# Supplementary material for: Ruthenium(ii)-catalyzed deoxygenation of ketones
Source: Royal Society of Chemistry journal article supplement (doi:10.1039/d2cc03326g), 2022-01-01

## Supplemental Information

### Ruthenium(II)-Catalyzed Deoxygenation of Ketones

Ruohua Gui<sup>a</sup> and Chao-Jun Li<sup>a,\*</sup>

<sup>a</sup>Department of Chemistry, FQRNT Center for Green Chemistry and Catalysis, McGill University, 801 Sherbrooke Street West, Montreal, Quebec H3A 0B8, Canada

*Email: cj.li@mcgill.ca*

#### Table of Contents

|                                                                                                      |     |
|------------------------------------------------------------------------------------------------------|-----|
| <b>I. General Methods</b> .....                                                                      | S2  |
| <b>II. Mechanism</b> .....                                                                           | S2  |
| <b>III. Optimization of Reaction Conditions</b> .....                                                | S3  |
| <b>IV. Other Substrates</b> .....                                                                    | S6  |
| <b>V. General Procedure for the Deoxygenation of Ketones</b> .....                                   | S7  |
| <b>VI. Characterization of Products</b> .....                                                        | S10 |
| <b>VII. References</b> .....                                                                         | S14 |
| <b>VIII. Copies of IR, HRMS, <sup>1</sup>H NMR, <sup>13</sup>C NMR, and <sup>19</sup>F NMR</b> ..... | S15 |
| <b>IX. Mechanistic studies</b> .....                                                                 | S69 |

#### I. General Methods

All reagents and solvents were purchased from commercial sources (Sigma-Aldrich) and used without further purification unless otherwise stated. Catalysts Ru-2, Ru-3, and Ru-5 were synthesized by mixing  $[(\text{Ph}_3\text{P})_3\text{RuCl}_2]$  with one equiv of ligand. The procedure was referred to that of Ru-PNX synthesis<sup>1</sup> but optimized to 75°C temperature and overnight reaction time. All reactions were monitored by thin-layer chromatography (TLC). All reactions were carried out under a nitrogen atmosphere unless otherwise stated. Column chromatography was performed on silica gel (200-300 mesh) and visualized with ultraviolet light. Ethyl acetate and hexane were used as eluents. <sup>1</sup>H, and <sup>13</sup>C NMR spectra were taken on Bruker AV300, Bruker AV400, Varian Mercury 400, and Varian/Agilent QANUC 500 with TMS as an internal standard and CDCl<sub>3</sub> as solvent unless otherwise stated. GC-MS analyses were performed with a Thermo TRACE 1300 ISQ LT spectrometer.

## II. Mechanism

Scheme 1. Proposed mechanism for the Ru-catalyzed ketone deoxygenation

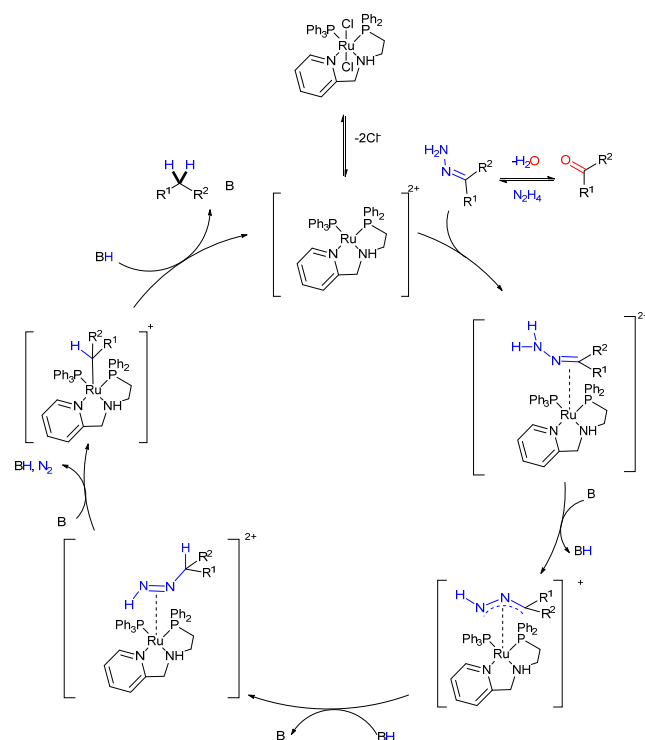

## III. Optimization of Reaction Conditions

### 1) Table S1. Screening ligands<sup>a</sup>

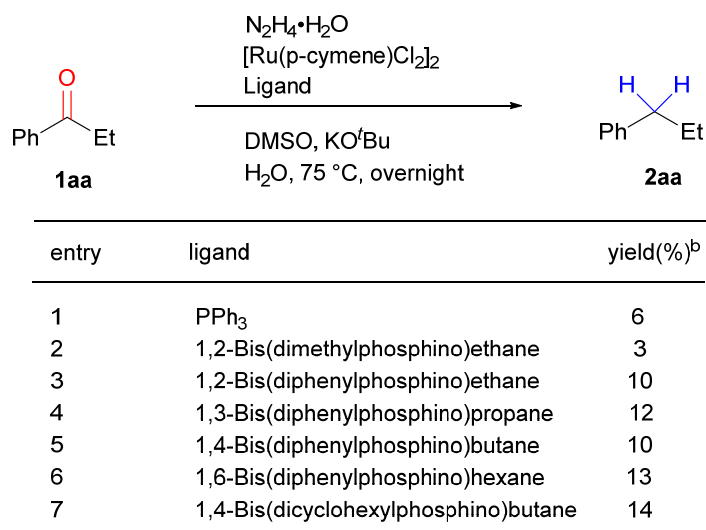

<sup>a</sup> **1aa** (26.5  $\mu\text{L}$ , 0.2 mmol, 1.0 equiv),  $\text{N}_2\text{H}_4\cdot\text{H}_2\text{O}$  (12  $\mu\text{L}$ , 0.24 mmol, 1.2 equiv),  $\text{H}_2\text{O}$  (0.2 mL),  $[\text{Ru}(\text{p-cymene})\text{Cl}_2]_2$  (1.6 mg, 0.003 mmol, 1.5 mol%), ligand (0.006 mmol, 3 mol%),  $\text{KO}^t\text{Bu}$  (11.2 mg, 0.1 mmol, 0.5 equiv), additive: DMSO (2.6  $\mu\text{L}$ , 0.04 mmol, 20 mol%), 75°C, overnight, under  $\text{N}_2$ . <sup>b</sup> Yields were determined by crude  $^1\text{H}$  NMR using mesitylene as an internal standard.

### 2) Table S2. Screening bases<sup>a</sup>

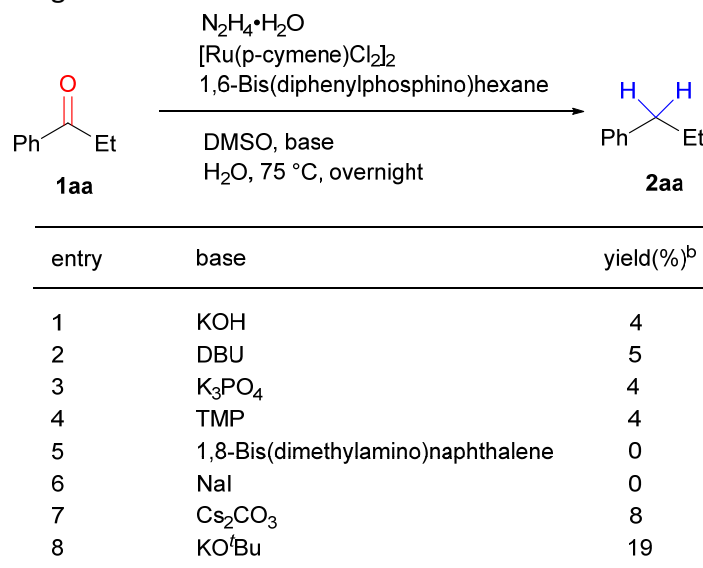

<sup>a</sup> **1aa** (26.5  $\mu\text{L}$ , 0.2 mmol, 1.0 equiv),  $\text{N}_2\text{H}_4\cdot\text{H}_2\text{O}$  (12  $\mu\text{L}$ , 0.24 mmol, 1.2 equiv),  $\text{H}_2\text{O}$  (0.2 mL),  $[\text{Ru}(\text{p-cymene})\text{Cl}_2]_2$  (1.6 mg, 0.003 mmol, 1.5 mol%), 1,6-bis(diphenylphosphino)hexane (2.7 mg, 0.006 mmol, 3 mol%), base (0.4 mmol, 2.0 equiv), additive: DMSO (2.6  $\mu\text{L}$ , 0.04 mmol, 20 mol%), 75°C, overnight, under  $\text{N}_2$ . <sup>b</sup> Yields were determined by crude  $^1\text{H}$  NMR using mesitylene as an internal standard.

### 3) Table S3. Screening amount of bases<sup>a</sup>

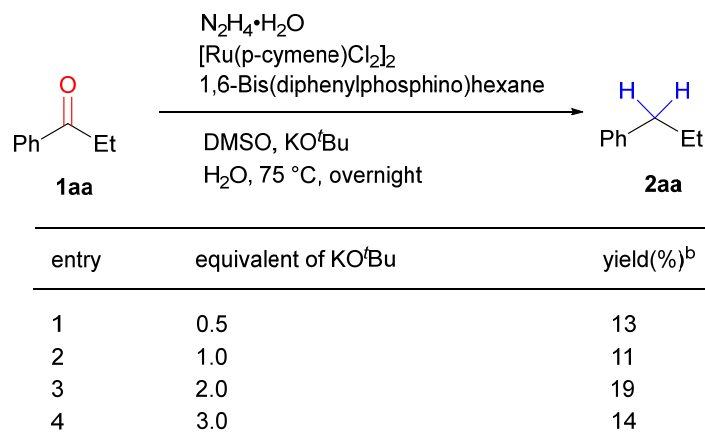

<sup>a</sup> **1aa** (26.5  $\mu\text{L}$ , 0.2 mmol, 1.0 equiv),  $\text{N}_2\text{H}_4 \cdot \text{H}_2\text{O}$  (12  $\mu\text{L}$ , 0.24 mmol, 1.2 equiv),  $\text{H}_2\text{O}$  (0.2 mL),  $[\text{Ru}(\text{p-cymene})\text{Cl}_2]_2$  (1.6 mg, 0.003 mmol, 1.5 mol%), 1,6-bis(diphenylphosphino)hexane (2.7 mg, 0.006 mmol, 3 mol%), KO<sup>t</sup>Bu, additive: DMSO (2.6  $\mu\text{L}$ , 0.04 mmol, 20 mol%), 75 $^\circ\text{C}$ , overnight, under  $\text{N}_2$ . <sup>b</sup> Yields were determined by crude  $^1\text{H}$  NMR using mesitylene as an internal standard.

#### 4) Table S4. Screening concentration<sup>a</sup>

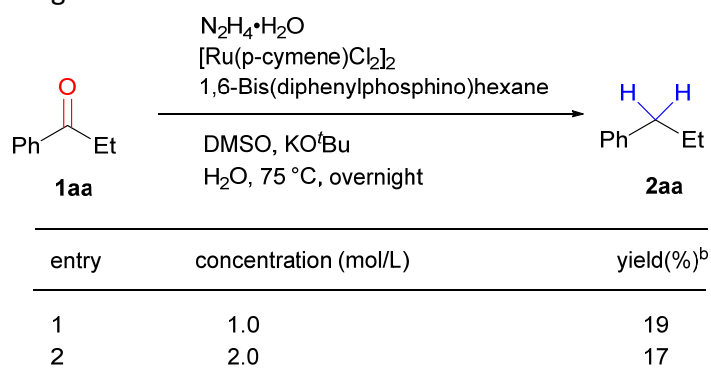

<sup>a</sup> **1aa** (26.5  $\mu\text{L}$ , 0.2 mmol, 1.0 equiv),  $\text{N}_2\text{H}_4 \cdot \text{H}_2\text{O}$  (12  $\mu\text{L}$ , 0.24 mmol, 1.2 equiv),  $\text{H}_2\text{O}$ ,  $[\text{Ru}(\text{p-cymene})\text{Cl}_2]_2$  (1.6 mg, 0.003 mmol, 1.5 mol%), 1,6-bis(diphenylphosphino)hexane (2.7 mg, 0.006 mmol, 3 mol%), KO<sup>t</sup>Bu (44.8 mg, 0.4 mmol, 2.0 equiv), additive: DMSO (2.6  $\mu\text{L}$ , 0.04 mmol, 20 mol%), 75 $^\circ\text{C}$ , overnight, under  $\text{N}_2$ . <sup>b</sup> Yields were determined by crude  $^1\text{H}$  NMR using mesitylene as an internal standard.

#### 5) Table S5. Screening temperature<sup>a</sup>

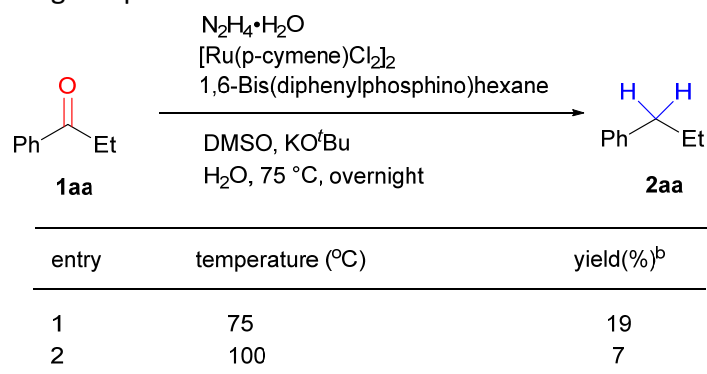

<sup>a</sup> **1aa** (26.5  $\mu\text{L}$ , 0.2 mmol, 1.0 equiv),  $\text{N}_2\text{H}_4 \cdot \text{H}_2\text{O}$  (12  $\mu\text{L}$ , 0.24 mmol, 1.2 equiv),  $\text{H}_2\text{O}$  (0.2 mL),  $[\text{Ru}(\text{p-cymene})\text{Cl}_2]_2$  (1.6 mg, 0.003 mmol, 1.5 mol%), 1,6-bis(diphenylphosphino)hexane (2.7 mg, 0.006 mmol, 3 mol%), KO<sup>t</sup>Bu (44.8 mg, 0.4 mmol, 2.0 equiv), additive: DMSO (2.6  $\mu\text{L}$ , 0.04 mmol, 20 mol%), overnight, under  $\text{N}_2$ . <sup>b</sup> Yields were determined by crude  $^1\text{H}$  NMR using mesitylene as an internal standard.

#### 6) Table S6. Screening amount of additive<sup>a</sup>

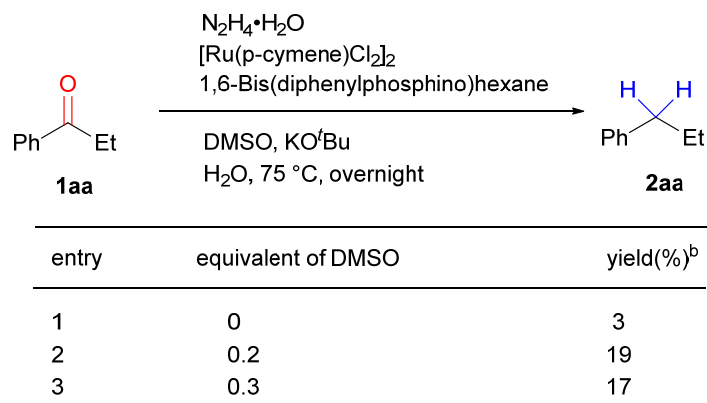

<sup>a</sup> **1aa** (26.5  $\mu\text{L}$ , 0.2 mmol, 1.0 equiv),  $\text{N}_2\text{H}_4 \cdot \text{H}_2\text{O}$  (12  $\mu\text{L}$ , 0.24 mmol, 1.2 equiv),  $\text{H}_2\text{O}$  (0.2 mL),  $[\text{Ru}(\text{p-cymene})\text{Cl}_2]_2$  (1.6 mg, 0.003 mmol, 1.5 mol%), 1,6-bis(diphenylphosphino)hexane (2.7 mg, 0.006 mmol, 3 mol%),  $\text{KO}^t\text{Bu}$  (44.8 mg, 0.4 mmol, 2.0 equiv), additive: DMSO, 75°C, overnight, under  $\text{N}_2$ . <sup>b</sup> Yields were determined by crude  $^1\text{H}$  NMR using mesitylene as an internal standard.

#### 7) Table S7. Screening additive<sup>a</sup>

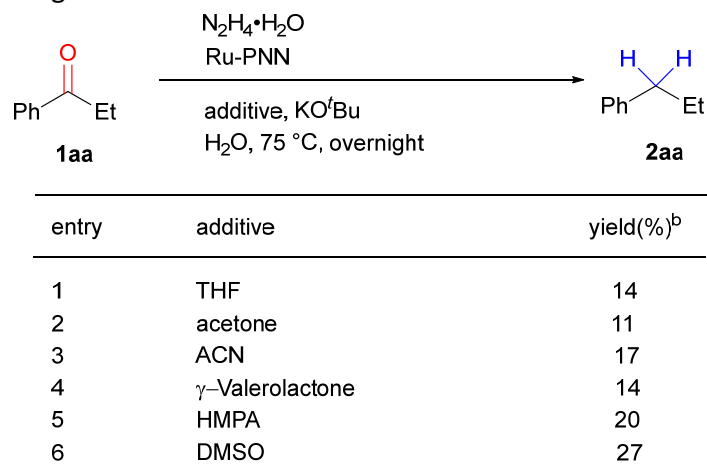

<sup>a</sup> **1aa** (26.5  $\mu\text{L}$ , 0.2 mmol, 1.0 equiv),  $\text{N}_2\text{H}_4 \cdot \text{H}_2\text{O}$  (12  $\mu\text{L}$ , 0.24 mmol, 1.2 equiv),  $\text{H}_2\text{O}$  (0.2 mL), Ru-PNN (4.5 mg, 0.006 mmol, 3.0 mol%),  $\text{KO}^t\text{Bu}$  (44.8 mg, 0.4 mmol, 2.0 equiv), additive (0.04 mmol, 20 mol%), 75°C, overnight, under  $\text{N}_2$ . <sup>b</sup> Yields were determined by crude  $^1\text{H}$  NMR using mesitylene as an internal standard.

## IV. Other Substrates

Scheme 2. Substrate scope in methanol conditions<sup>a, b</sup>

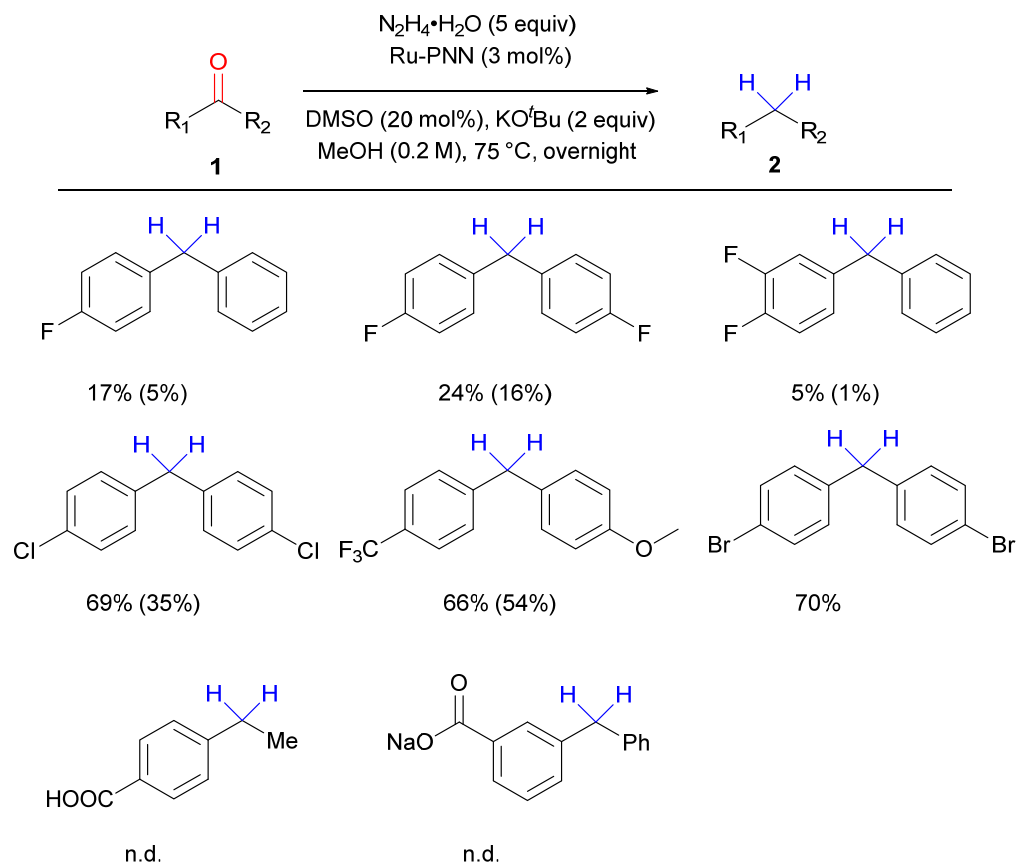

<sup>a</sup> **1** (0.2 mmol, 1.0 equiv),  $\text{N}_2\text{H}_4\cdot\text{H}_2\text{O}$  (50  $\mu\text{L}$ , 1.0 mmol, 5.0 equiv), methanol (0.2 mL), Ru-PNN (4.5 mg, 0.006 mmol, 3 mol%),  $\text{KO}^t\text{Bu}$  (44.8 mg, 0.4 mmol, 2.0 equiv), additive: DMSO (2.6  $\mu\text{L}$ , 0.04 mmol, 20 mol%), 75 $^\circ\text{C}$ , overnight, under  $\text{N}_2$ . <sup>b</sup> Yields were determined by crude  $^1\text{H}$  NMR using mesitylene as an internal standard. Isolated yields were given in the parentheses.

Scheme 3. Substrates not tolerated<sup>a</sup>

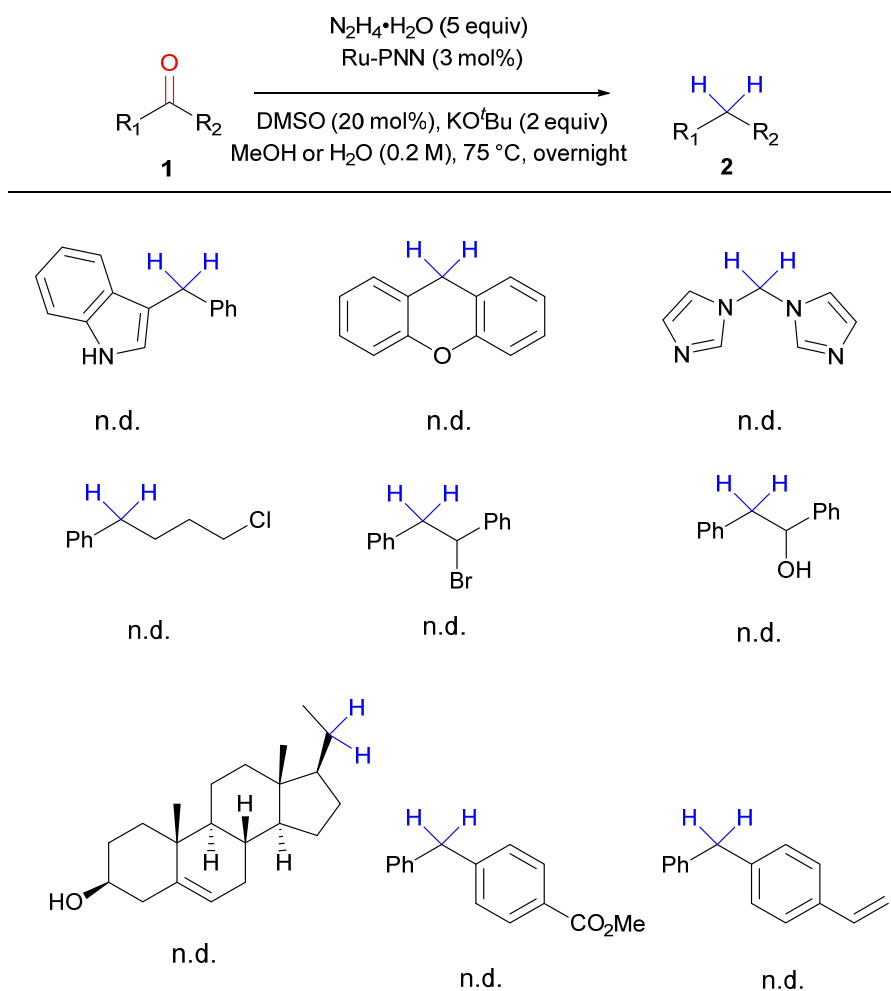

<sup>a</sup> **1** (0.2 mmol, 1.0 equiv),  $\text{N}_2\text{H}_4 \cdot \text{H}_2\text{O}$  (50  $\mu\text{L}$ , 1.0 mmol, 5.0 equiv), methanol (0.2 mL),  $\text{Ru-PNN}$  (4.5 mg, 0.006 mmol, 3 mol%),  $\text{KO}^t\text{Bu}$  (44.8 mg, 0.4 mmol, 2.0 equiv), additive: DMSO (2.6  $\mu\text{L}$ , 0.04 mmol, 20 mol%), 75°C, overnight, under  $\text{N}_2$ .

Scheme 4. Other substrates with poor yields<sup>a</sup>

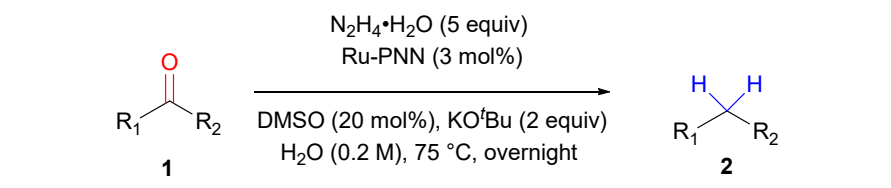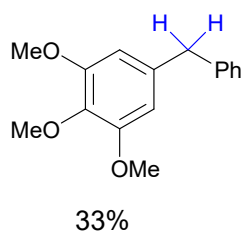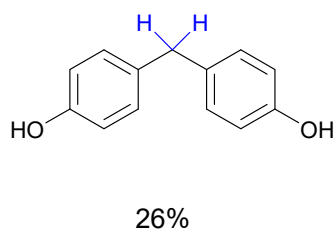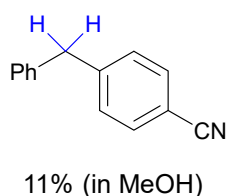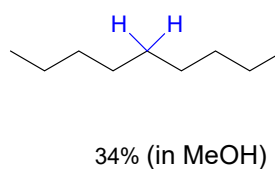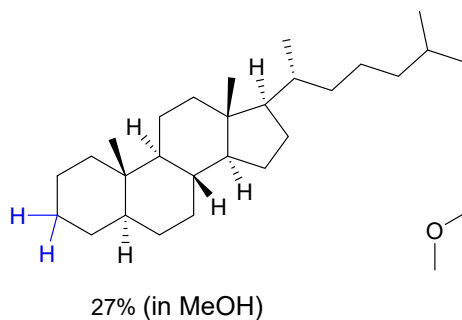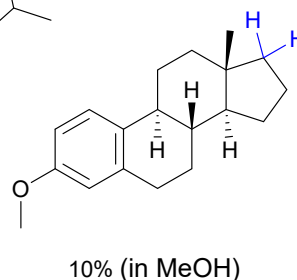

<sup>a</sup> **1** (0.2 mmol, 1.0 equiv),  $\text{N}_2\text{H}_4 \cdot \text{H}_2\text{O}$  (50  $\mu\text{L}$ , 1.0 mmol, 5.0 equiv), methanol or water (0.2 mL),  $\text{Ru-PNN}$  (4.5 mg, 0.006 mmol, 3 mol%),  $\text{KO}^t\text{Bu}$  (44.8 mg, 0.4 mmol, 2.0 equiv), additive: DMSO (2.6  $\mu\text{L}$ , 0.04 mmol, 20 mol%), 75 °C, overnight, under  $\text{N}_2$ . <sup>b</sup> Yields were determined by crude  $^1\text{H}$  NMR using mesitylene as an internal standard. <sup>c</sup> Yields were determined by crude GC using mesitylene as an internal standard. Isolated yields were given in the parentheses.

## V. General Procedure for the Deoxygenation of Ketones

### General procedure with liquid ketones

A 10 mL V-shape microwave vial with a magnetic stir-bar was transferred to glovebox and charged with  $\text{Ru-PNN}$  (4.5 mg, 0.006 mmol, 3 mol%) and  $\text{KO}^t\text{Bu}$  (44.8 mg, 0.4 mmol, 2.0 equiv). The tube was capped with a rubber septum stopper and taken out from the glovebox. To the microwave vial, hydrazine monohydrate (50  $\mu\text{L}$ , 1.0 mmol, 5.0 equiv), ketone (0.2 mmol, 1.0 equiv), and DMSO (2.6  $\mu\text{L}$ , 0.04 mmol, 20 mol%) were charged via Hamilton microliter syringes. Solvent (0.2 mL) was added through a 1 mL plastic syringe. The tube was placed in a preheated oil bath at 75 °C and the mixture was stirred under an argon atmosphere overnight. The reaction mixture was cooled to room temperature and charged with mesitylene (9.2  $\mu\text{L}$ , 0.067 mmol, 0.33 equiv). The solution was diluted with



diethyl ether filtered through anhydrous  $\text{MgSO}_4$  followed by silica gel, concentrated, and then purified by column chromatography on silica gel eluting with pentane:  $\text{Et}_2\text{O}$  (100:1-10:1). The solvent was frozen in an ice-water bath and gently evacuated by vacuum to afford the products.

#### **General procedure with solid ketones**

A 10 mL V-shape microwave vial with a magnetic stir-bar was transferred to glovebox and charged with Ru-PNN (4.5 mg, 0.006 mmol, 3 mol%),  $\text{KO}^t\text{Bu}$  (44.8 mg, 0.4 mmol, 2.0 equiv) and ketone (0.2 mmol, 1.0 equiv). The tube was capped with a rubber septum stopper and taken out from the glovebox. To the microwave vial, hydrazine monohydrate (50  $\mu\text{L}$ , 1.0 mmol, 5.0 equiv), and DMSO (2.6  $\mu\text{L}$ , 0.04 mmol, 20 mol%) were charged via Hamilton microliter syringes. Solvent (0.2 mL) was added through a 1 mL plastic syringe. The tube was placed in a preheated oil bath at 75  $^\circ\text{C}$  and the mixture was stirred under an argon atmosphere overnight. The reaction mixture was cooled to room temperature and charged with mesitylene (9.2  $\mu\text{L}$ , 0.067 mmol, 0.33 equiv). The solution was diluted with diethyl ether filtered through anhydrous  $\text{MgSO}_4$  followed by silica gel, concentrated, and then purified by column chromatography on silica gel eluting with pentane:  $\text{Et}_2\text{O}$  (100:1-10:1). The solvent was frozen in an ice-water bath and gently evacuated by vacuum to afford the products.

#### **General procedure with hydroxyl, amino and carboxylic acid substituted ketones**

A 10 mL V-shape microwave vial with a magnetic stir-bar was transferred to glovebox and charged with Ru-PNN (4.5 mg, 0.006 mmol, 3 mol%),  $\text{KO}^t\text{Bu}$  (67.2 mg, 0.6 mmol, 3.0 equiv) and ketone (0.2 mmol, 1.0 equiv). The tube was capped with a rubber septum stopper and taken out from the glovebox. To the microwave vial, hydrazine monohydrate (50  $\mu\text{L}$ , 1.0 mmol, 5.0 equiv), and DMSO (2.6  $\mu\text{L}$ , 0.04 mmol, 20 mol%) were charged via Hamilton microliter syringes. Water (0.2 mL) was added through a 1 mL plastic syringe. The tube was placed in a preheated oil bath at 75  $^\circ\text{C}$  and the mixture was stirred under an argon atmosphere overnight. The reaction mixture was cooled to room temperature and charged with mesitylene (9.2  $\mu\text{L}$ , 0.067 mmol, 0.33 equiv). The solution was diluted with diethyl ether, filtered through anhydrous  $\text{MgSO}_4$  followed by silica gel, concentrated, and then purified by column chromatography on silica gel eluting with pentane:  $\text{Et}_2\text{O}$  (4:1-1:1). The solvent was frozen in an ice-water bath and gently evacuated by vacuum to afford the products.

#### **General procedure with sodium carboxylate substituted ketones**

A 10 mL V-shape microwave vial with a magnetic stir-bar was transferred to glovebox and charged with Ru-PNN (4.5 mg, 0.006 mmol, 3 mol%),  $\text{KO}^t\text{Bu}$  (67.2 mg, 0.6 mmol, 3.0 equiv) and ketone (0.2 mmol, 1.0 equiv). The tube was capped with a rubber septum stopper and taken out from the glovebox. To the microwave vial, hydrazine monohydrate (50  $\mu\text{L}$ , 1.0 mmol, 5.0 equiv), and DMSO (2.6  $\mu\text{L}$ , 0.04 mmol, 20 mol%) were charged via Hamilton microliter syringes. Water (0.2 mL) was added through a 1 mL plastic syringe. The tube was placed in a preheated oil bath at 75  $^\circ\text{C}$  and the mixture was stirred under an argon atmosphere overnight. The reaction mixture was cooled to room temperature and charged

with mesitylene (9.2  $\mu$ L, 0.067 mmol, 0.33 equiv). Concentrate hydrochloric acid was added dropwise until the solution became acidic. Centrifuge the slurry to isolate the products, and extract the aqueous solution with diethyl ether. Dry the organic layer, pass through a layer of silica and evacuate the solvent to afford the remaining products.

## VI. Characterization of Products

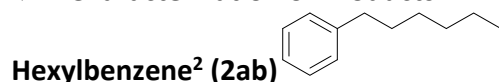

Clear colorless liquid. <sup>1</sup>H NMR (500 MHz, CDCl<sub>3</sub>)  $\delta$  7.31 – 7.24 (m, 2H), 7.18 (d, *J* = 7.5 Hz, 3H), 2.64 – 2.57 (m, 2H), 1.66 – 1.58 (m, 2H), 1.39 – 1.25 (m, 6H), 0.92 – 0.85 (m, 3H). <sup>13</sup>C NMR (126 MHz, CDCl<sub>3</sub>)  $\delta$  143.0, 128.4, 128.2, 125.5, 36.0, 31.7, 31.5, 29.0, 22.6, 14.1.

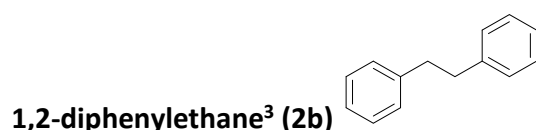

White solid. <sup>1</sup>H NMR (400 MHz, CDCl<sub>3</sub>)  $\delta$  7.28 (ddd, *J* = 9.1, 6.3, 0.9 Hz, 4H), 7.25 – 7.13 (m, 6H), 2.93 (s, 4H). <sup>13</sup>C NMR (126 MHz, CDCl<sub>3</sub>)  $\delta$  141.8, 128.4, 128.3, 125.9, 37.9.

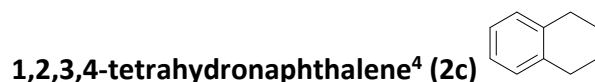

Clear colorless liquid. <sup>1</sup>H NMR (500 MHz, CDCl<sub>3</sub>)  $\delta$  7.09 (h, *J* = 4.6, 4.2 Hz, 4H), 2.80 (h, *J* = 3.1 Hz, 4H), 1.87 – 1.78 (m, *J* = 4.3 Hz, 4H). <sup>13</sup>C NMR (126 MHz, CDCl<sub>3</sub>)  $\delta$  137.1, 129.1, 125.4, 29.4, 23.2.

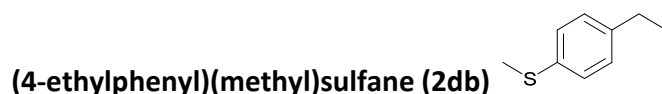

Clear colorless liquid. <sup>1</sup>H NMR (400 MHz, CDCl<sub>3</sub>)  $\delta$  7.24 – 7.18 (m, 2H), 7.16 – 7.10 (m, 2H), 2.61 (q, *J* = 7.6 Hz, 2H), 2.47 (s, 3H), 1.22 (t, *J* = 7.6 Hz, 3H). <sup>13</sup>C NMR (126 MHz, CDCl<sub>3</sub>)  $\delta$  141.5, 134.9, 128.4, 127.3, 28.3, 16.5, 15.6. IR wavenumber (cm<sup>-1</sup>) 2963.7, 2921.6, 2872.2, 1493.6, 1121.9, 816.8. HRMS calc. for C<sub>9</sub>H<sub>12</sub>OSNa [M+Na+O]<sup>+</sup>: 191.0501; found, 191.0493.

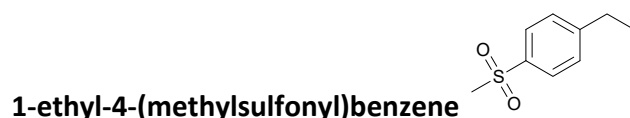

Clear colorless liquid. <sup>1</sup>H NMR (400 MHz, CDCl<sub>3</sub>)  $\delta$  7.89 – 7.81 (m, 2H), 7.42 – 7.35 (m, 2H), 3.04 (s, 3H), 2.75 (q, *J* = 7.6 Hz, 2H), 1.27 (t, *J* = 7.6 Hz, 3H). <sup>13</sup>C NMR (126 MHz, CDCl<sub>3</sub>)  $\delta$  150.8, 137.9, 128.8, 127.5, 44.6, 28.9, 15.1. IR wavenumber (cm<sup>-1</sup>) 2968.5, 2930.1, 2875.3, 1300.0, 1144.5, 547.3, 517.8. HRMS calc. for C<sub>9</sub>H<sub>12</sub>O<sub>2</sub>SNa [M+Na]<sup>+</sup>: 207.0450; found, 207.0451.

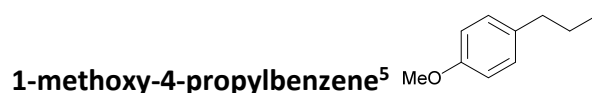

Clear colorless liquid. <sup>1</sup>H NMR (400 MHz, CDCl<sub>3</sub>)  $\delta$  7.13 – 7.05 (m, 2H), 6.87 – 6.78 (m, 2H), 3.79 (s, 3H), 2.53 (dd, *J* = 8.5, 6.7 Hz, 2H), 1.68 – 1.54 (m, 2H), 0.93 (t, *J* = 7.3 Hz, 3H). <sup>13</sup>C NMR (126 MHz, CDCl<sub>3</sub>)  $\delta$  157.61, 134.81, 129.29, 113.61, 55.24, 37.13, 24.78, 13.77.

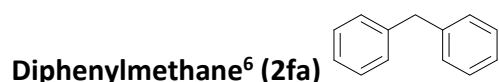

Clear colorless liquid. <sup>1</sup>H NMR (400 MHz, CDCl<sub>3</sub>)  $\delta$  7.33 – 7.25 (m, 4H), 7.24 – 7.13 (m, 6H), 3.99 (s, 2H). <sup>13</sup>C NMR (101 MHz, CDCl<sub>3</sub>)  $\delta$  141.1, 128.9, 128.4, 126.1, 41.9.

**1-benzyl-4-methylbenzene<sup>7</sup> (2fb)**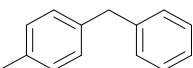

Brown liquid. <sup>1</sup>H NMR (400 MHz, CDCl<sub>3</sub>) δ 7.34 – 7.25 (m, 2H), 7.20 (ddt, *J* = 7.4, 3.1, 1.9 Hz, 3H), 7.15 – 7.06 (m, 4H), 3.96 (s, 2H), 2.33 (s, 3H). <sup>13</sup>C NMR (126 MHz, CDCl<sub>3</sub>) δ 141.4, 138.1, 135.5, 129.1, 128.9, 128.8, 128.4, 126.0, 41.5, 21.0.

**1-benzyl-2-methylbenzene<sup>8</sup> (2fc)**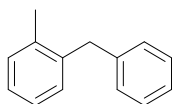

Clear colorless liquid. <sup>1</sup>H NMR (400 MHz, CDCl<sub>3</sub>) δ 7.32 – 7.24 (m, 2H), 7.28 – 7.07 (m, 7H), 4.00 (s, 2H), 2.25 (s, 3H). <sup>13</sup>C NMR (126 MHz, CDCl<sub>3</sub>) δ 140.4, 138.9, 136.6, 130.3, 129.9, 128.7, 128.4, 126.4, 126.0, 125.9, 39.4, 19.7.

**1-benzyl-3,5-dibutoxybenzene (2fd)**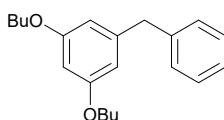

Clear colorless liquid. <sup>1</sup>H NMR (500 MHz, CDCl<sub>3</sub>) δ 7.29 – 7.13 (m, 5H), 6.97 (d, *J* = 8.2 Hz, 1H), 6.45 (d, *J* = 2.4 Hz, 1H), 6.40 (dd, *J* = 8.3, 2.4 Hz, 1H), 3.97 – 3.89 (m, 6H), 1.75 (dddd, *J* = 15.3, 12.2, 7.6, 6.3 Hz, 4H), 1.55 – 1.38 (m, 4H), 0.97 (dt, *J* = 18.4, 7.4 Hz, 6H). <sup>13</sup>C NMR (126 MHz, CDCl<sub>3</sub>) δ 158.9, 157.7, 141.7, 130.4, 128.8, 128.1, 125.5, 122.1, 104.4, 99.7, 67.7, 67.6, 35.5, 31.4, 31.3, 19.3, 13.9, 13.8. IR wavenumber (cm<sup>-1</sup>) 3060.7, 3026.8, 2957.2, 2932.0, 2870.4, 1300.0, 1173.4. HRMS calc. for C<sub>21</sub>H<sub>28</sub>O<sub>2</sub>Na [M+Na]<sup>+</sup>: 335.1982; found, 335.1978.

**1-methoxy-3-(4-methoxybenzyl)benzene (2ga)**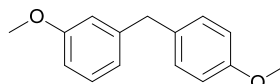

Clear yellow liquid. <sup>1</sup>H NMR (400 MHz, CDCl<sub>3</sub>) δ 7.20 (td, *J* = 7.7, 0.8 Hz, 1H), 7.15 – 7.07 (m, 2H), 6.87 – 6.80 (m, 2H), 6.80 – 6.74 (m, 1H), 6.77 – 6.69 (m, 2H), 3.90 (s, 2H), 3.78 (s, 3H), 3.77 (s, 3H). <sup>13</sup>C NMR (101 MHz, CDCl<sub>3</sub>) δ 159.7, 158.0, 143.2, 133.0, 129.8, 129.4, 121.2, 114.6, 113.9, 111.2, 55.3, 55.1, 41.0. IR wavenumber (cm<sup>-1</sup>) 3029.4, 2998.3, 2954.8, 2933.2, 2834.1.4, 1280.3. HRMS calc. for C<sub>15</sub>H<sub>16</sub>NaO<sub>2</sub> [M+Na]<sup>+</sup>: 251.1043; found, 251.1034.

**1-methoxy-4-(4-methylbenzyl)benzene<sup>9</sup> (2gb)**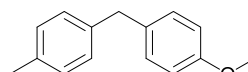

Clear yellow liquid. <sup>1</sup>H NMR (400 MHz, CDCl<sub>3</sub>) δ 7.14 – 7.03 (m, 6H), 6.90 – 6.79 (m, 2H), 3.89 (s, 2H), 3.78 (s, 3H), 2.32 (s, 3H). <sup>13</sup>C NMR (126 MHz, CDCl<sub>3</sub>) δ 157.9, 138.5, 135.4, 133.5, 129.8, 129.1, 128.7, 113.8, 55.2, 40.6, 21.0.

**(E)-1-benzyl-4-styrylbenzene (2h)**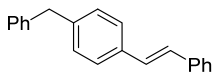

White solid. <sup>1</sup>H NMR (400 MHz, CDCl<sub>3</sub>) δ 7.54 – 7.47 (m, 2H), 7.47 – 7.41 (m, 2H), 7.35 (dd, *J* = 8.4, 6.9 Hz, 2H), 7.35 – 7.26 (m, 2H), 7.29 – 7.19 (m, 2H), 7.20 (td, *J* = 6.1, 1.8 Hz, 4H), 7.08 (d, *J* = 1.6 Hz, 2H), 4.00 (s, 2H). <sup>13</sup>C NMR (126 MHz, CDCl<sub>3</sub>) δ 141.0, 140.7, 137.4, 135.3, 129.3, 128.9, 128.6, 128.5, 128.5, 128.1, 127.5, 126.6, 126.4, 126.1, 41.7. IR wavenumber (cm<sup>-1</sup>) 3079.0, 3053.5, 3022.3, 2921.0, 2852.5, 1491.5, 1448.5, 1416.8. HRMS calc. for C<sub>21</sub>H<sub>19</sub> [M+H]<sup>+</sup>: 271.14813; found, 271.14840.

**1-benzyl-4-(dec-1-yn-1-yl)benzene (2i)**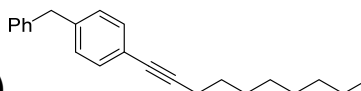

Clear yellow liquid. <sup>1</sup>H NMR (500 MHz, CDCl<sub>3</sub>) δ 7.33 – 7.26 (m, 4H), 7.25 – 7.13 (m, 3H), 7.13 – 7.07 (m, 2H), 3.96 (s, 2H), 2.38 (t, *J* = 7.1 Hz, 2H), 1.43 (p, *J* = 7.0 Hz, 2H), 1.37 – 1.21 (m, 10H), 0.97 – 0.77 (m, 3H).

$^{13}\text{C}$  NMR (126 MHz,  $\text{CDCl}_3$ )  $\delta$  140.7, 140.5, 131.6, 128.9, 128.8, 128.5, 126.1, 121.8, 90.1, 80.4, 41.7, 31.8, 29.2, 29.1, 28.9, 28.8, 22.7, 19.4, 14.1. IR wavenumber ( $\text{cm}^{-1}$ ) 3027.0, 2953.9, 2924.0, 2854.0, 1508.1, 1494.4, 696.6. HRMS calc. for  $\text{C}_{23}\text{H}_{29}$   $[\text{M}+\text{H}]^+$ : 305.22638; found, 305.22638.

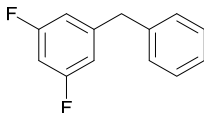

### 1-benzyl-3,5-difluorobenzene (2j)

Clear colorless liquid.  $^1\text{H}$  NMR (400 MHz,  $\text{CDCl}_3$ )  $\delta$  7.36 – 7.13 (m, 5H), 6.71 (t,  $J = 1.9$  Hz, 1H), 6.69 (t,  $J = 2.0$  Hz, 1H), 6.64 (tt,  $J = 9.0, 2.4$  Hz, 1H), 3.95 (s, 2H).  $^{13}\text{C}$  NMR (126 MHz,  $\text{CDCl}_3$ )  $\delta$  163.0 (dd,  $J = 12.8, 248.0$  Hz), 145.0 (t,  $J = 9.0$  Hz), 139.4, 128.9, 128.7, 126.6, 111.6 (dd,  $J = 6.3, 12.6$  Hz), 101.6 (t,  $J = 25.5$  Hz), 41.6 (t,  $J = 2.6$  Hz).  $^{19}\text{F}$  NMR (376 MHz,  $\text{CDCl}_3$ )  $\delta$  -110.4 – -110.5 (m,  $J = 1.9$  Hz, 7.5 Hz). IR wavenumber ( $\text{cm}^{-1}$ ) 3087.8, 3063.5, 3029.2, 2919.3, 1737.5, 1623.2, 1115.5, 971.9, 700.1. HRMS calc. for  $\text{C}_{13}\text{H}_9\text{F}_2$   $[\text{M}-\text{H}]^+$ : 203.06778; found, 203.06705.

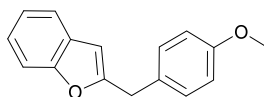

### 2-(4-methoxybenzyl)benzofuran (2k)

Clear colorless liquid.  $^1\text{H}$  NMR (500 MHz,  $\text{CDCl}_3$ )  $\delta$  7.50 – 7.44 (m, 1H), 7.41 (dq,  $J = 8.1, 0.9$  Hz, 1H), 7.28 – 7.14 (m, 4H), 6.91 – 6.84 (m, 2H), 6.35 (q,  $J = 1.0$  Hz, 1H), 4.06 (d,  $J = 1.0$  Hz, 2H), 3.81 (s, 3H).  $^{13}\text{C}$  NMR (126 MHz,  $\text{CDCl}_3$ )  $\delta$  158.5, 158.3, 154.9, 129.9, 129.2, 128.8, 123.3, 122.5, 120.4, 114.0, 110.9, 103.1, 55.3, 34.1. IR wavenumber ( $\text{cm}^{-1}$ ) 3033.4, 2997.9, 2954.4, 2933.2, 2905.5, 2834.4, 1510.2, 1300.5. HRMS calc. for  $\text{C}_{16}\text{H}_{14}\text{O}_2\text{Na}$   $[\text{M}+\text{Na}]^+$ : 261.08860; found, 261.08815.

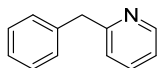

### 2-benzylpyridine<sup>10</sup> (2l)

Clear colorless liquid.  $^1\text{H}$  NMR (500 MHz,  $\text{CDCl}_3$ )  $\delta$  8.55 (dt,  $J = 4.6, 1.7$  Hz, 1H), 7.58 (td,  $J = 7.7, 1.9$  Hz, 1H), 7.34 – 7.25 (m, 4H), 7.25 – 7.18 (m, 1H), 7.11 (dd,  $J = 7.5, 4.6$  Hz, 2H), 4.17 (s, 2H).  $^{13}\text{C}$  NMR (126 MHz,  $\text{CDCl}_3$ )  $\delta$  161.0, 149.3, 139.5, 136.6, 129.1, 128.6, 126.4, 123.1, 121.2, 44.7.

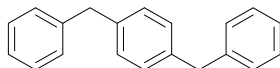

### 1,4-dibenzylbenzene<sup>12</sup>

White solid.  $^1\text{H}$  NMR (400 MHz,  $\text{CDCl}_3$ )  $\delta$  7.31 – 7.24 (m, 4H), 7.19 (tt,  $J = 6.4, 1.2$  Hz, 6H), 7.10 (s, 4H), 3.95 (s, 4H).  $^{13}\text{C}$  NMR (126 MHz,  $\text{CDCl}_3$ )  $\delta$  141.2, 138.8, 129.0, 128.9, 128.4, 126.0, 41.5.

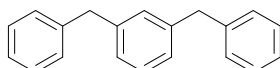

### 1,3-dibenzylbenzene

White cloudy oil.  $^1\text{H}$  NMR (400 MHz,  $\text{CDCl}_3$ )  $\delta$  7.28 (dd,  $J = 8.0, 6.6$  Hz, 4H), 7.24 – 7.15 (m, 7H), 7.11 – 6.99 (m, 3H), 3.95 (s, 4H).  $^{13}\text{C}$  NMR (126 MHz,  $\text{CDCl}_3$ )  $\delta$  141.2, 141.1, 129.6, 128.9, 128.6, 128.4, 126.7, 126.0, 41.9. IR wavenumber ( $\text{cm}^{-1}$ ) 3059.4, 3023.8, 2960.7, 2912.2, 2899.5, 2833.3, 722.5, 696.0. HRMS calc. for  $\text{C}_{20}\text{H}_{17}$   $[\text{M}-\text{H}]^+$ : 257.13248; found, 257.13182.

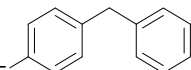

### 1-benzyl-4-fluorobenzene<sup>13</sup> (2m)

Clear colorless liquid.  $^1\text{H}$  NMR (400 MHz,  $\text{CDCl}_3$ )  $\delta$  7.33 – 7.27 (m, 2H), 7.23 – 7.20 (m, 1H), 7.20 – 7.12 (m, 4H), 7.01 – 6.91 (m, 2H), 3.95 (s, 2H).  $^{13}\text{C}$  NMR (126 MHz,  $\text{CDCl}_3$ )  $\delta$  161.4 (d,  $J = 263.9$  Hz), 140.9 (d,  $J = 1.0$  Hz), 136.7 (d,  $J = 3.2$  Hz), 130.3 (d,  $J = 7.8$  Hz), 128.8, 128.5, 126.2, 115.27 (d,  $J = 21.2$  Hz), 41.1.  $^{19}\text{F}$  NMR (471 MHz,  $\text{CDCl}_3$ )  $\delta$  -117.4 (t,  $J = 6.8$  Hz).

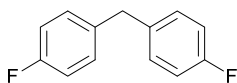

### bis(4-fluorophenyl)methane<sup>14</sup> (2n)

Clear colorless liquid.  $^1\text{H}$  NMR (500 MHz,  $\text{CDCl}_3$ )  $\delta$  7.15 – 7.08 (m, 4H), 7.02 – 6.93 (m, 4H), 3.92 (s, 2H).  $^{13}\text{C}$  NMR (126 MHz,  $\text{CDCl}_3$ )  $\delta$  161.5 (d,  $J = 244$  Hz), 136.6 (d,  $J = 3.8$  Hz), 130.2 (d,  $J = 7.6$  Hz), 115.3 (d,  $J = 21.4$  Hz), 40.2.  $^{19}\text{F}$  NMR (471 MHz,  $\text{CDCl}_3$ )  $\delta$  -110.5 (d,  $J = 8.4$  Hz), -117.2 (dt,  $J = 8.5, 5.1$  Hz).

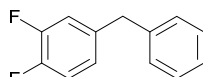

**4-benzyl-1,2-difluorobenzene (2o)**

Clear colorless liquid.  $^1\text{H}$  NMR (400 MHz,  $\text{CDCl}_3$ )  $\delta$  7.35 – 7.27 (m, 2H), 7.26 – 7.20 (m, 1H), 7.19 – 7.12 (m, 2H), 7.06 (dt,  $J = 10.3, 8.3$  Hz, 1H), 6.96 (ddd,  $J = 11.3, 7.6, 2.2$  Hz, 1H), 6.92 – 6.86 (m, 1H), 3.93 (s, 2H).  $^{13}\text{C}$  NMR (126 MHz,  $\text{CDCl}_3$ )  $\delta$  150.2 (dd,  $J = 75.6, 248.0$  Hz), 149.5 (dd,  $J = 75.6, 248.0$  Hz), 140.1, 138.1, 128.8, 128.7, 126.5, 125.1 – 124.4 (m), 117.6 (d,  $J = 16.6$  Hz), 117.0 (d,  $J = 17.2$  Hz), 41.0.  $^{19}\text{F}$  NMR (376 MHz,  $\text{CDCl}_3$ )  $\delta$  -138.2 (dddd,  $J = 21.2, 11.4, 8.2, 1.4$  Hz), -141.9 – -142.1 (m,  $J = 3.8, 11.3$  Hz). IR wavenumber ( $\text{cm}^{-1}$ ) 3066.3, 3029.7, 2911.0, 2837.1, 751.3, 715.9. HRMS calc. for  $\text{C}_{13}\text{H}_9\text{F}_2$   $[\text{M}-\text{H}]^+$ : 203.06778; found, 203.06690.

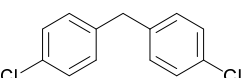

**bis(4-chlorophenyl)methane<sup>15</sup> (2p)**

Yellow oil.  $^1\text{H}$  NMR (500 MHz,  $\text{CDCl}_3$ )  $\delta$  7.34 – 7.23 (m, 4H), 7.15 – 7.07 (m, 4H), 3.92 (s, 2H).  $^{13}\text{C}$  NMR (126 MHz,  $\text{CDCl}_3$ )  $\delta$  139.0, 132.1, 130.2, 128.8, 40.5.

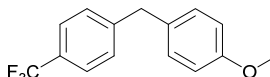

**1-methoxy-4-(4-(trifluoromethyl)benzyl)benzene (2q)**

Clear colorless liquid.  $^1\text{H}$  NMR (400 MHz,  $\text{CDCl}_3$ )  $\delta$  7.53 (d,  $J = 8.1$  Hz, 2H), 7.36 – 7.23 (m, 2H), 7.14 – 7.04 (m, 2H), 6.92 – 6.80 (m, 2H), 3.98 (s, 2H), 3.79 (s, 3H).  $^{13}\text{C}$  NMR (126 MHz,  $\text{CDCl}_3$ )  $\delta$  158.2, 145.7, 132.1, 129.9, 129.0, 128.5, 125.4 (q,  $J = 4.2, 3.6$  Hz), 114.1, 55.3, 40.8.  $^{19}\text{F}$  NMR (376 MHz,  $\text{CDCl}_3$ )  $\delta$  -62.4 (s). IR wavenumber ( $\text{cm}^{-1}$ ) 3006.1, 2934.3, 2837.5, 1510.8, 1323.0, 1113.4, 1065.3. HRMS calc. for  $\text{C}_{15}\text{H}_{12}\text{OF}_3$   $[\text{M}-\text{H}]^+$ : 265.08457; found, 265.08389.

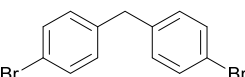

**bis(4-bromophenyl)methane (2r)**

Pale yellow oil, solidify at room temperature.  $^1\text{H}$  NMR (500 MHz,  $\text{CDCl}_3$ )  $\delta$  7.51 – 7.34 (m, 4H), 7.09 – 6.94 (m, 4H), 3.88 (s, 2H).  $^{13}\text{C}$  NMR (126 MHz,  $\text{CDCl}_3$ )  $\delta$  139.4, 131.6, 130.6, 120.2, 40.6. IR wavenumber ( $\text{cm}^{-1}$ ) 2937.2, 2919.1, 2851.0, 1483.6, 1066.5, 1009.3, 826.7, 805.2. HRMS calc. for  $\text{C}_{13}\text{H}_9\text{Br}_2$   $[\text{M}-\text{H}]^+$ : 322.90655; found, 322.90871.

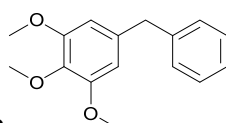

**5-benzyl-1,2,3-trimethoxybenzene**

Clear colorless liquid.  $^1\text{H}$  NMR (400 MHz,  $\text{CDCl}_3$ )  $\delta$  7.44 – 7.15 (m, 5H), 6.40 (s, 2H), 3.93 (s, 2H), 3.82 (s, 3H), 3.81 (s, 6H).  $^{13}\text{C}$  NMR (126 MHz,  $\text{CDCl}_3$ )  $\delta$  206.9, 153.2, 128.8, 128.5, 126.2, 105.9, 60.9, 56.0, 42.2, 30.9. IR wavenumber ( $\text{cm}^{-1}$ ) 2925.4, 1127.3, 1008.4. HRMS calc. for  $\text{C}_{16}\text{H}_{19}\text{O}_3$   $[\text{M}+\text{H}]^+$ : 259.13287; found, 259.13261.

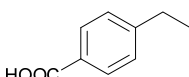

**4-propylbenzoic acid<sup>16</sup> (2s)**

White solid.  $^1\text{H}$  NMR (400 MHz,  $\text{CDCl}_3$ )  $\delta$  8.06 – 8.00 (m, 2H), 7.33 – 7.24 (m, 2H), 2.73 (q,  $J = 7.6$  Hz, 2H), 1.27 (t,  $J = 7.6$  Hz, 3H).  $^{13}\text{C}$  NMR (126 MHz,  $\text{CDCl}_3$ )  $\delta$  171.1, 150.8, 130.4, 128.0, 126.6, 29.0, 15.2.

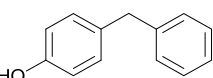

**4-benzylphenol<sup>17</sup> (2ta)**

White solid.  $^1\text{H}$  NMR (400 MHz,  $\text{CDCl}_3$ )  $\delta$  7.33 – 7.24 (m, 2H), 7.26 – 7.14 (m, 3H), 7.10 – 7.02 (m, 2H), 6.80 – 6.71 (m, 2H), 4.59 (s, 1H), 3.92 (s, 2H).  $^{13}\text{C}$  NMR (126 MHz,  $\text{CDCl}_3$ )  $\delta$  153.8, 141.5, 133.4, 130.1, 128.8, 128.4, 126.0, 115.3, 41.0.

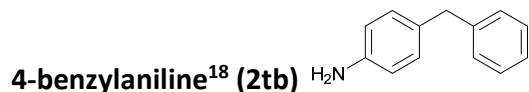

Clear colorless oil.  $^1\text{H}$  NMR (400 MHz,  $\text{CDCl}_3$ )  $\delta$  7.31 – 7.23 (m, 2H), 7.18 (td,  $J$  = 5.3, 2.8 Hz, 3H), 7.02 – 6.94 (m, 2H), 6.67 – 6.59 (m, 2H), 3.88 (s, 2H), 3.57 (s, 2H).  $^{13}\text{C}$  NMR (126 MHz,  $\text{CDCl}_3$ )  $\delta$  144.5, 141.9, 131.2, 129.8, 128.8, 128.3, 125.8, 115.3, 41.1.

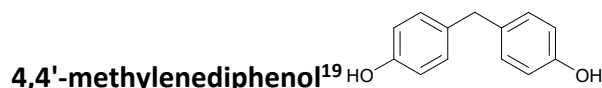

White solid.  $^1\text{H}$  NMR (400 MHz,  $\text{CD}_3\text{OD}$ )  $\delta$  7.08 – 6.82 (m, 4H), 6.82 – 6.41 (m, 4H), 3.75 (s, 2H).  $^{13}\text{C}$  NMR (126 MHz,  $\text{CD}_3\text{OD}$ )  $\delta$  156.5, 134.2, 130.7, 116.1, 41.1, 30.7.

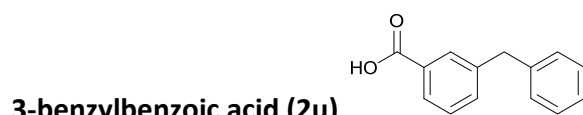

White solid.  $^1\text{H}$  NMR (400 MHz,  $\text{CDCl}_3$ )  $\delta$  7.94 (dt,  $J$  = 9.1, 1.7 Hz, 2H), 7.46 – 7.34 (m, 2H), 7.34 – 7.26 (m, 2H), 7.26 – 7.15 (m, 3H), 4.04 (s, 2H).  $^{13}\text{C}$  NMR (126 MHz,  $\text{CDCl}_3$ )  $\delta$  171.4, 141.6, 140.3, 134.3, 130.6, 129.6, 128.9, 128.7, 128.6, 128.1, 126.3, 41.7. IR wavenumber ( $\text{cm}^{-1}$ ) 3021.6, 299.9, 2916.2, 2849.6, 2671.3, 2561.5, 1683.0. HRMS calc. for  $\text{C}_{14}\text{H}_{12}\text{NaO}_2$  [ $\text{M}+\text{Na}$ ] $^+$ : 235.0730; found, 235.0725.

## VII. References

1. W. Xu and R. Langer, *Dalton Trans.*, 2015, **44**, 16785-16790.
2. T. C. Fessard, H. Motoyoshi and E. M. Carreira, *Angew. Chem. Int. Ed.*, 2007, **46**, 2078-2081.
3. Y. Yuan and Y. Bian, *Appl. Organomet. Chem.*, 2008, **22**, 15-18.
4. a) F. Nador, Y. Moglie, C. Vitale, M. Yus, F. Alonso and G. Radivoy, *Tetrahedron*, 2010, **66**, 4318-4325. b) X. Wu and A. E. V. Gorden, *Eur. J. Org. Chem.*, 2009, **2009**, 503-509.
5. D. R. Crist, G. J. Jordan, D. W. Moore, J. A. Hashmall, A. P. Borsetti and S. A. Turujman, *J. Am. Chem. Soc.*, 1983, **105**, 4136-4142.
6. M. Peña-López, M. Ayán-Varela, L. A. Sarandeses and J. Pérez Sestelo, *Eur. J. Chem.*, 2010, **16**, 9905-9909.
7. G. Sun and Z. Wang, *Tetrahedron Lett.*, 2008, **49**, 4929-4932.
8. O. Masato and K. Ryoichi, *Chem. Lett.*, 2008, **37**, 796-797.
9. C. C. Kofink and P. Knochel, *Org. Lett.*, 2006, **8**, 4121-4124.
10. T. Niwa, H. Yorimitsu and K. Oshima, *Angew. Chem. Int. Ed.*, 2007, **46**, 2643-2645.
11. H. S. Park, H. Y. Lee and Y. H. Kim, *Org. Lett.*, 2005, **7**, 3187-3190.
12. A. Bramborg and T. Linker, *Adv. Synth. Catal.*, 2010, **352**, 2195-2199.
13. M. J. Burns, I. J. S. Fairlamb, A. R. Kapdi, P. Sehnal and R. J. K. Taylor, *Org. Lett.*, 2007, **9**, 5397-5400.
14. Y. Chang, H. Lee and C. Bae, in *Organic Syntheses*, pp. 245-252.
15. J. R. Coats, J. W. Williams, C. Chang, A.-H. Lee and R. L. Metcalf, *Environ. Toxicol. Chem.*, 1989, **8**, 45-52.
16. K. Nemoto, H. Yoshida, N. Egusa, N. Morohashi and T. Hattori, *J. Org. Chem.*, 2010, **75**, 7855-7862.
17. C.-R. Chen, S. Zhou, D. B. Biradar and H.-M. Gau, *Adv. Synth. Catal.*, 2010, **352**, 1718-1727.

18. G. Manolikakes, C. Muñoz Hernandez, M. A. Schade, A. Metzger and P. Knochel, *J. Org. Chem.*, 2008, **73**, 8422-8436.
19. T. H. Fisher, P. Chao, C. G. Upton and A. J. Day, *Magnetic Resonance in Chemistry*, 1995, **33**, 717-723.

### VIII. Copies of <sup>1</sup>H NMR and <sup>13</sup>C NMR

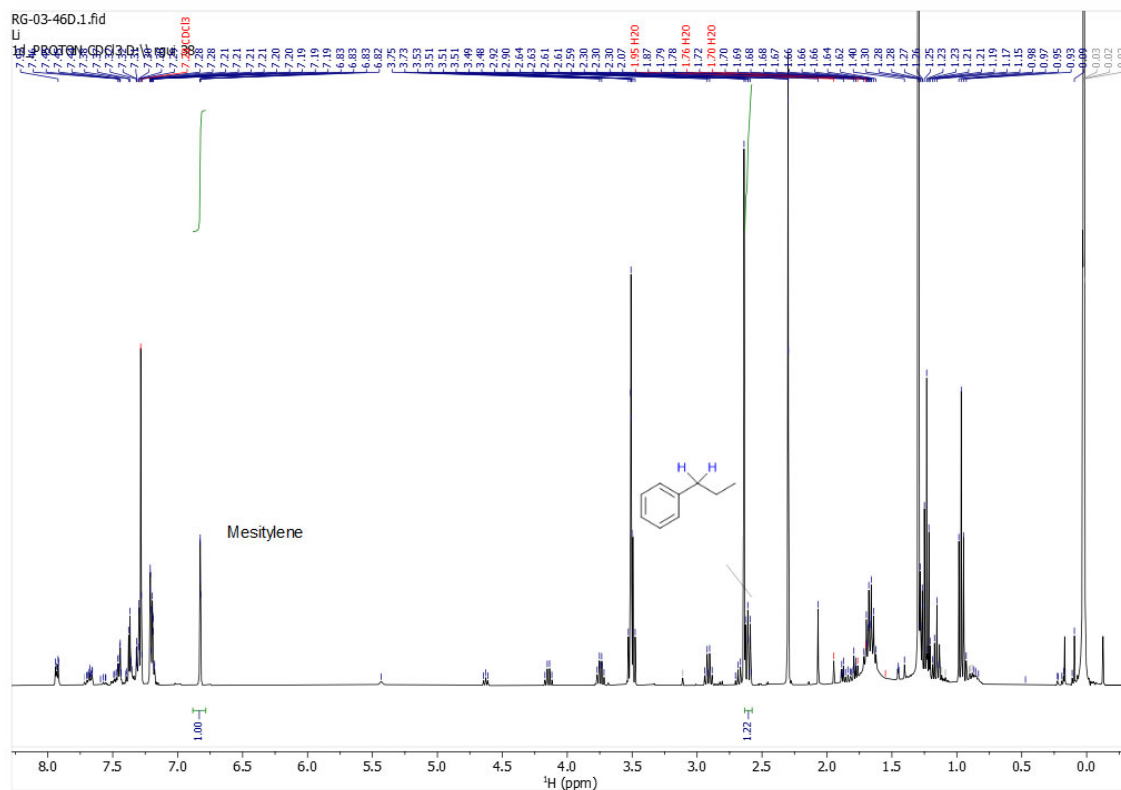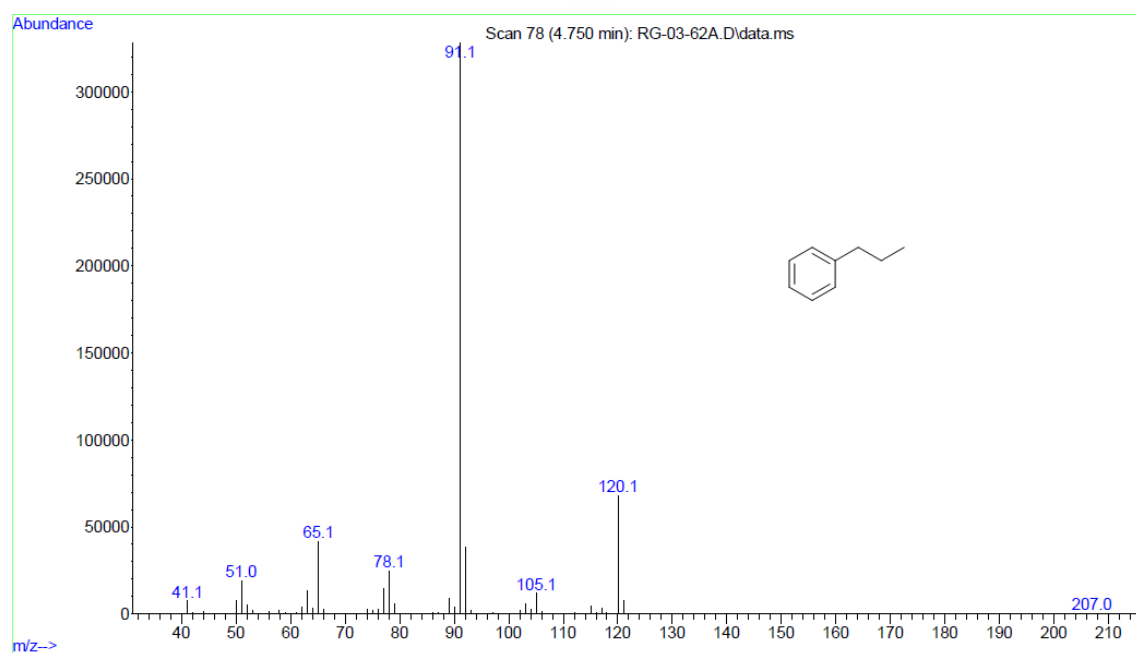

20220325\_RG-03-60C-F1\_PROTON\_01  
RG-03-60C-F1

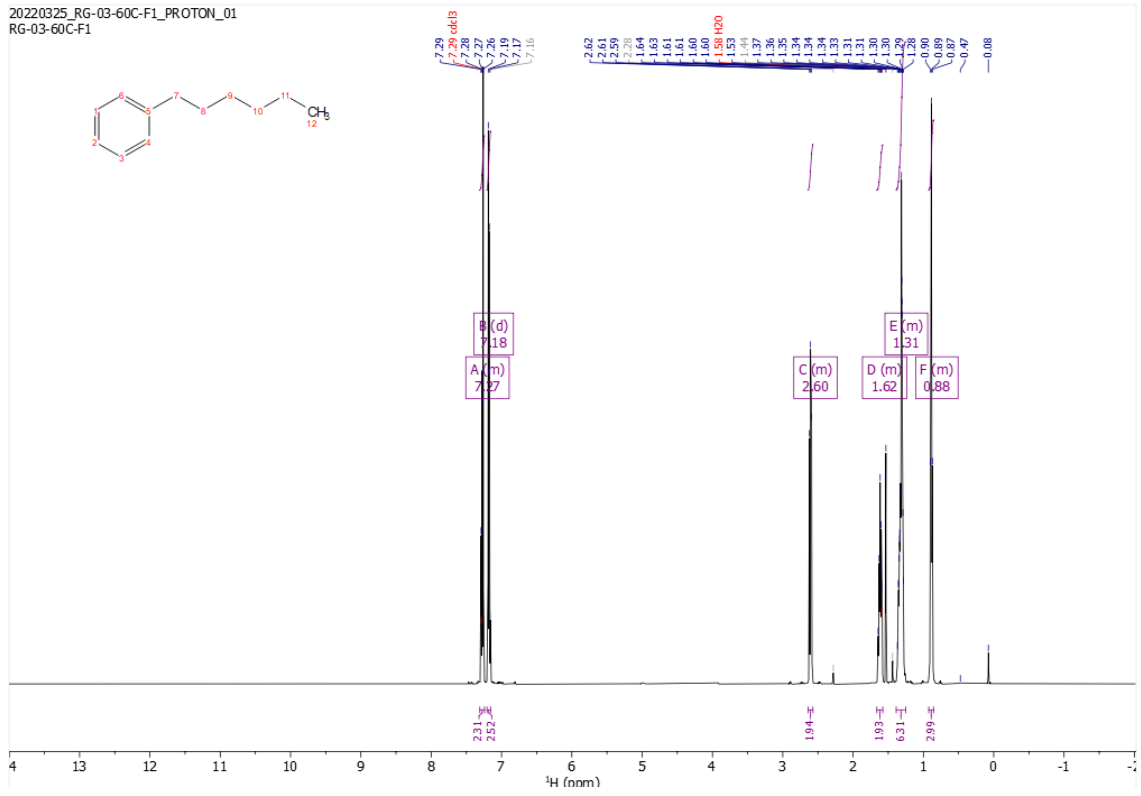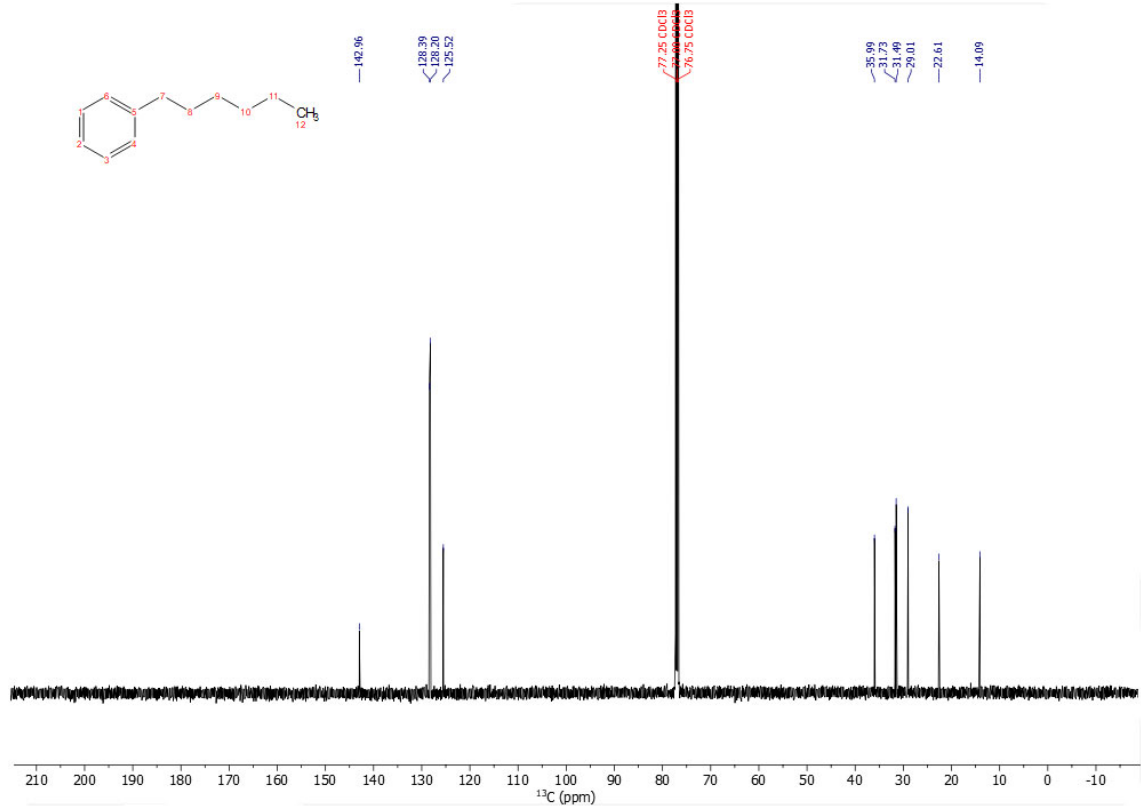



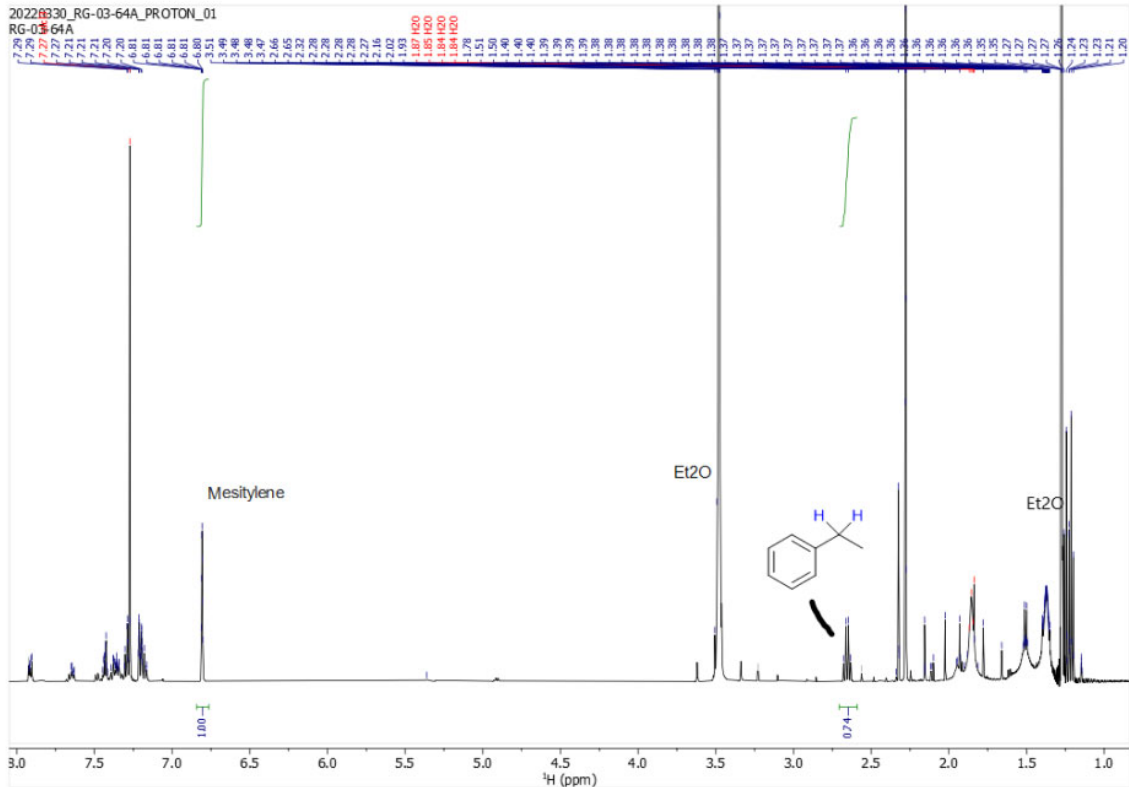

RG-03-64D-F10.1.fid  
L  
1d\_PROTON CDCl3 D:\\rgui 24

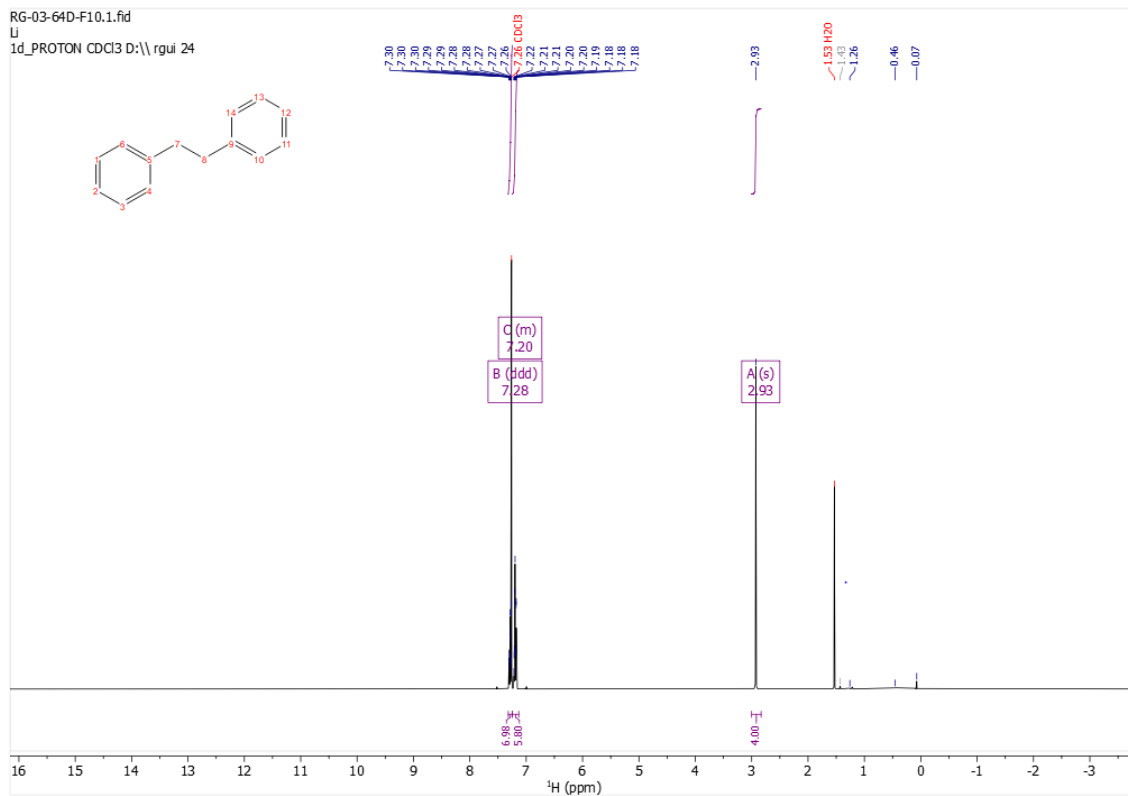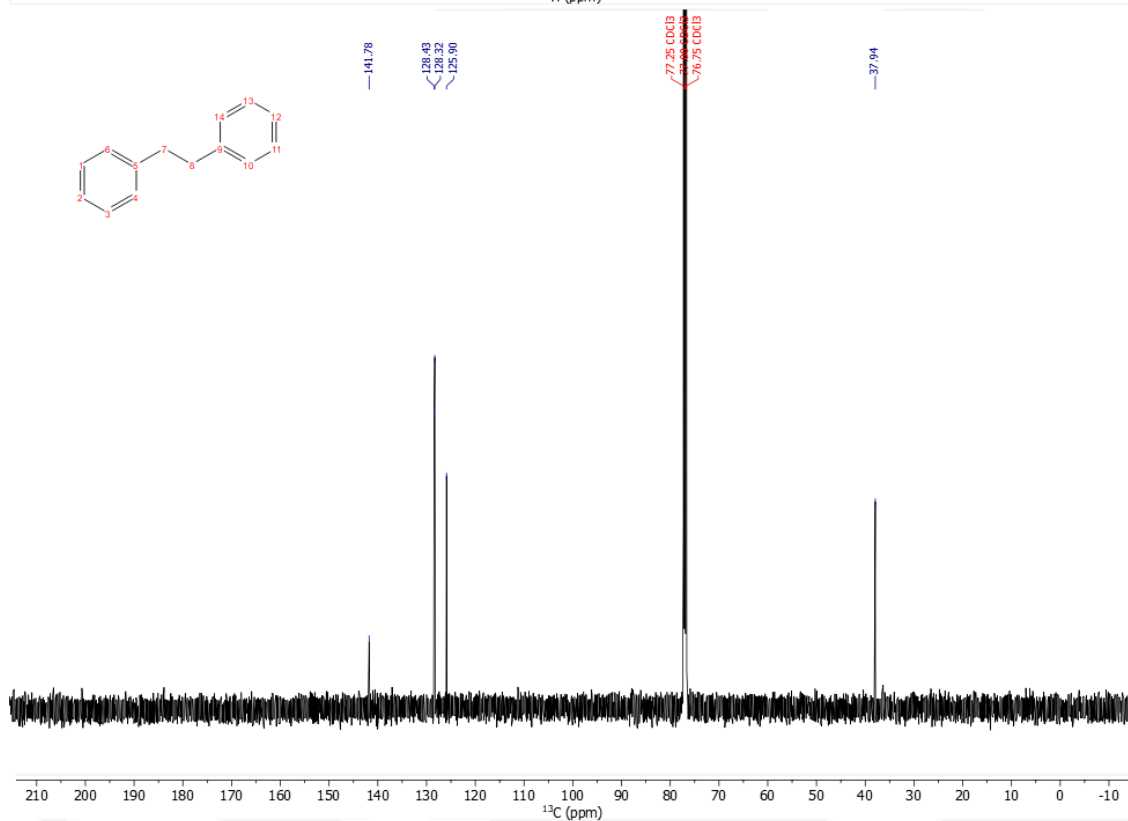

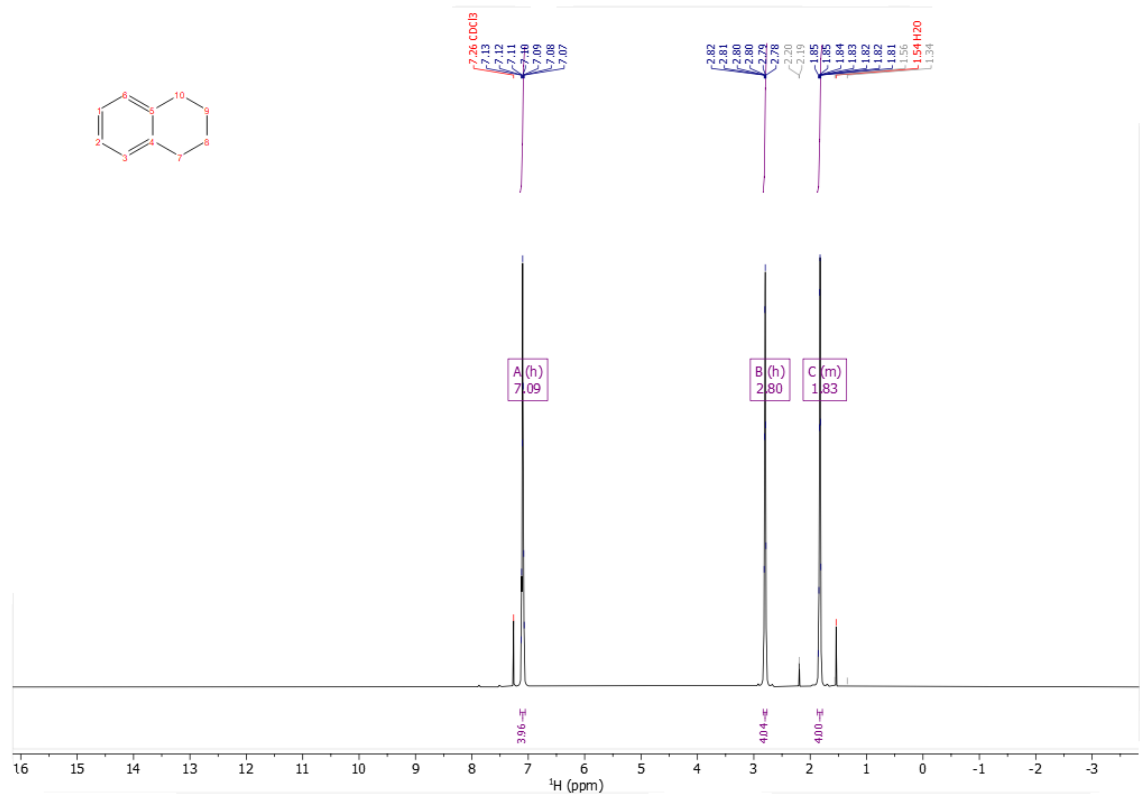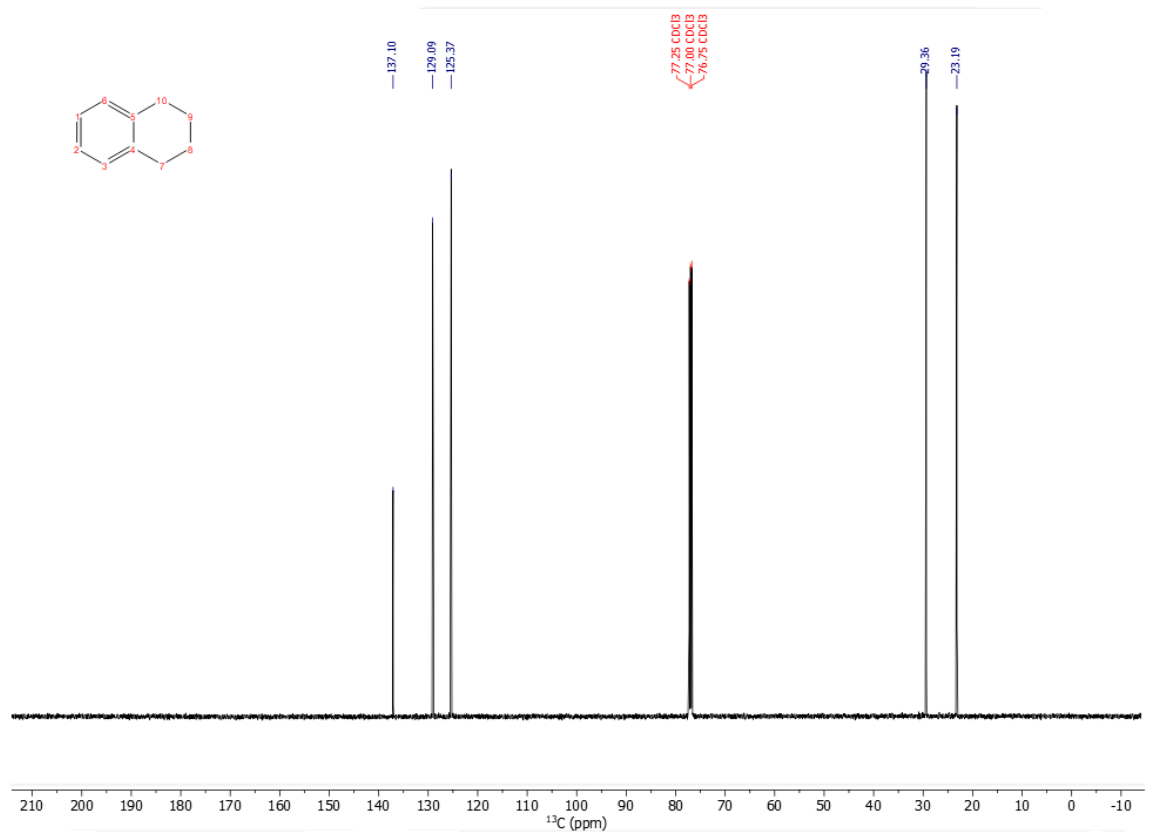

20220517\_RG-03-82E\_PROTON\_01  
RG-03-82E

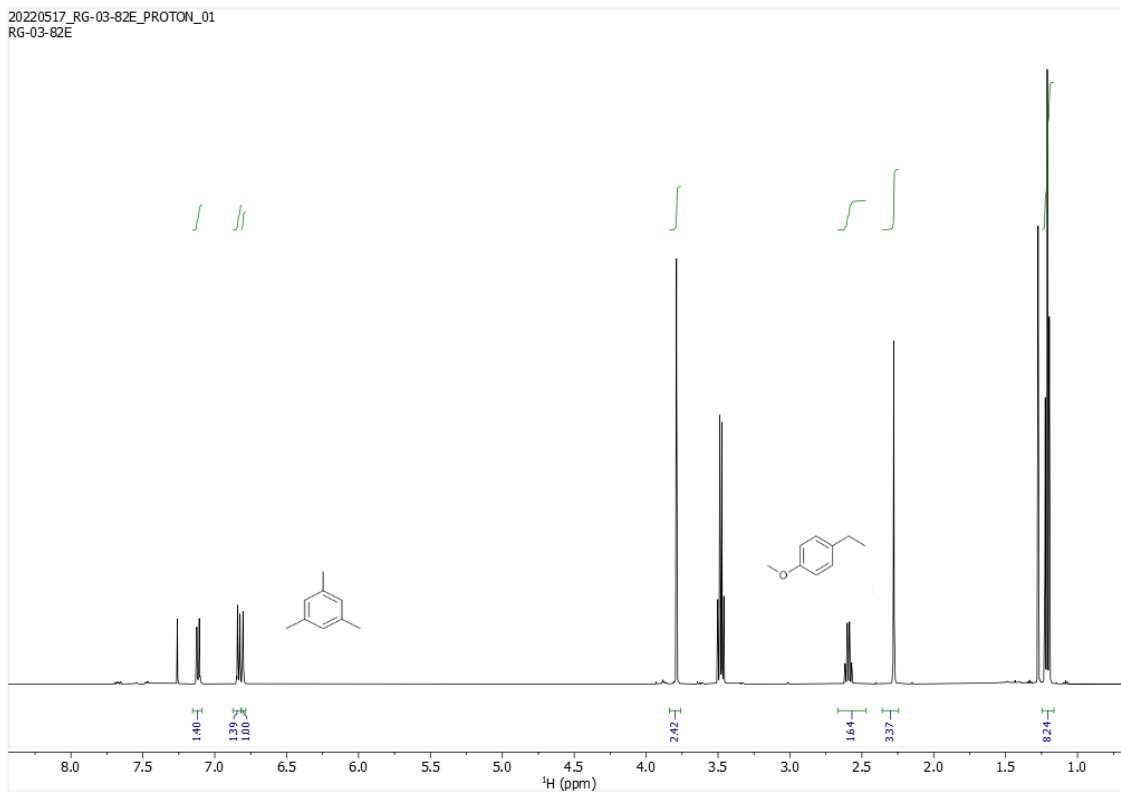

RG-03-83H-F1\_PROTON\_01  
RG-03-83H-F1

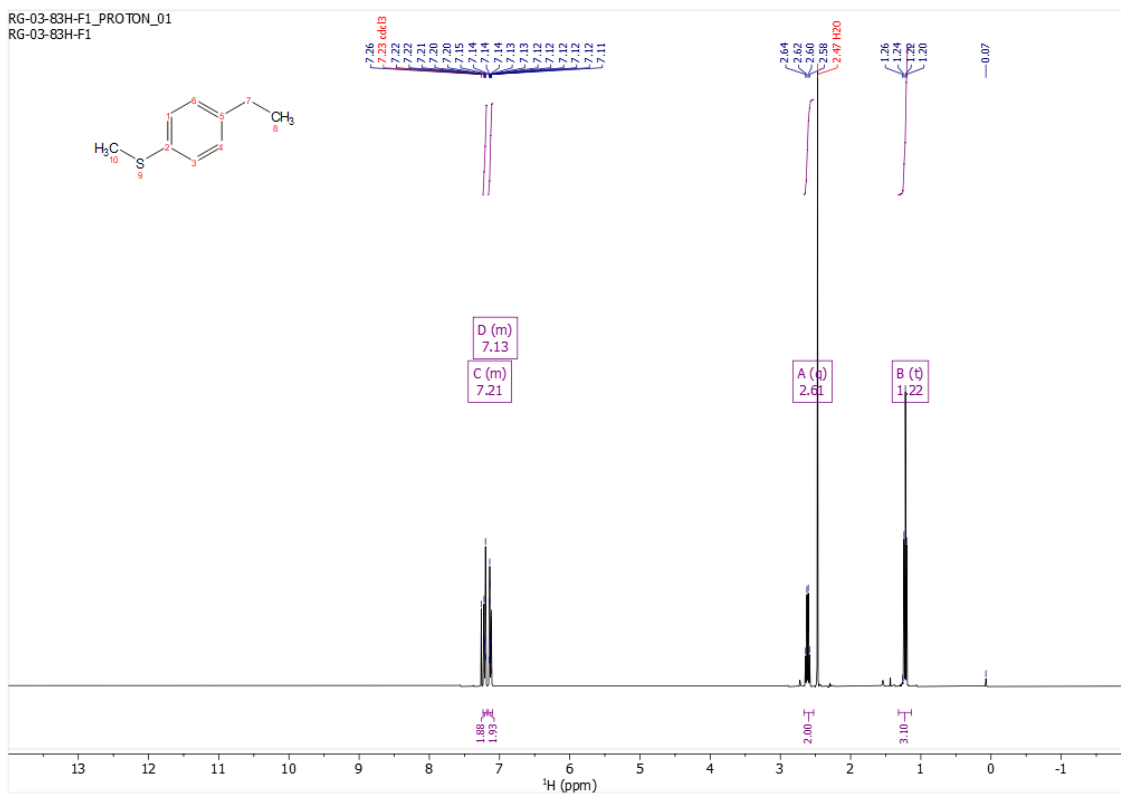

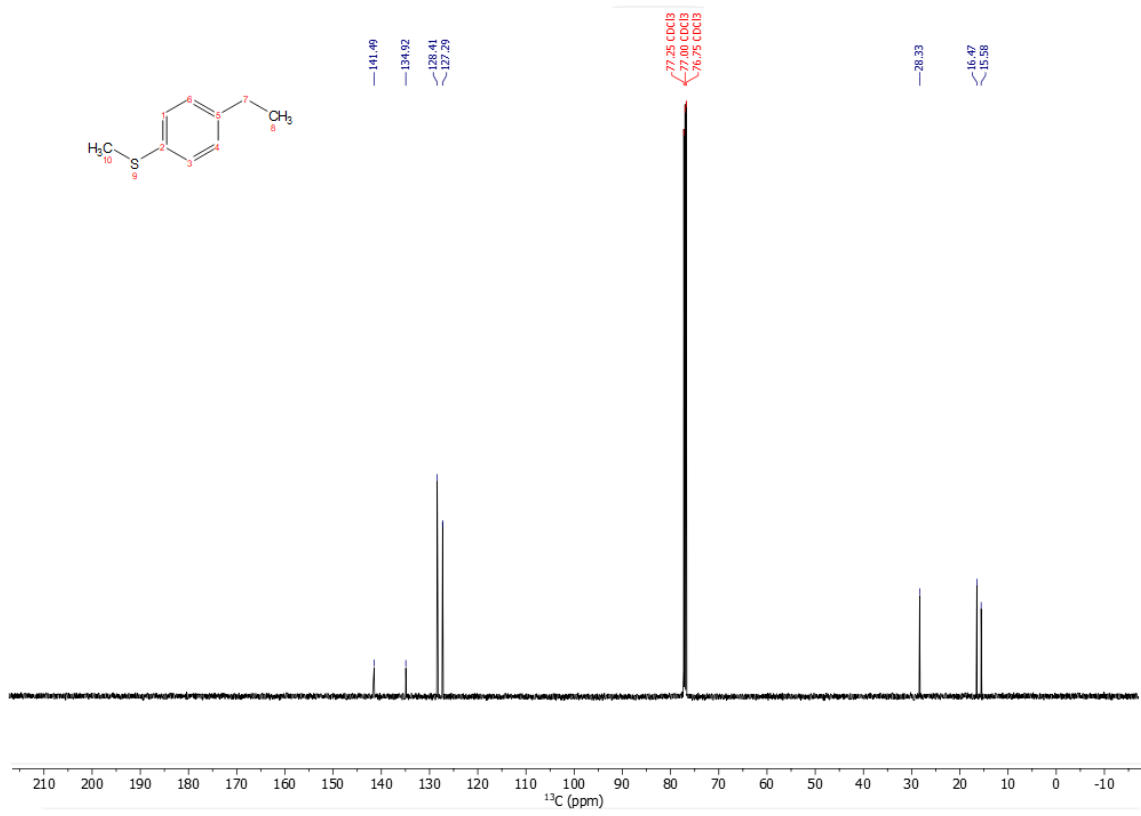

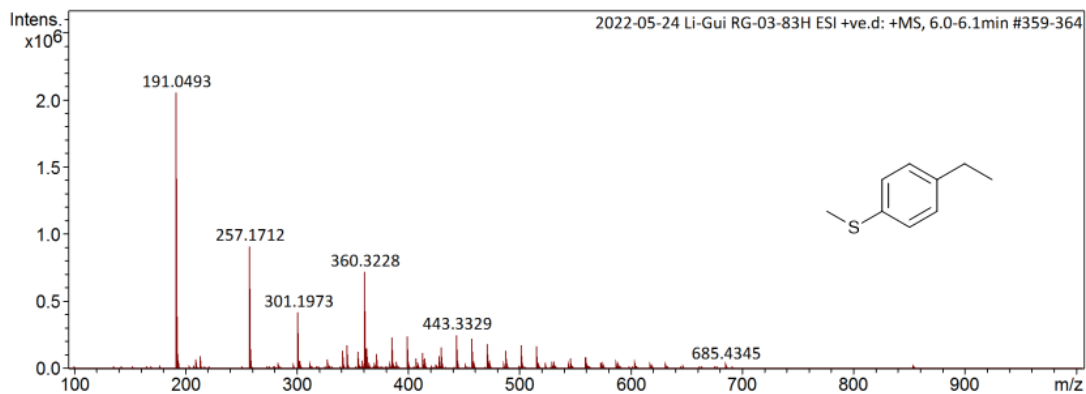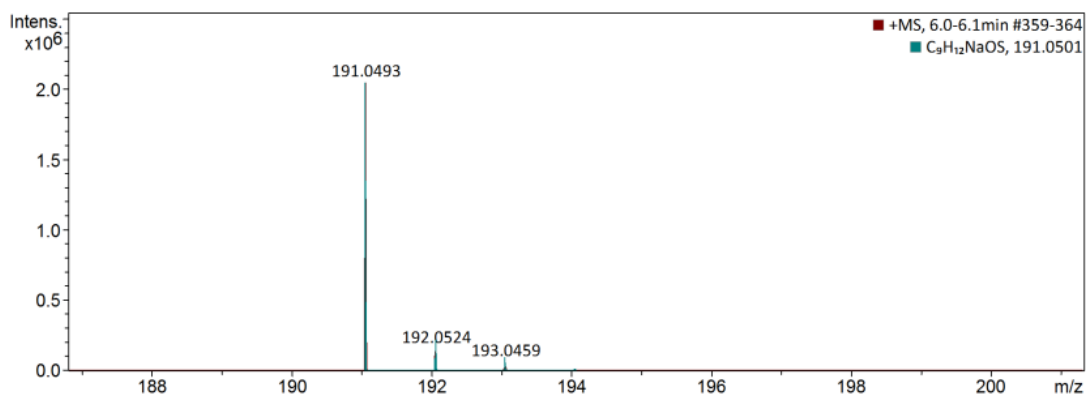

| Meas. m/z | # | Ion Formula                                                    | m/z      | err [ppm] | mSigma | # mSigma | Score  | rdb | e <sup>-</sup> Conf | N-Rule |
|-----------|---|----------------------------------------------------------------|----------|-----------|--------|----------|--------|-----|---------------------|--------|
| 191.0493  | 1 | C <sub>6</sub> H <sub>11</sub> N <sub>2</sub> O <sub>3</sub> S | 191.0485 | -4.2      | 14.0   | 1        | 100.00 | 2.5 | even                | ok     |
|           | 1 | C <sub>9</sub> H <sub>12</sub> NaOS                            | 191.0501 | 4.2       | 21.7   | 1        | 100.00 | 3.5 | even                | ok     |

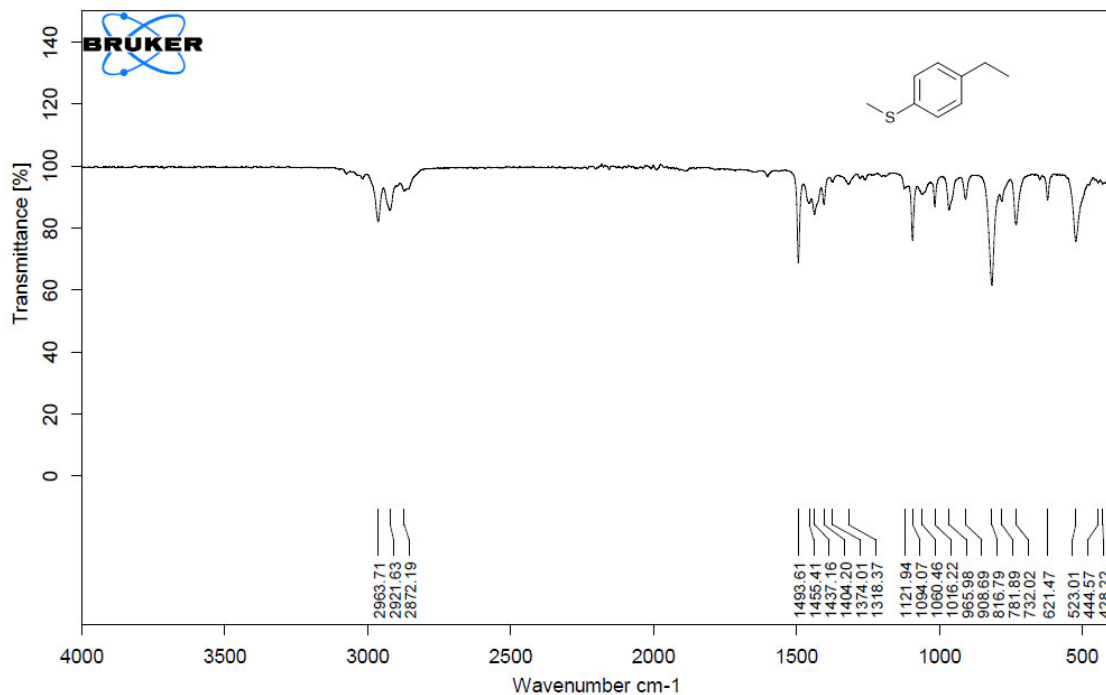

RG-03-84E-F3.1.fid  
1d\_PROTON CDCl3 D:\\rgui 130

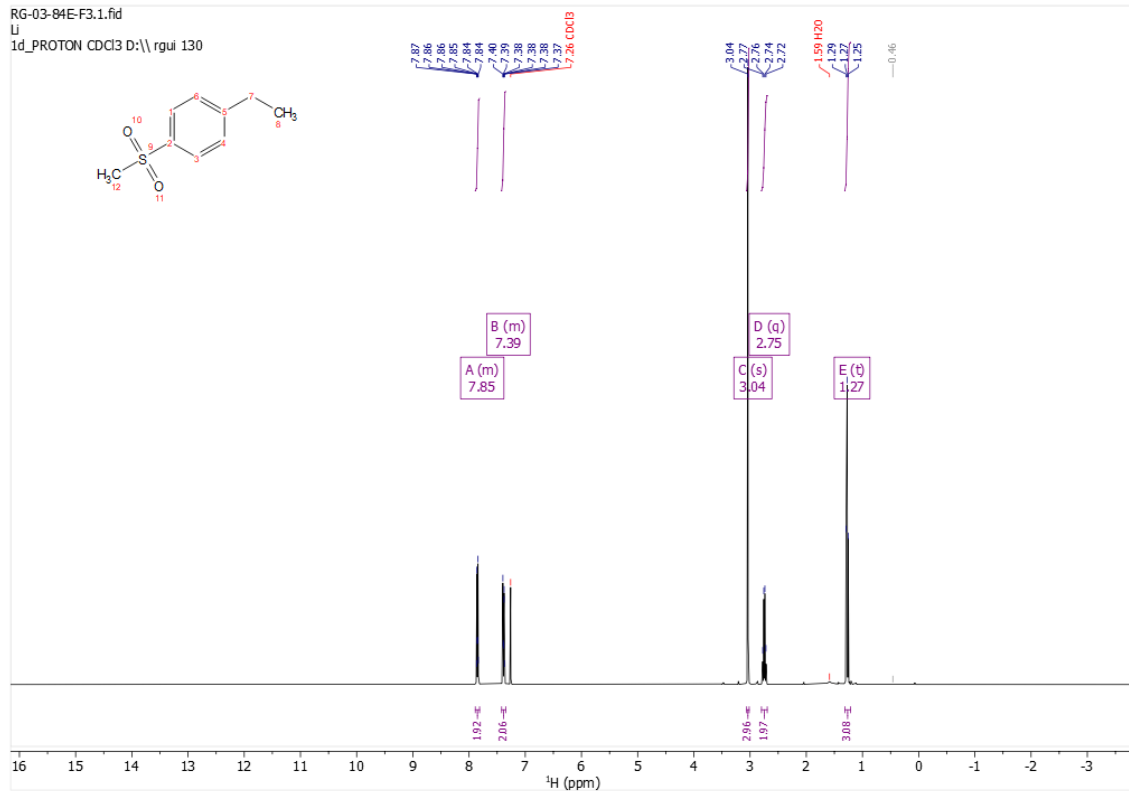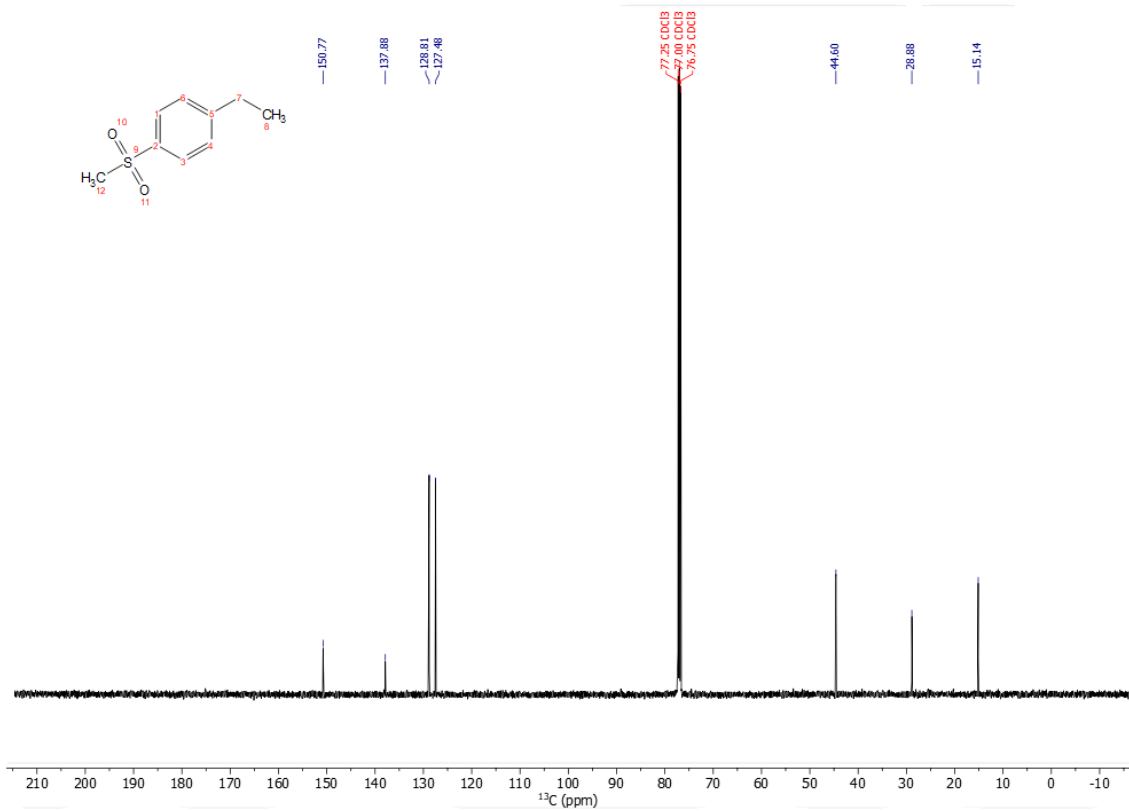

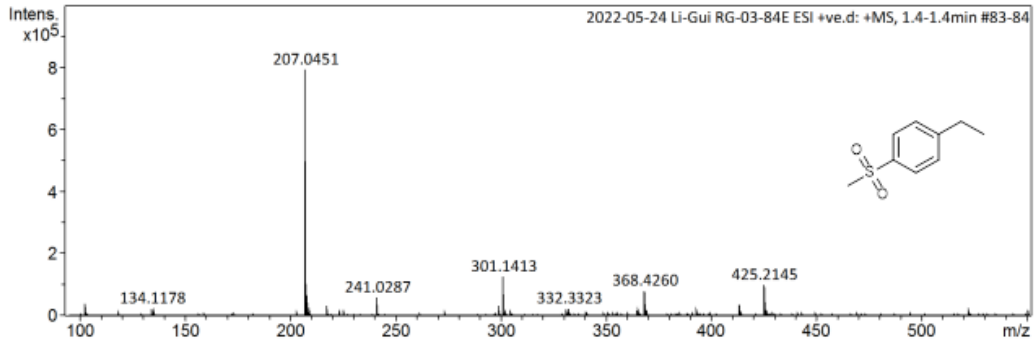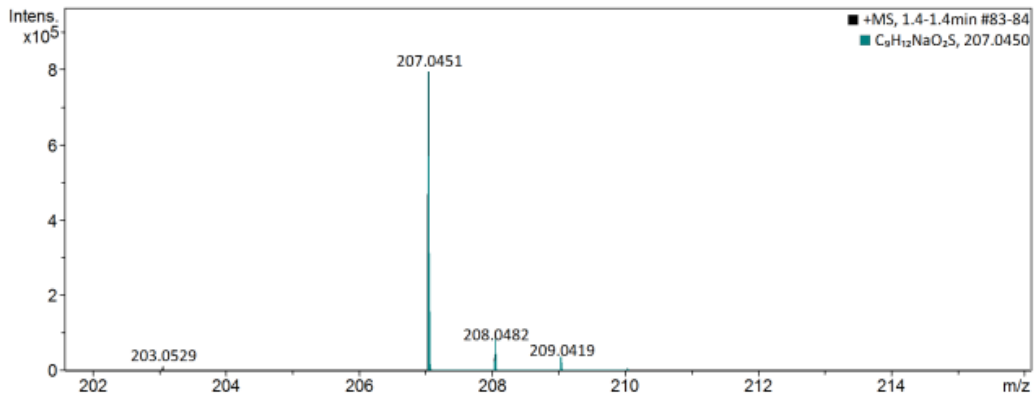

| Meas. m/z | # | Ion Formula                                                    | m/z      | err [ppm] | mSigma | # mSigma | Score  | rdb | e <sup>-</sup> Conf | N-Rule |
|-----------|---|----------------------------------------------------------------|----------|-----------|--------|----------|--------|-----|---------------------|--------|
| 207.0451  | 1 | C <sub>6</sub> H <sub>11</sub> N <sub>2</sub> O <sub>4</sub> S | 207.0434 | -8.0      | 14.7   | 1        | 49.46  | 2.5 | even                | ok     |
|           | 2 | C <sub>7</sub> H <sub>7</sub> N <sub>6</sub> S                 | 207.0447 | -1.5      | 17.6   | 2        | 100.00 | 7.5 | even                | ok     |
|           | 1 | C <sub>9</sub> H <sub>12</sub> NaO <sub>2</sub> S              | 207.0450 | -0.2      | 19.6   | 1        | 100.00 | 3.5 | even                | ok     |

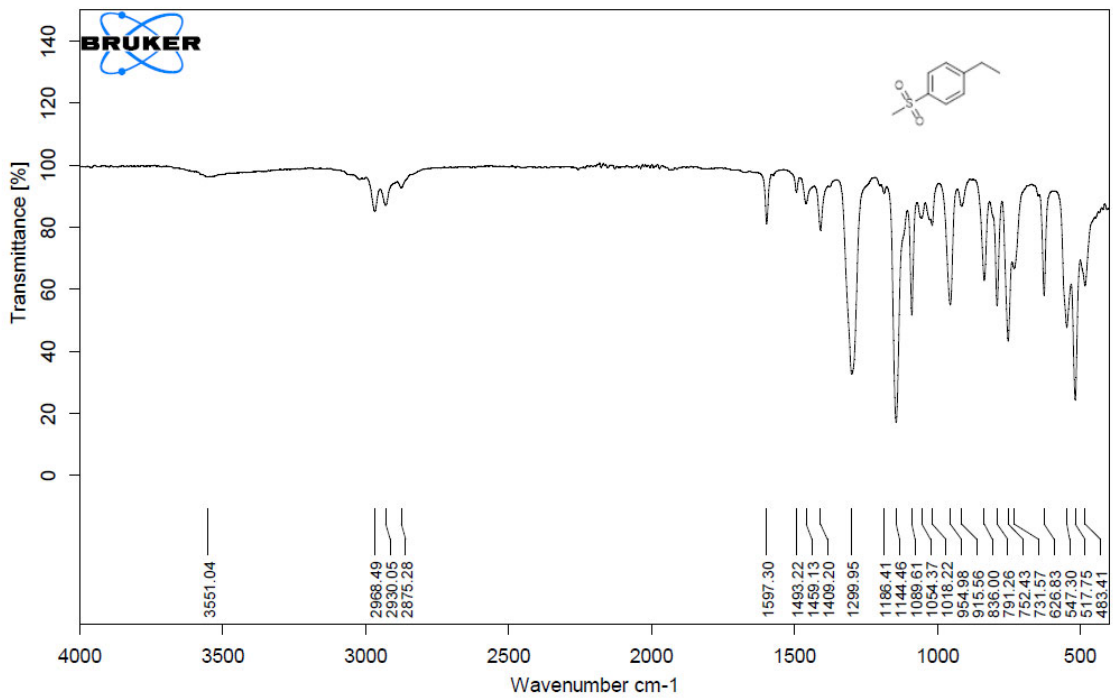



20220525\_RG-03-85E\_PROTON\_01  
RG-03-85E

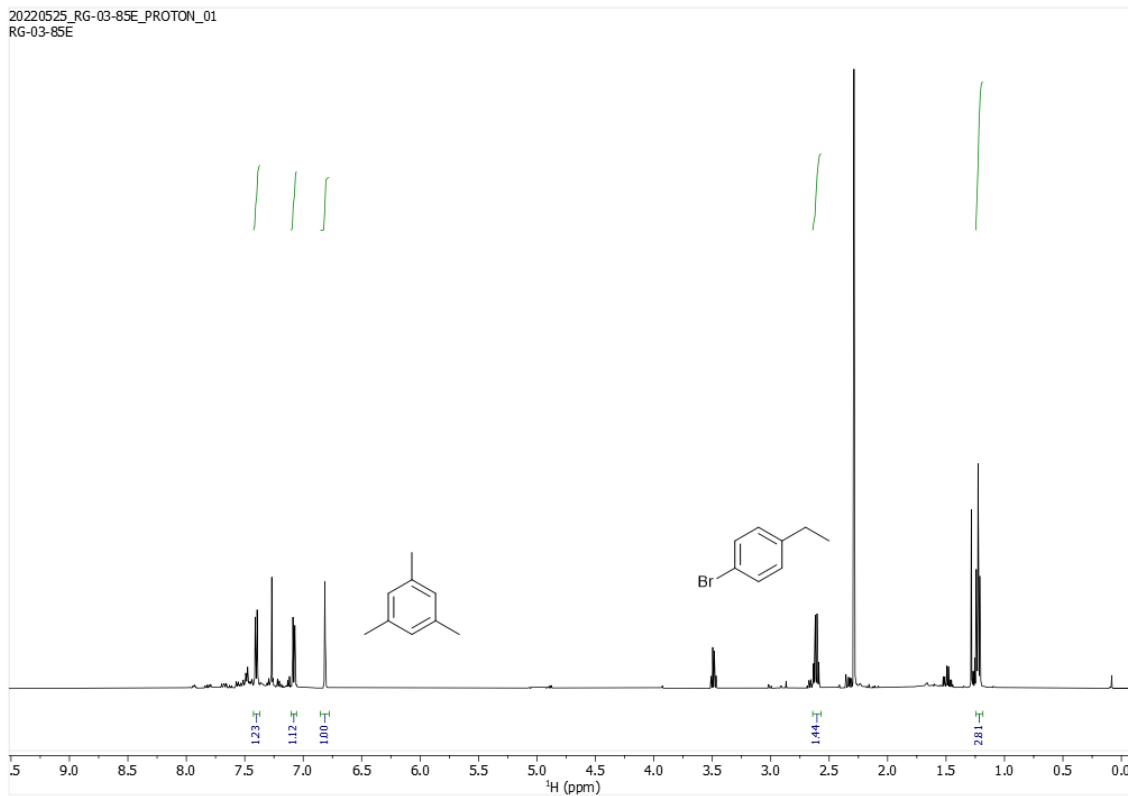

RG-01-031F3-pure.1.fid  
U  
1d\_PROTON CDCl3 C:\\ rgu1 9

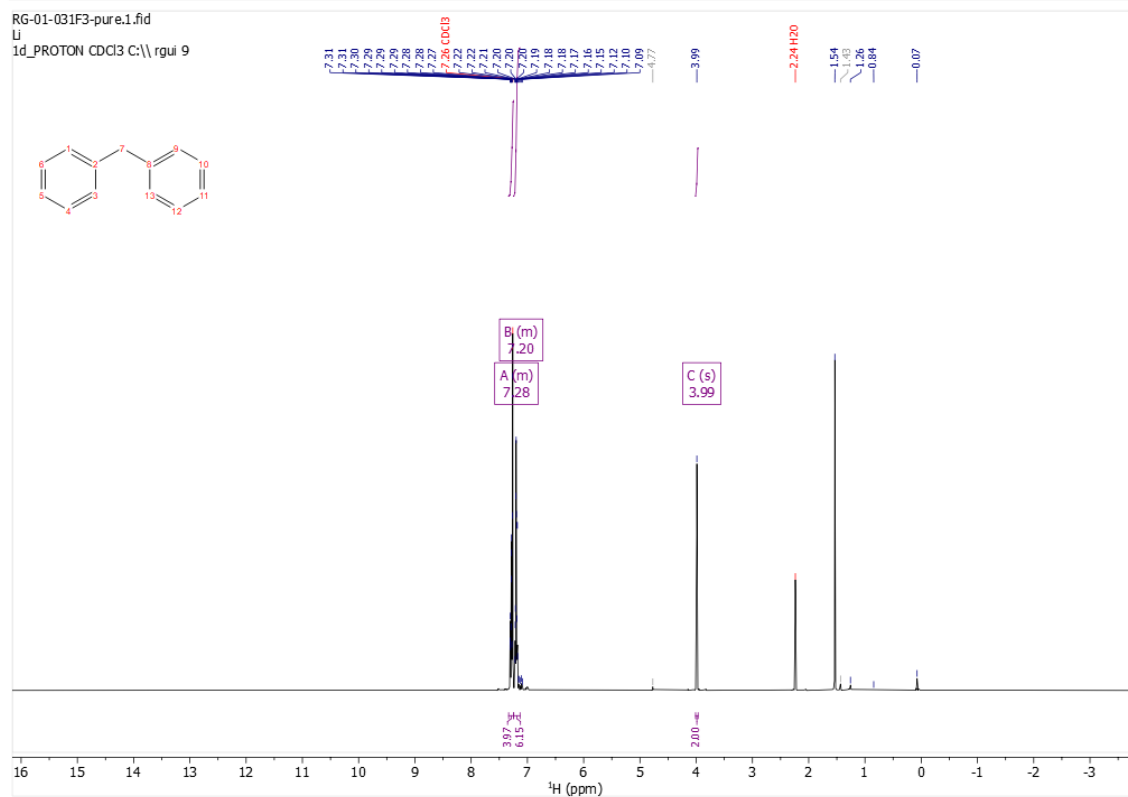

RG-01-024Dpure.1.fid  
L  
Id\_C13 CDCl3 C:\rgui 202

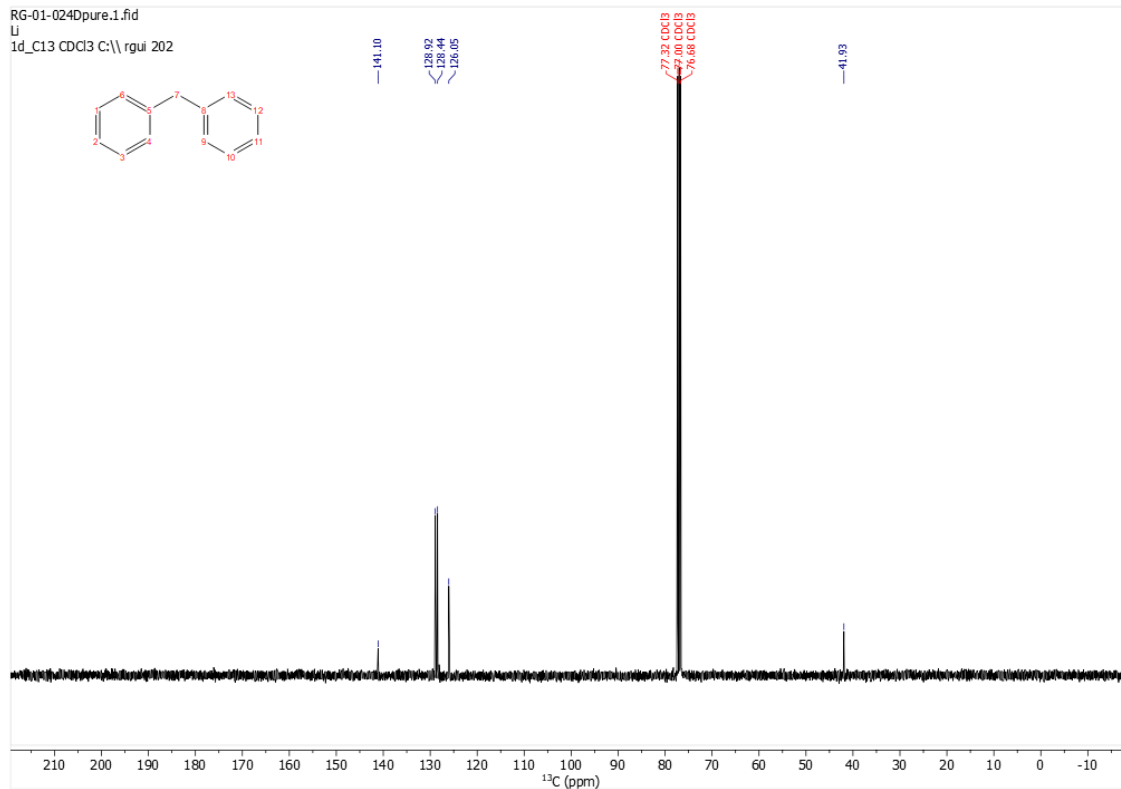

RG-03-56CF1.1.fid  
L  
Id\_PROTON CDCl3 D:\rgui 18

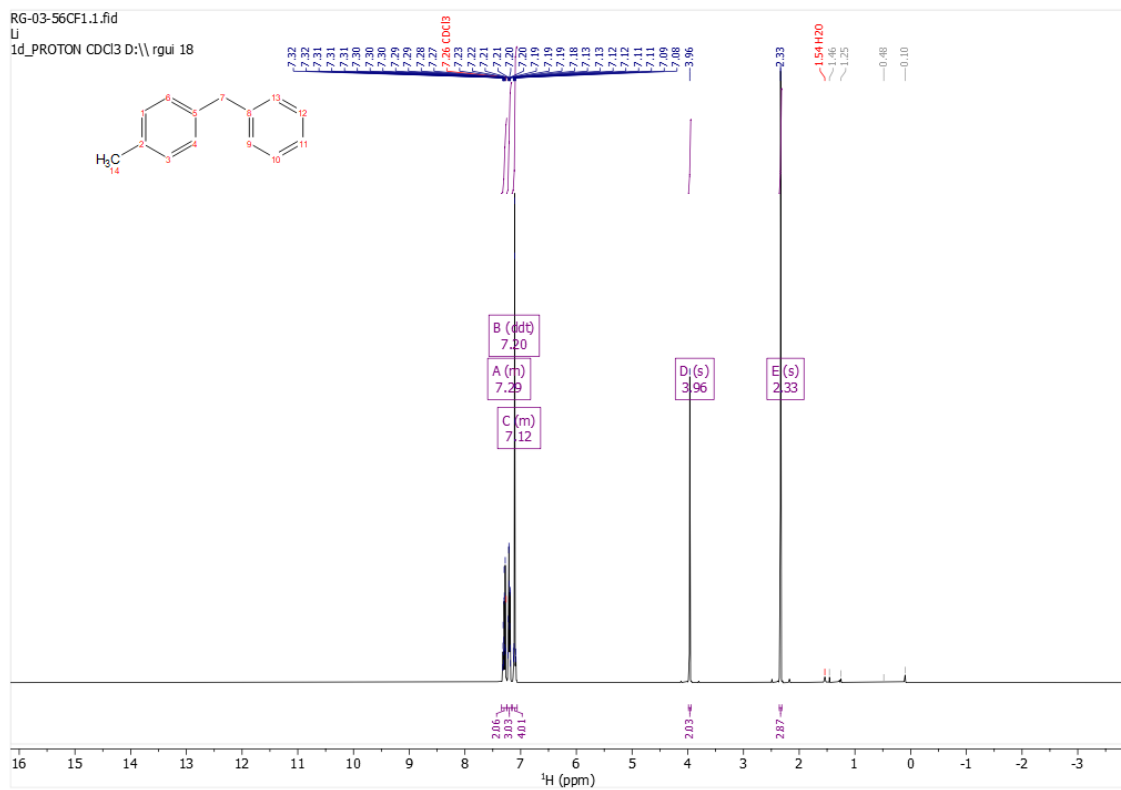

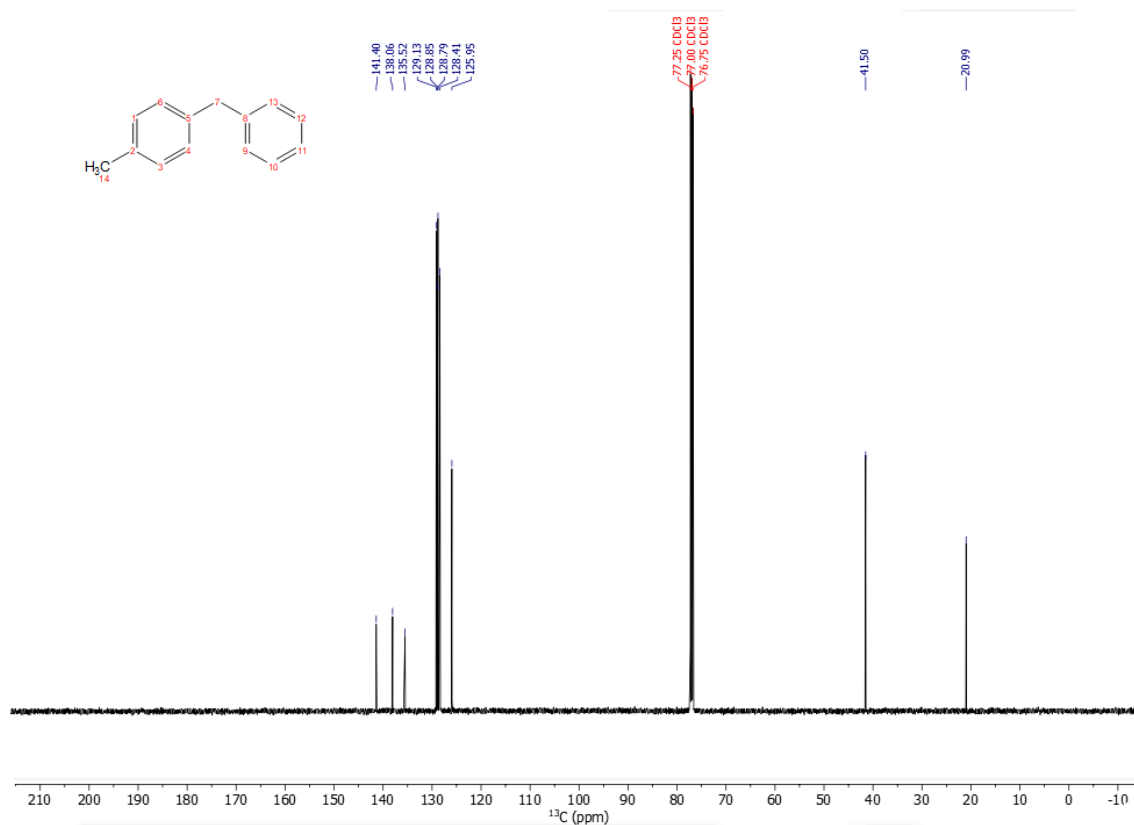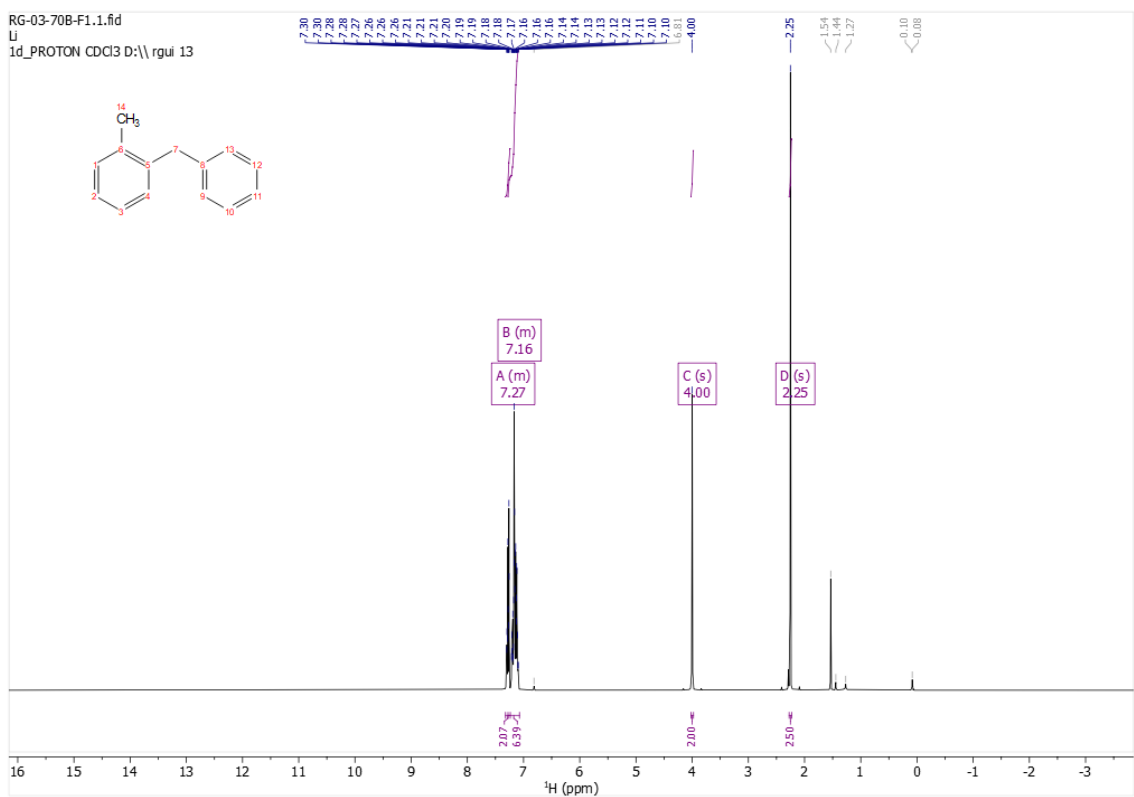

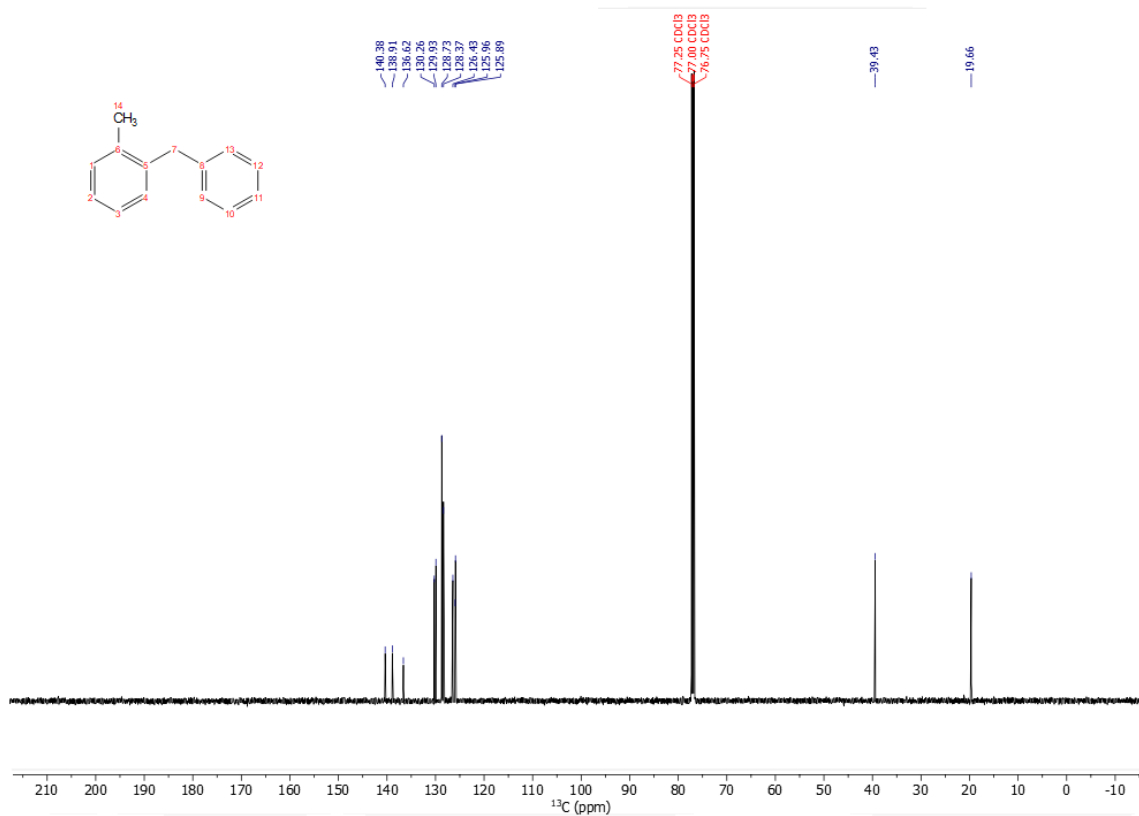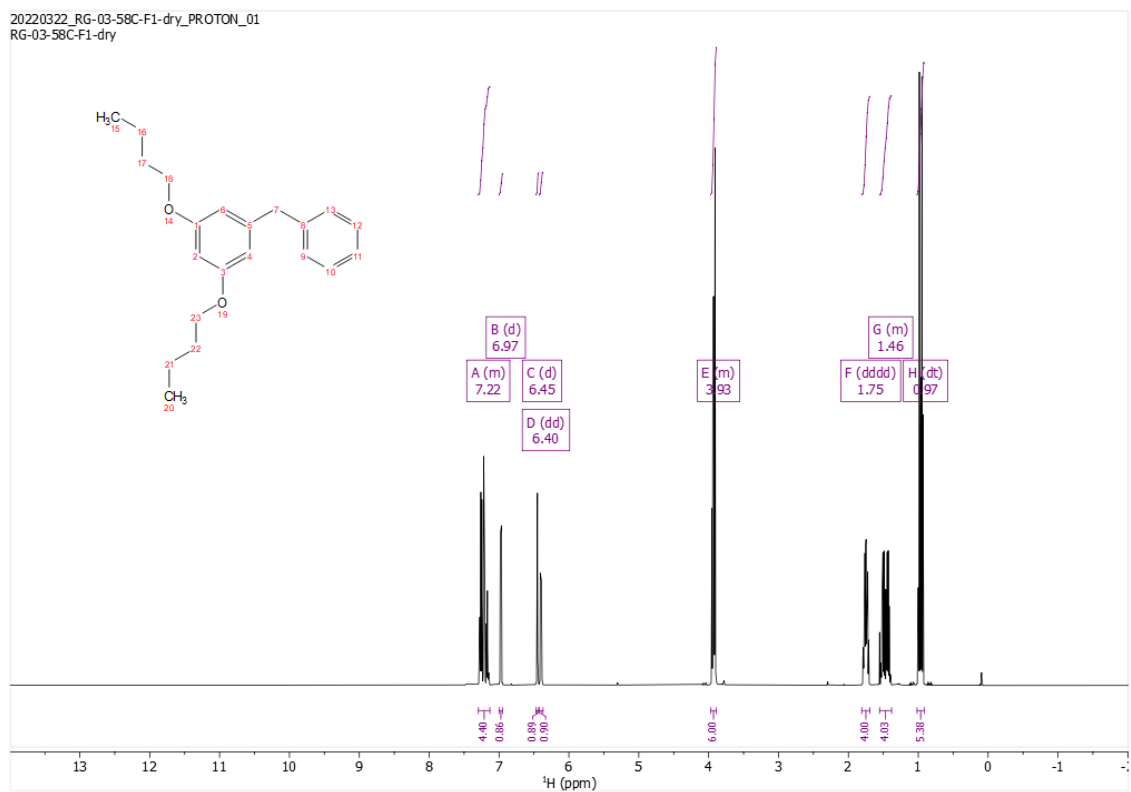

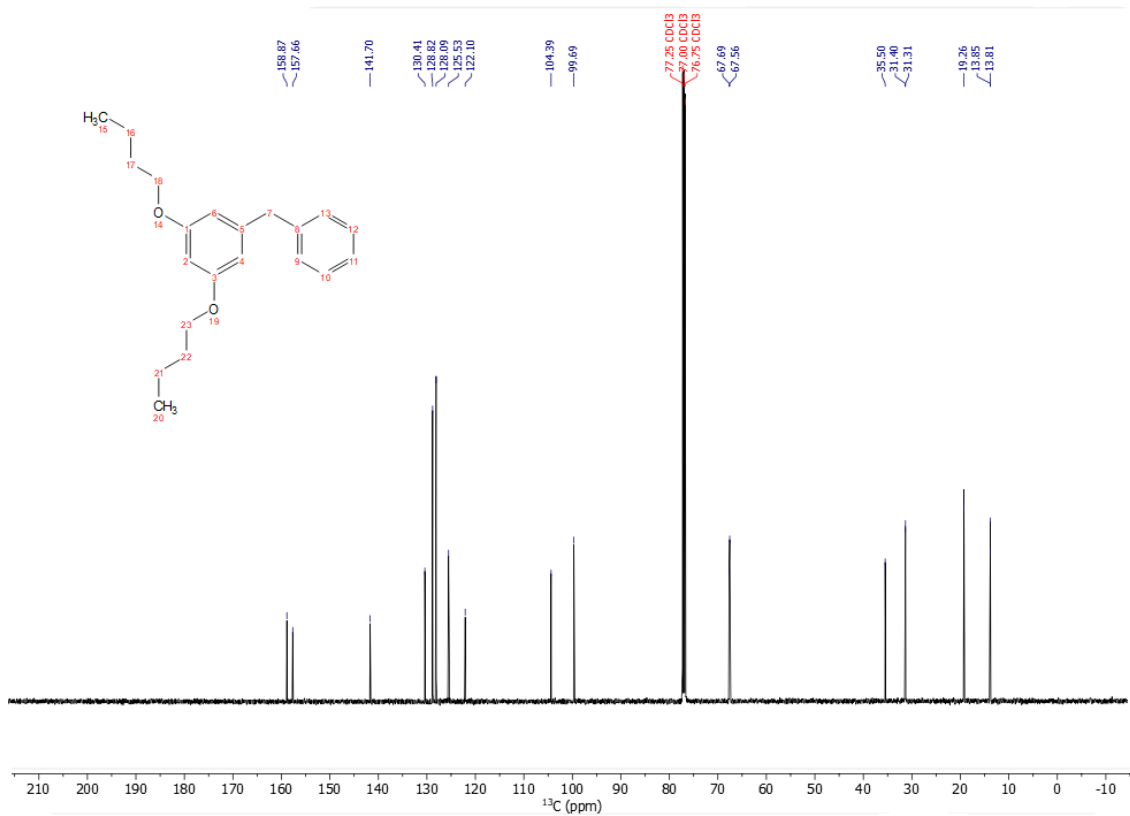

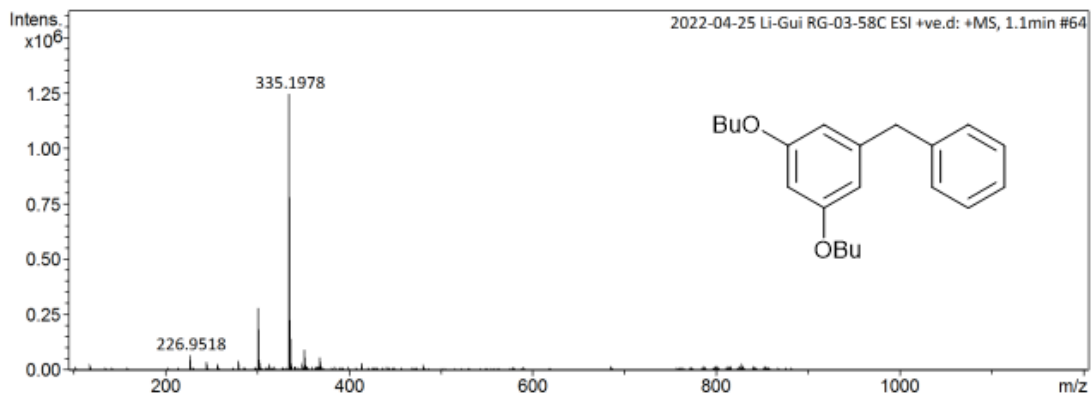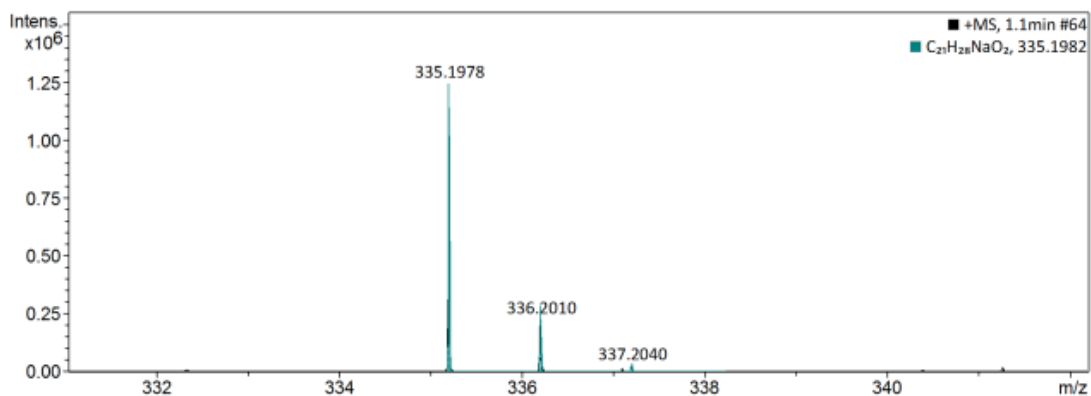

| Meas. m/z | # | Ion Formula                                                   | m/z      | err [ppm] | mSigma | # mSigma | Score  | rdb  | e <sup>-</sup> Conf | N-Rule |
|-----------|---|---------------------------------------------------------------|----------|-----------|--------|----------|--------|------|---------------------|--------|
| 335.1978  | 1 | C <sub>18</sub> H <sub>27</sub> N <sub>2</sub> O <sub>4</sub> | 335.1965 | -3.7      | 15.9   | 1        | 74.16  | 6.5  | even                | ok     |
|           | 2 | C <sub>19</sub> H <sub>23</sub> N <sub>6</sub>                | 335.1979 | 0.3       | 28.9   | 2        | 100.00 | 11.5 | even                | ok     |
|           | 1 | C <sub>21</sub> H <sub>28</sub> NaO <sub>2</sub>              | 335.1982 | 1.1       | 29.9   | 1        | 100.00 | 7.5  | even                | ok     |

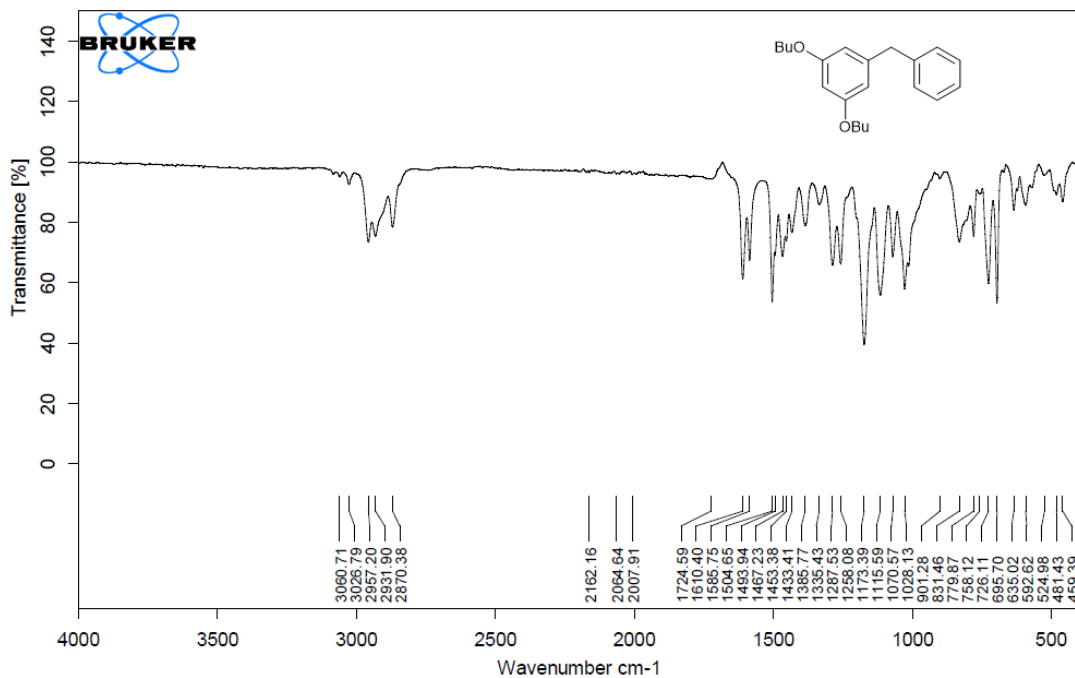



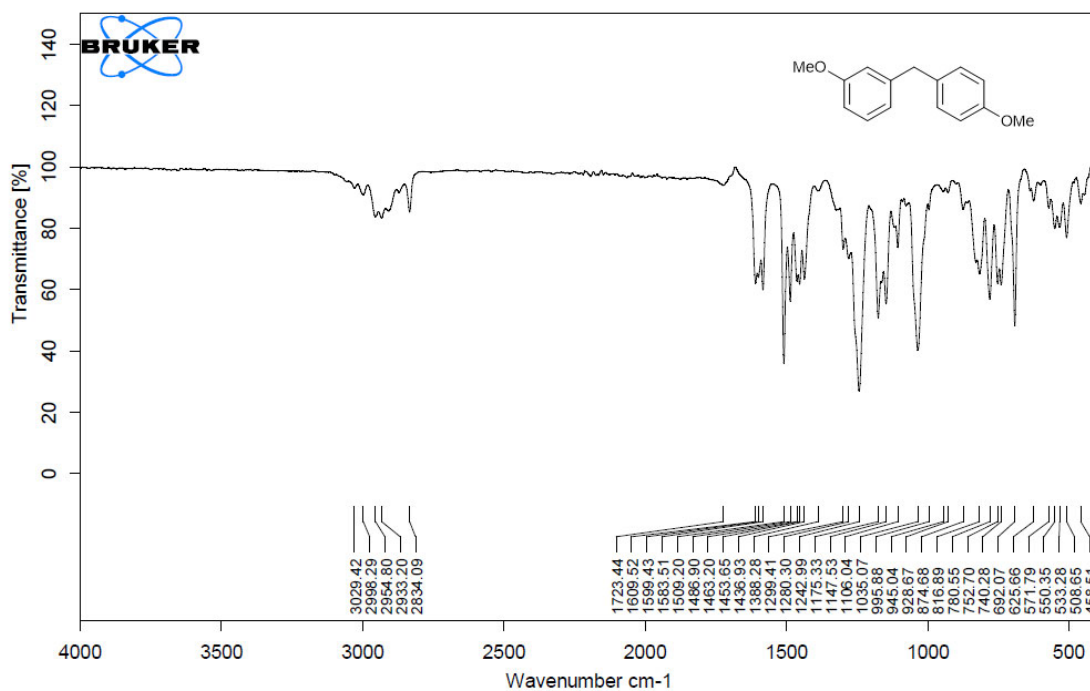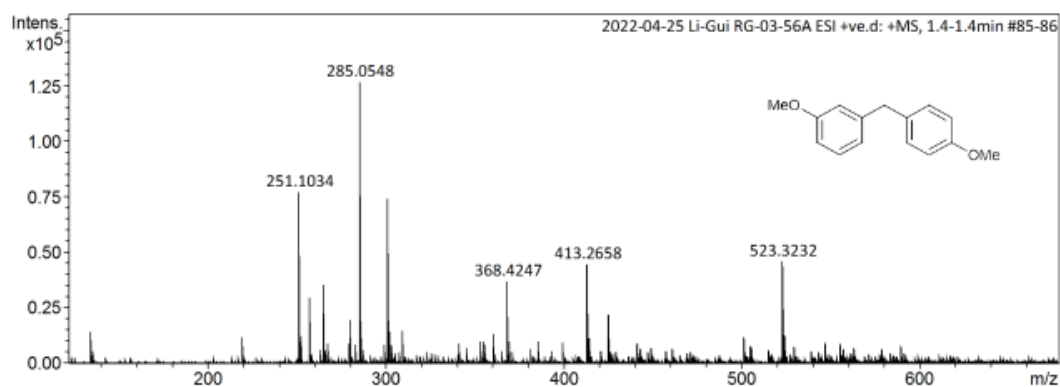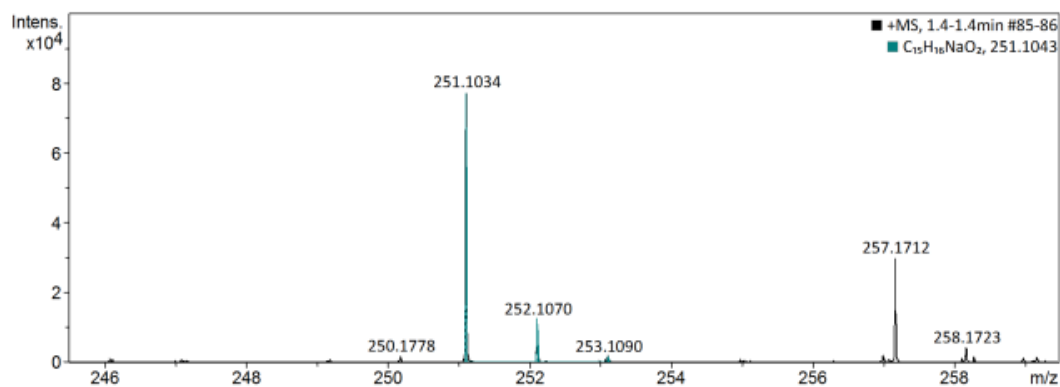

| Meas. m/z | # | Ion Formula | m/z      | err [ppm] | mSigma | # mSigma | Score  | rdb  | e <sup>-</sup> Conf | N-Rule |
|-----------|---|-------------|----------|-----------|--------|----------|--------|------|---------------------|--------|
| 251.1034  | 1 | C13H11N6    | 251.1040 | 2.1       | 5.4    | 1        | 100.00 | 11.5 | even                | ok     |
|           | 2 | C12H15N2O4  | 251.1026 | -3.2      | 9.5    | 2        | 81.05  | 6.5  | even                | ok     |
|           | 1 | C15H16NaO2  | 251.1043 | 3.2       | 4.8    | 1        | 100.00 | 7.5  | even                | ok     |



RG-03-56F-F1.1.fid  
U  
1d\_PROTON CDCl3 D:\\ rguil 37

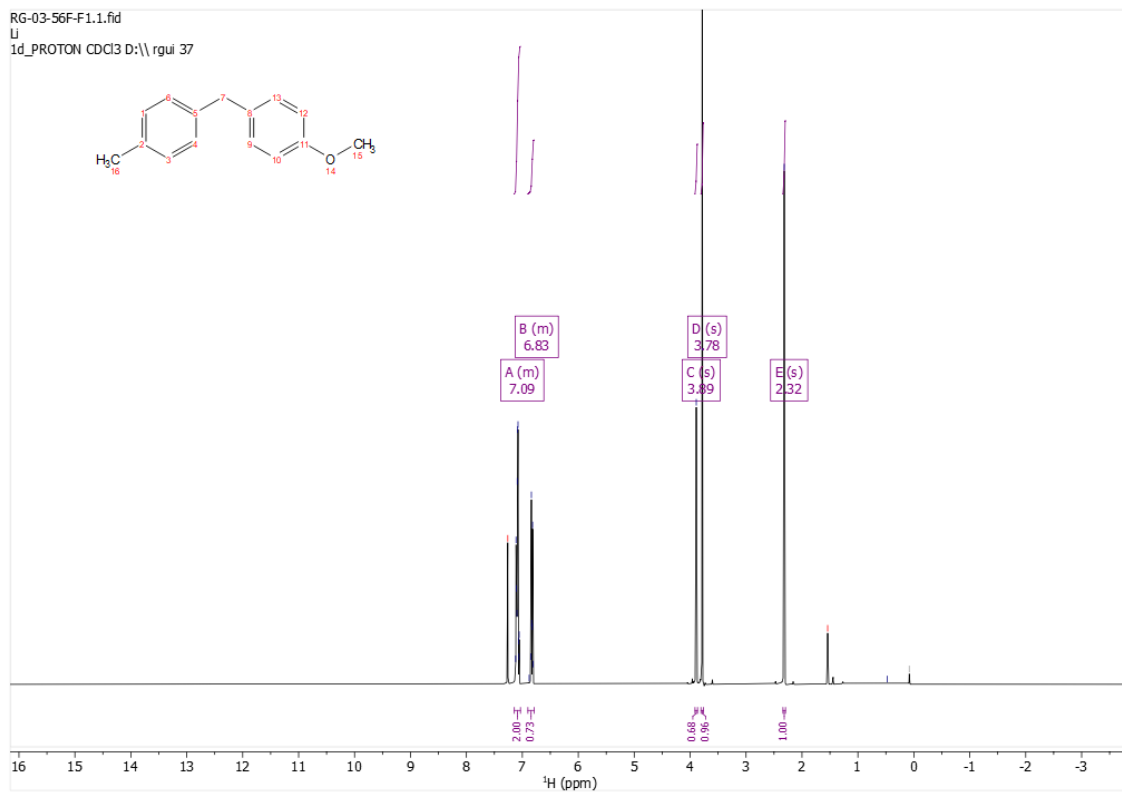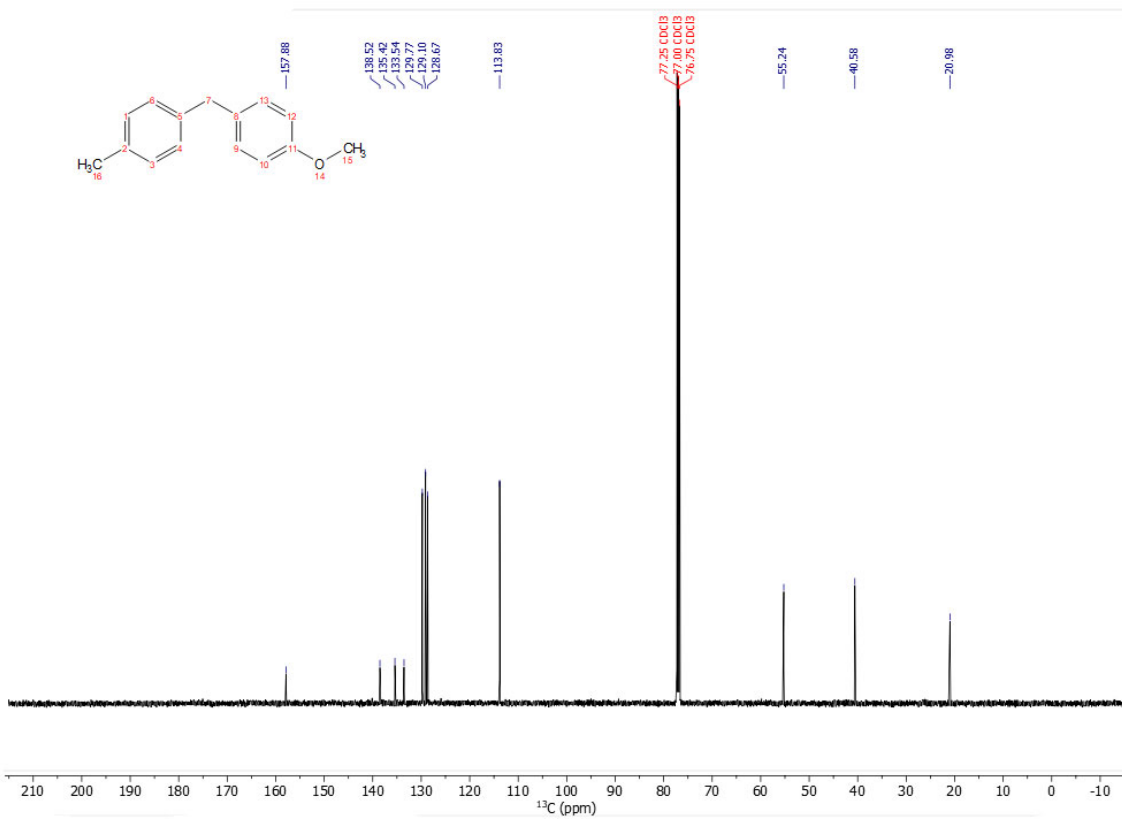



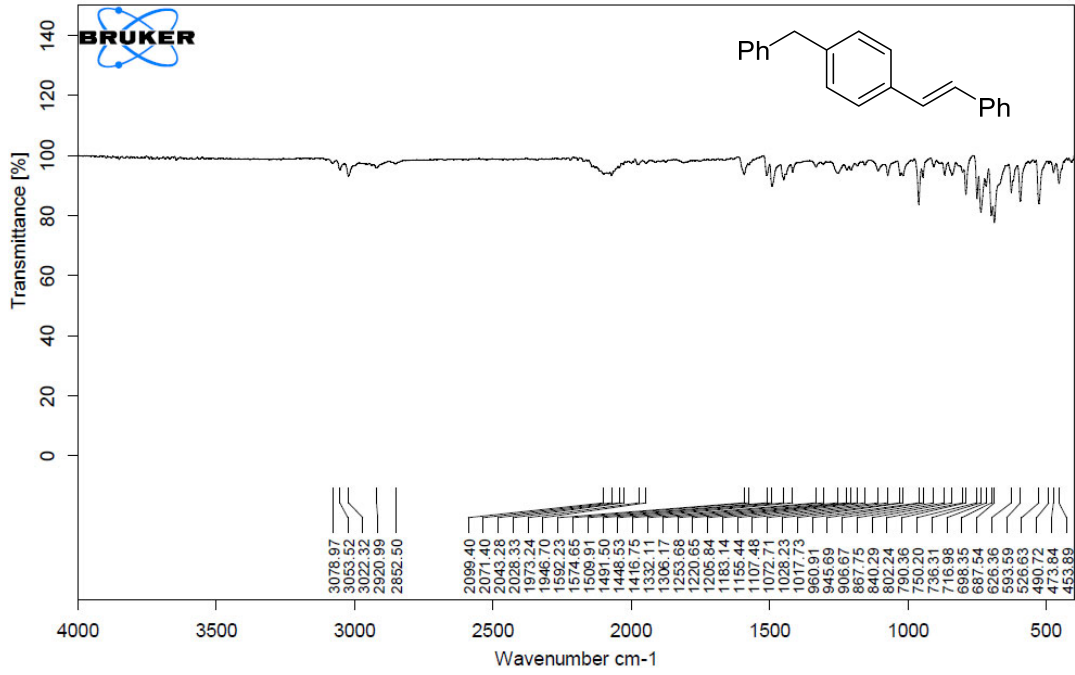

220805-05APCI- HRMS-Li-Ruohua Gui-RG-... 08/05/22 11:32:43

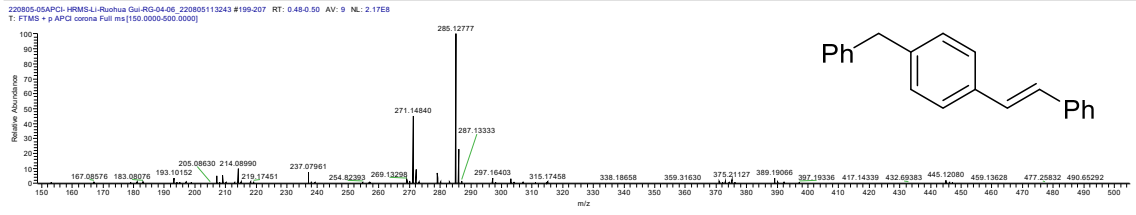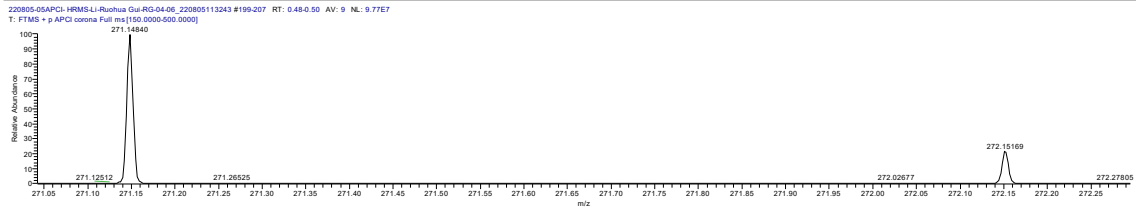

220805-05APCI- HRMS-Li-Ruohua Gui-RG-04-06\_220805113243#199-207 RT: 0.48-0.50 AV: 9

T: FTMS + p APCI corona Full ms [150.0000-500.0000]

| m/z       | Intensity  | Relative | Resolution | Charge | Theo. Mass | Delta (ppm) | RDB equiv. | Composition                     |
|-----------|------------|----------|------------|--------|------------|-------------|------------|---------------------------------|
| 271.14840 | 97683528.0 | 100.00   | 34248.36   | 1.00   | 271.14813  | 1.01        | 12.5       | C <sub>21</sub> H <sub>19</sub> |



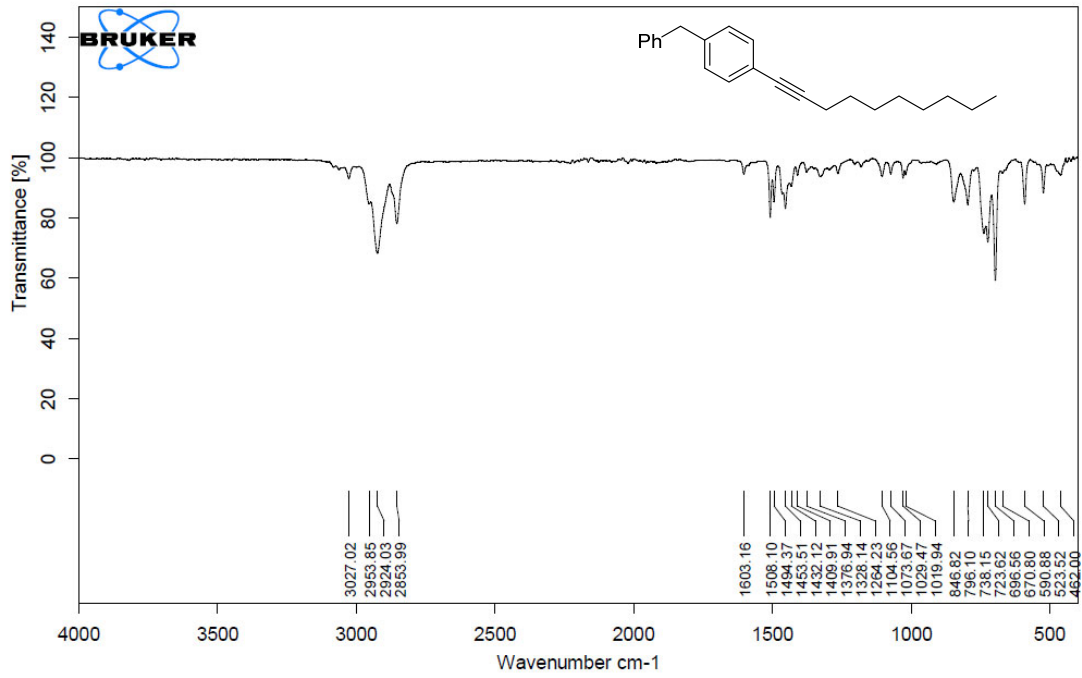

220722-05APCI-HRMS-Li-Ruhua Gui-RG-...

07/22/22 12:25:37

220722-05APCI-HRMS-Li-Ruhua Gui-RG-03-125H-F1 #492-542 RT: 1.16-1.28 AV: 51 NL: 7.06E8  
T: FTMS + p APCI corona Full ms [200.0000-500.0000]

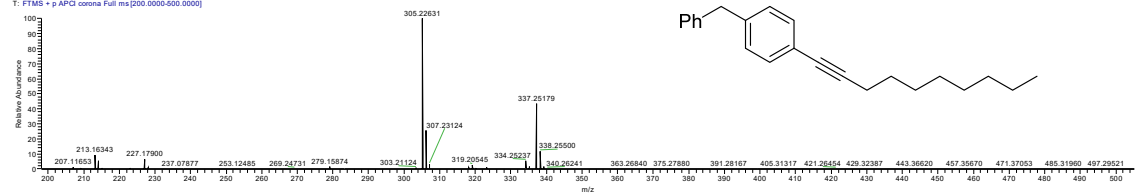

220722-05APCI-HRMS-Li-Ruhua Gui-RG-03-125H-F1 #492-542 RT: 1.16-1.28 AV: 51 NL: 7.06E8  
T: FTMS + p APCI corona Full ms [200.0000-500.0000]

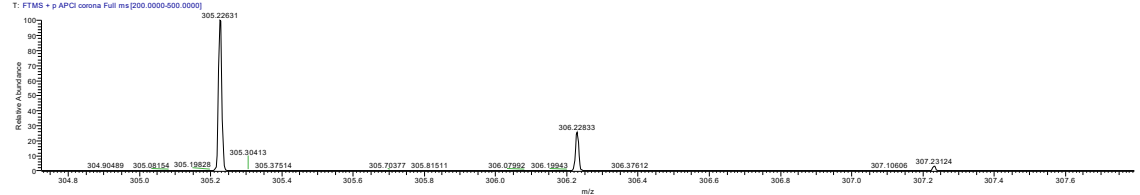

220722-05APCI-HRMS-Li-Ruhua Gui-RG-03-125H-F1 #492-542 RT: 1.16-1.28 AV: 51  
T: FTMS + p APCI corona Full ms [200.0000-500.0000]

m/z = 305.21277-305.25133

| m/z       | Intensity   | Relative | Resolution | Charge | Theo. Mass | Delta (ppm) | RDB equiv. | Composition                     |
|-----------|-------------|----------|------------|--------|------------|-------------|------------|---------------------------------|
| 305.22631 | 733372224.0 | 100.00   | 29638.38   | 1.00   | 305.22638  | -0.22       | 9.5        | C <sub>23</sub> H <sub>29</sub> |

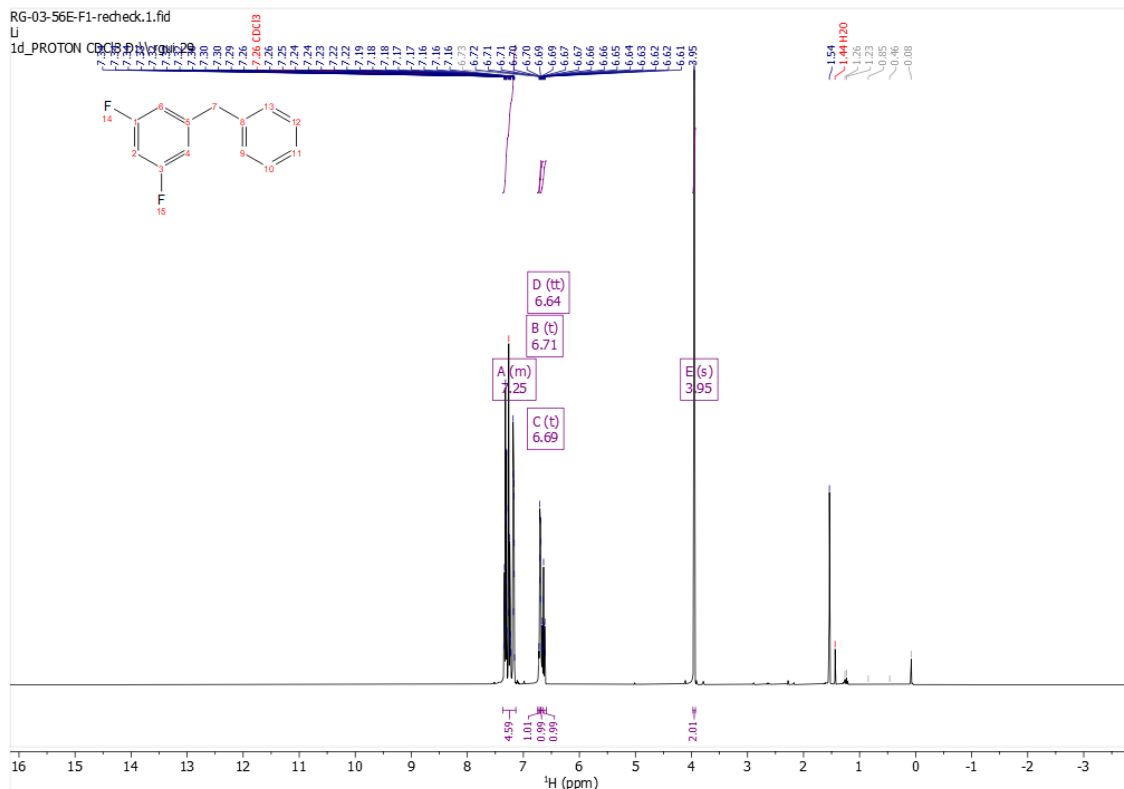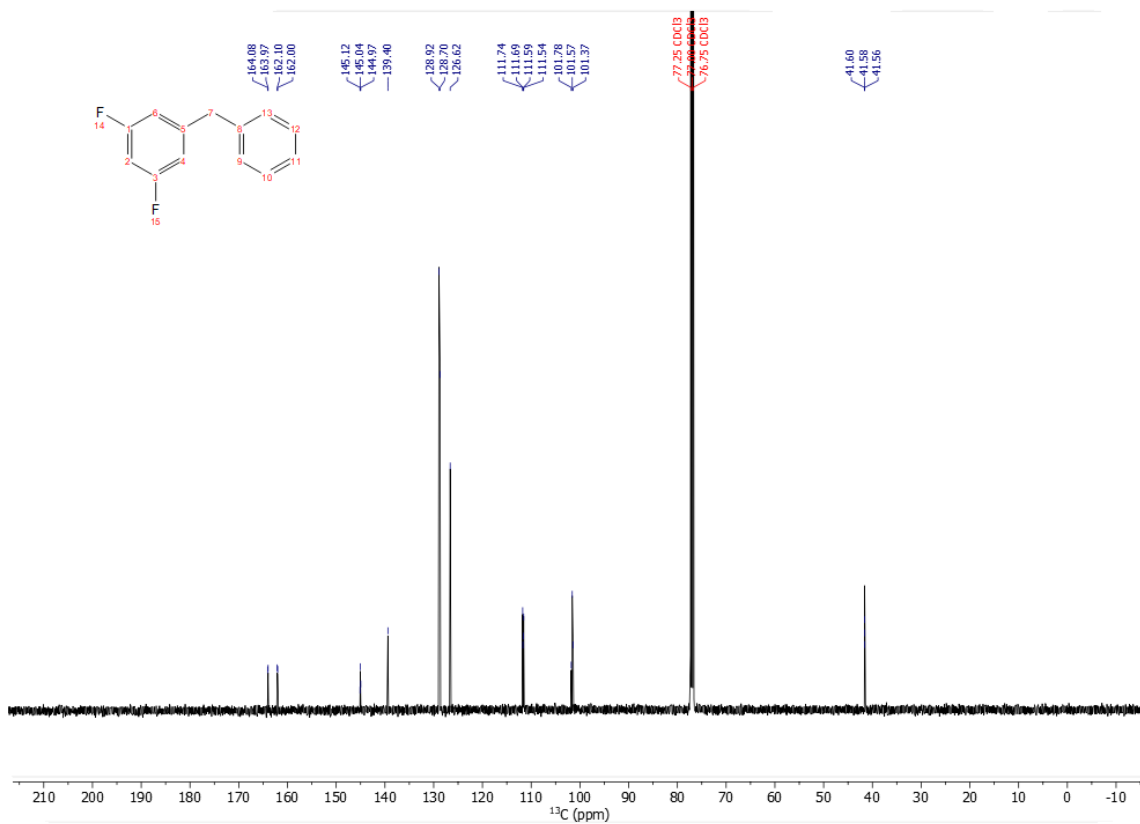

RG-03-1278-F3\_FLUORINE\_01  
RG-03-1278-F3

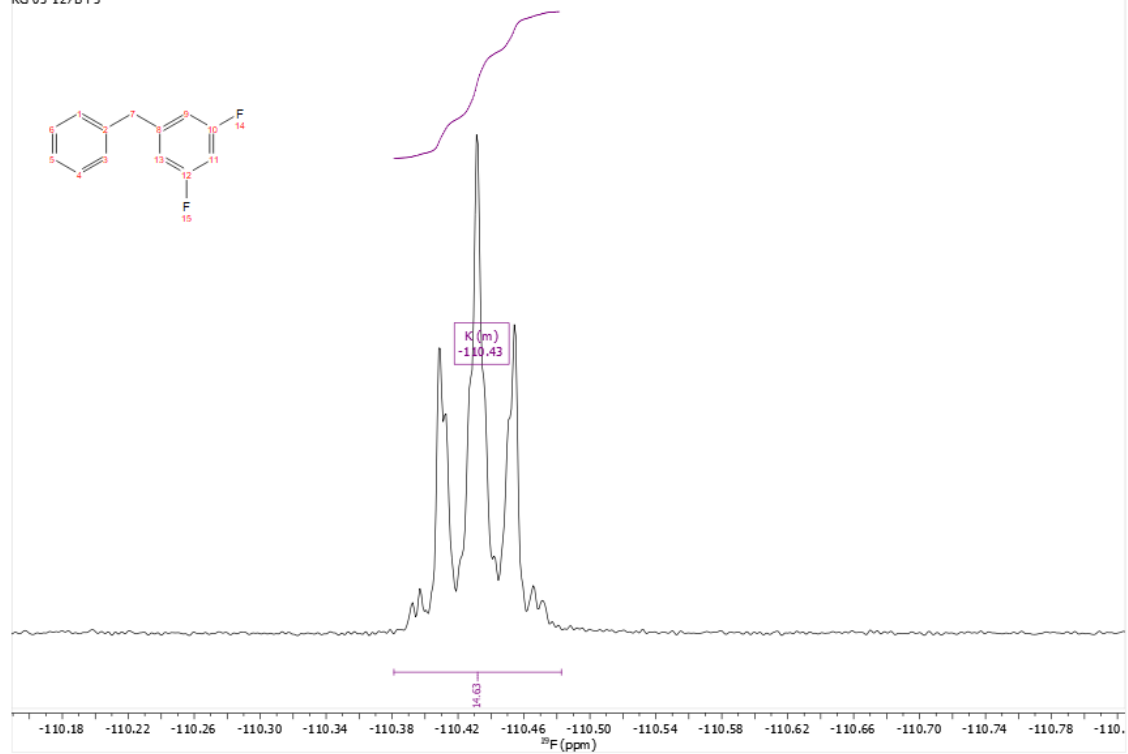

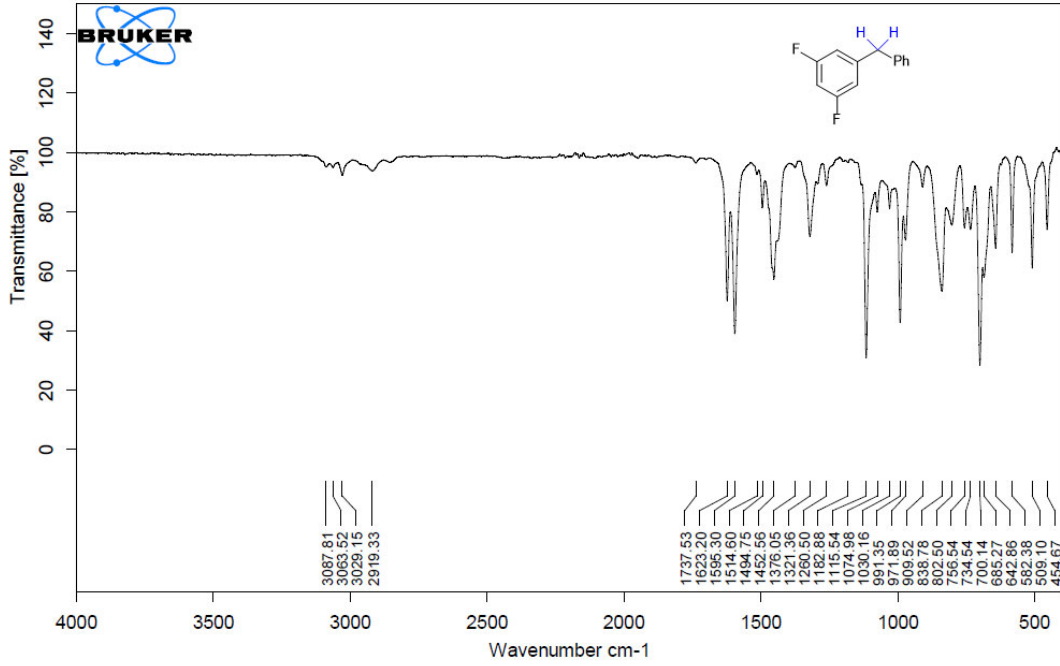

220426-03APCI HRMS-Li-Ruohua Gui-RG-0... 04/26/22 10:01:21

220426-03APCI HRMS-Li-Ruohua Gui-RG-03-56E #395-402 RT: 0.97-0.98 AV: 8 SB: 28 0.03-0.09 NL: 3.43E6  
T: FTMS - p APCI corona Full ms [150.0000-500.0000]

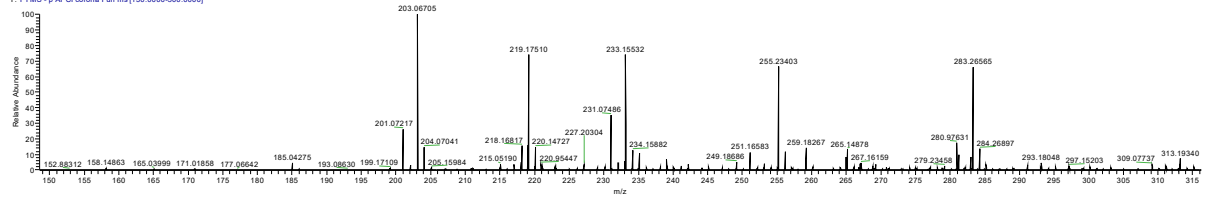

220426-03APCI HRMS-Li-Ruohua Gui-RG-03-56E #395-402 RT: 0.97-0.98 AV: 8 SB: 28 0.03-0.09 NL: 3.43E6  
T: FTMS - p APCI corona Full ms [150.0000-500.0000]

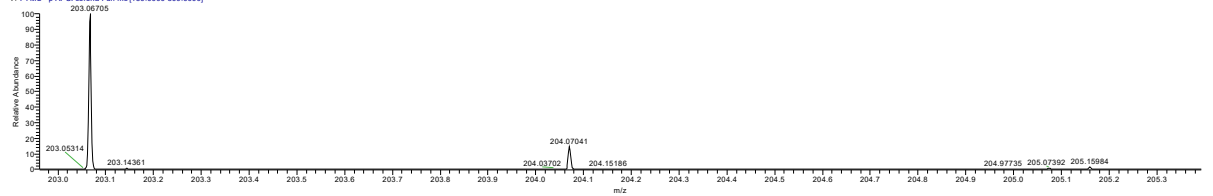

220426-03APCI HRMS-Li-Ruohua Gui-RG-03-56E #395-402 RT: 0.97-0.98 AV: 8

SB: 28 0.03-0.09

T: FTMS - p APCI corona Full ms [150.0000-500.0000]

m/z = 203.05635-203.07357

| m/z       | Intensity | Relative | Resolution | Charge | Theo. Mass | Delta (ppm) | RDB equiv. | Composition                                   |
|-----------|-----------|----------|------------|--------|------------|-------------|------------|-----------------------------------------------|
| 203.06705 | 3481768.8 | 100.00   | 35440.10   | 1.00   | 203.06778  | -3.60       | 8.5        | C <sub>13</sub> H <sub>9</sub> F <sub>2</sub> |



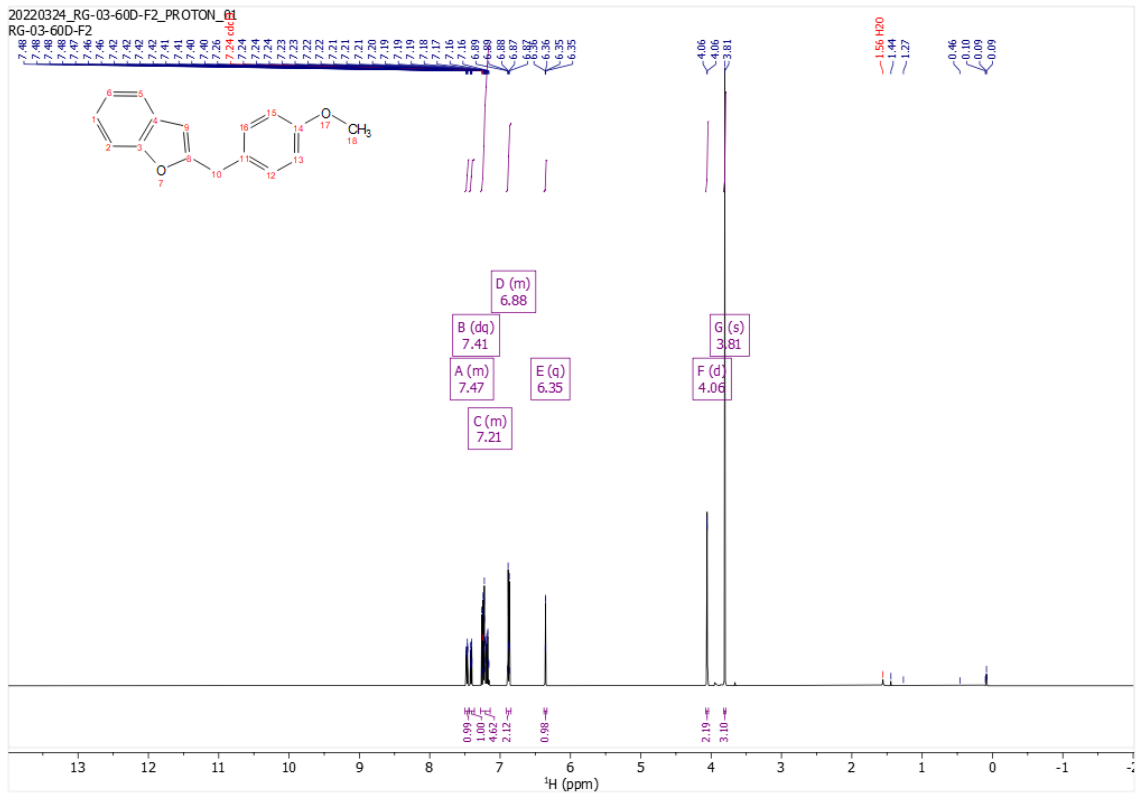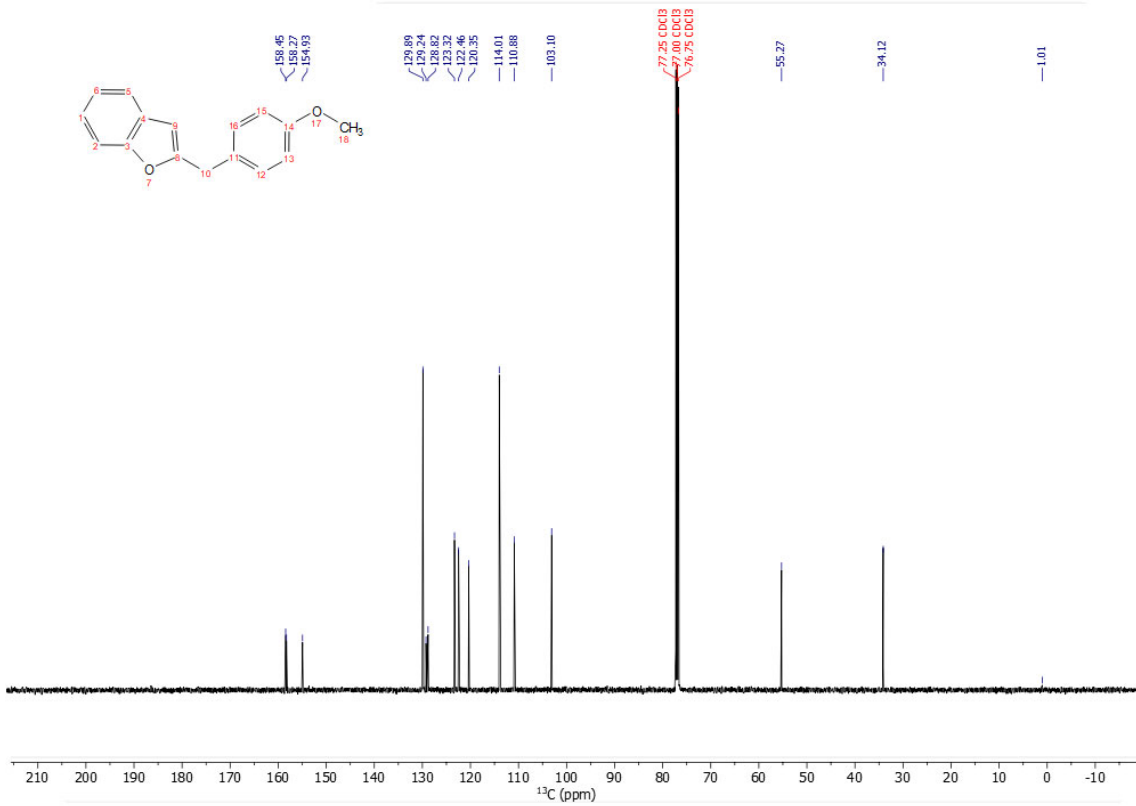

220427-04ESI HRMS-Li-Ruohua Gui-RG-03-73B #768-778 RT: 5.374-3.39 AV: 11 NL: 1.146E  
T: FTMS + p ESI Full ms [150.0000-500.0000]

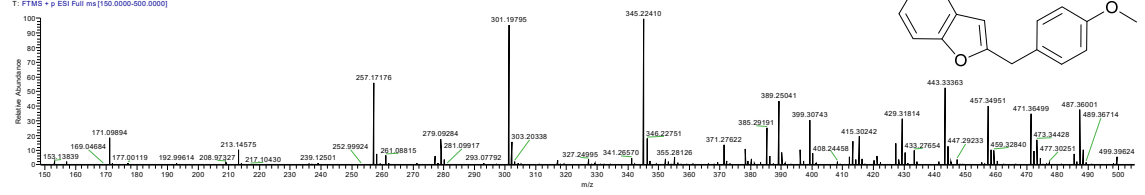

220427-04ESI HRMS-Li-Ruohua Gui-RG-03-73B #768-778 RT: 5.374-3.39 AV: 11 NL: 7.246E  
T: FTMS + p ESI Full ms [150.0000-500.0000]

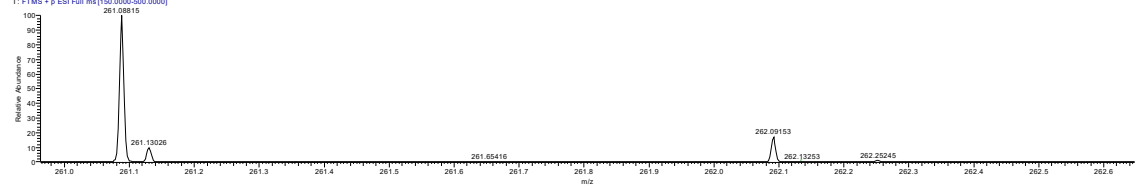

220427-04ESI HRMS-Li-Ruohua Gui-RG-03-73B #768-778 RT: 5.37-5.39 AV: 11  
T: FTMS + p ESI Full ms [150.0000-500.0000]

m/z = 261.08186-261.09564

| m/z       | Intensity | Relative | Resolution | Charge | Theo. Mass | Delta (ppm) | RDB equiv. | Composition                                       |
|-----------|-----------|----------|------------|--------|------------|-------------|------------|---------------------------------------------------|
| 261.08815 | 7278741.5 | 100.00   | 34251.95   | 1.00   | 261.08860  | -1.72       | 9.5        | C <sub>16</sub> H <sub>14</sub> O <sub>2</sub> Na |

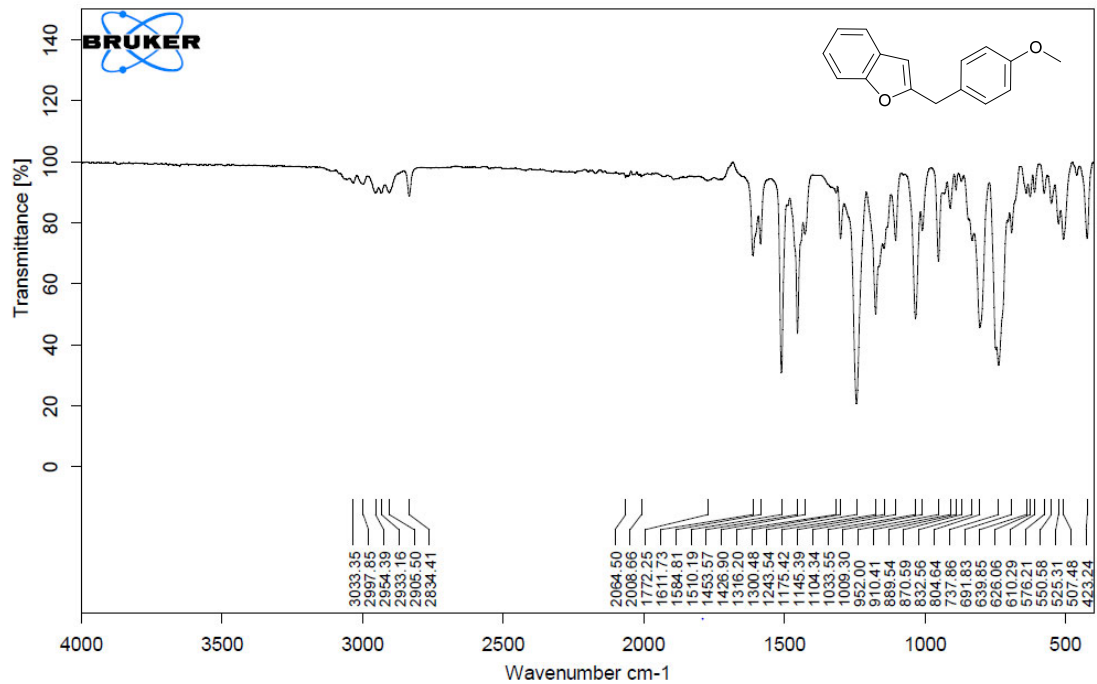



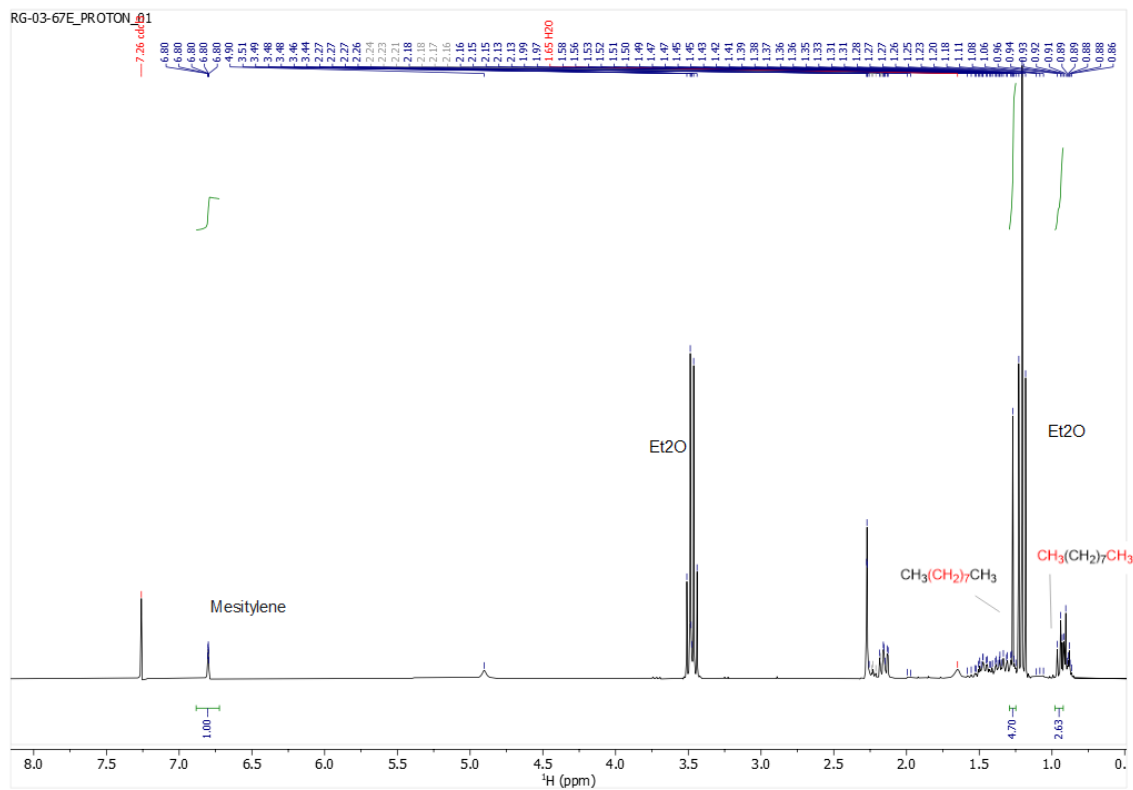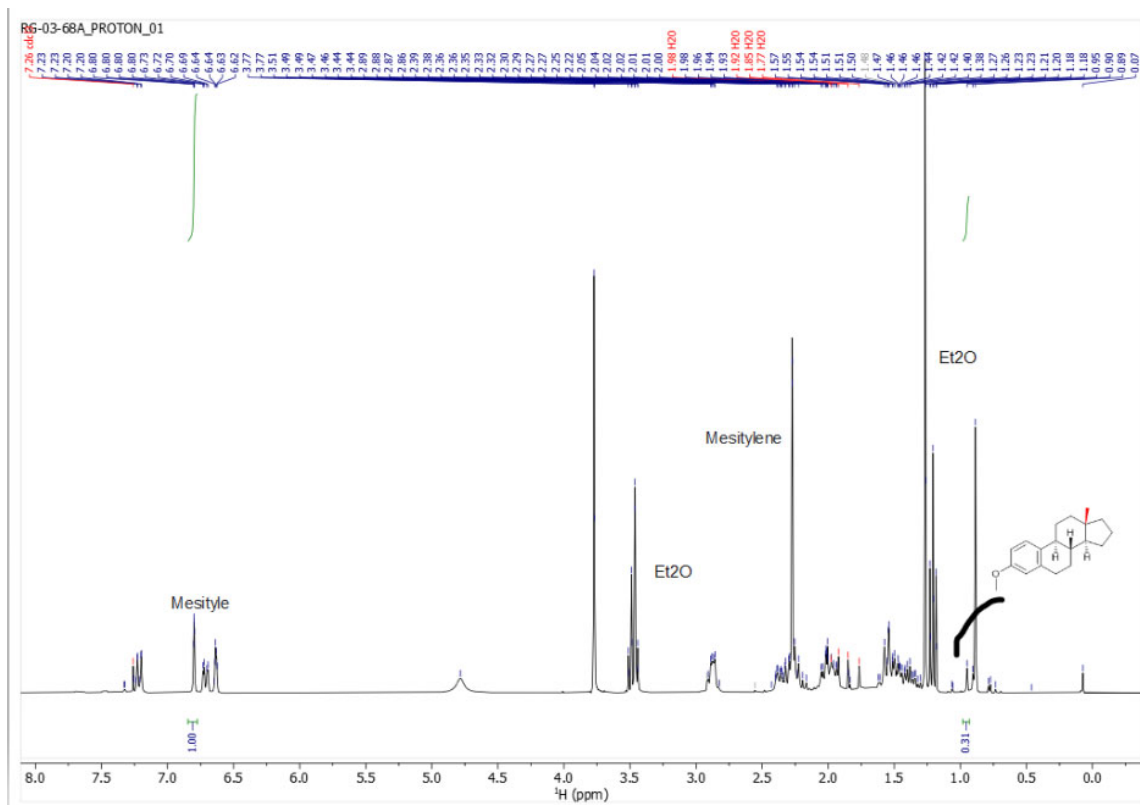

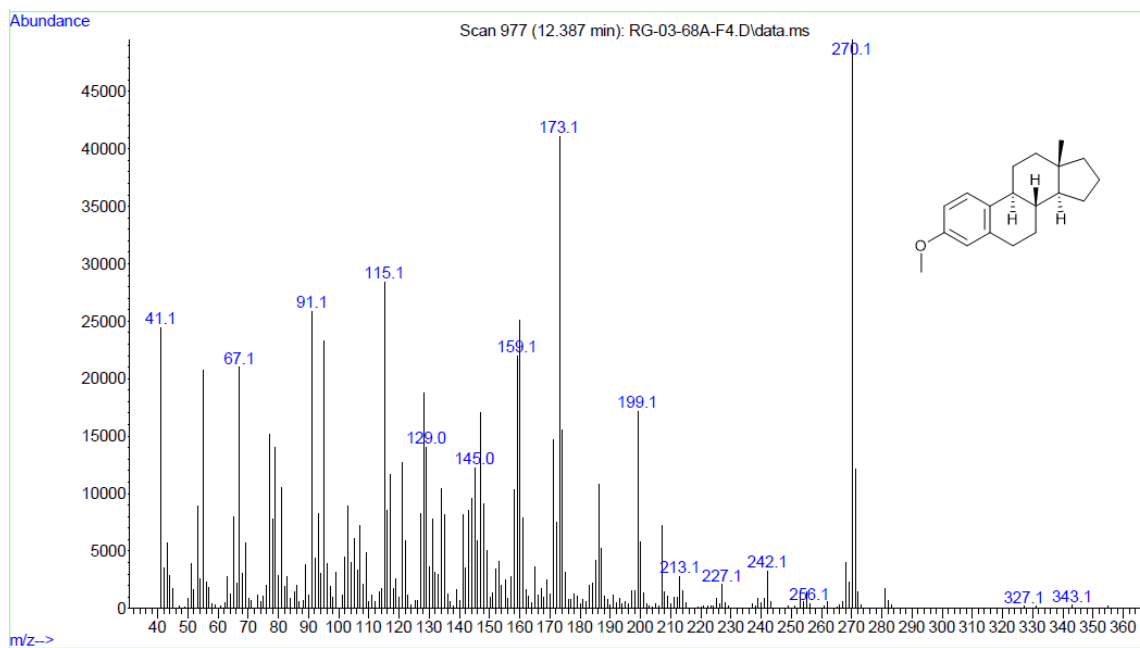

RG-03-568F1-dry.1.fid  
 U  
 Id\_PROTON CDCl3 D:\\ rgui 10

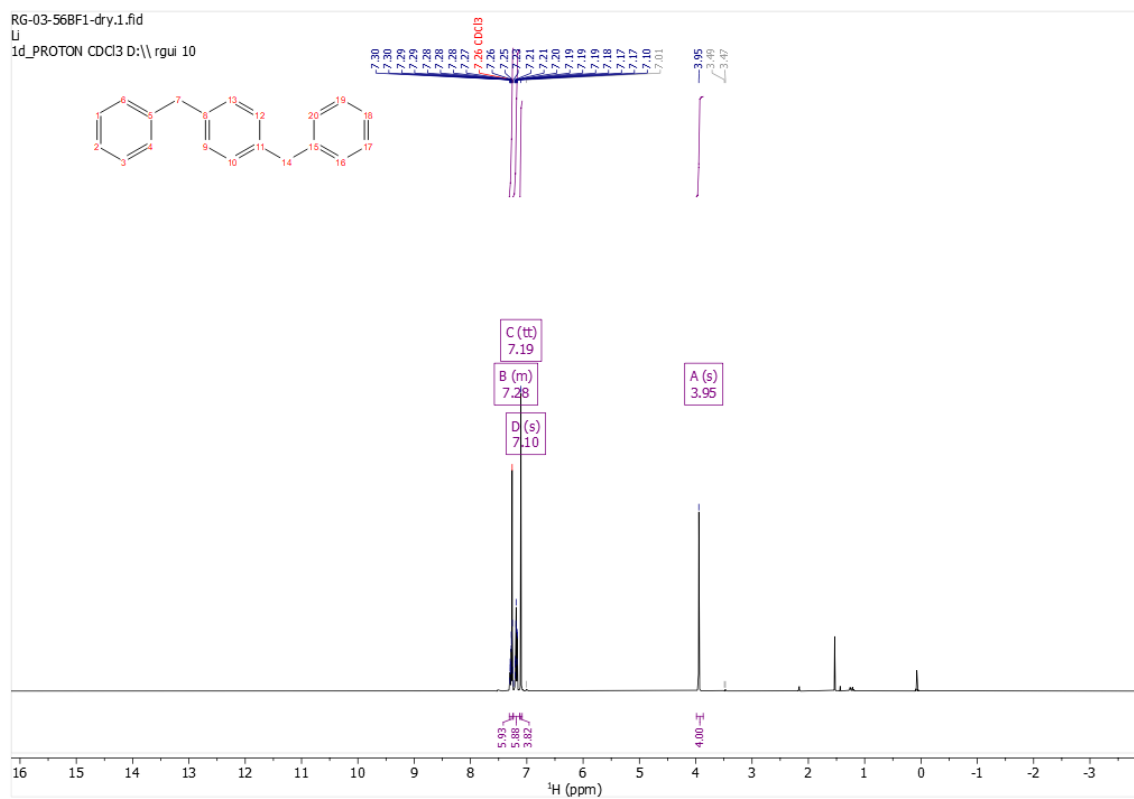

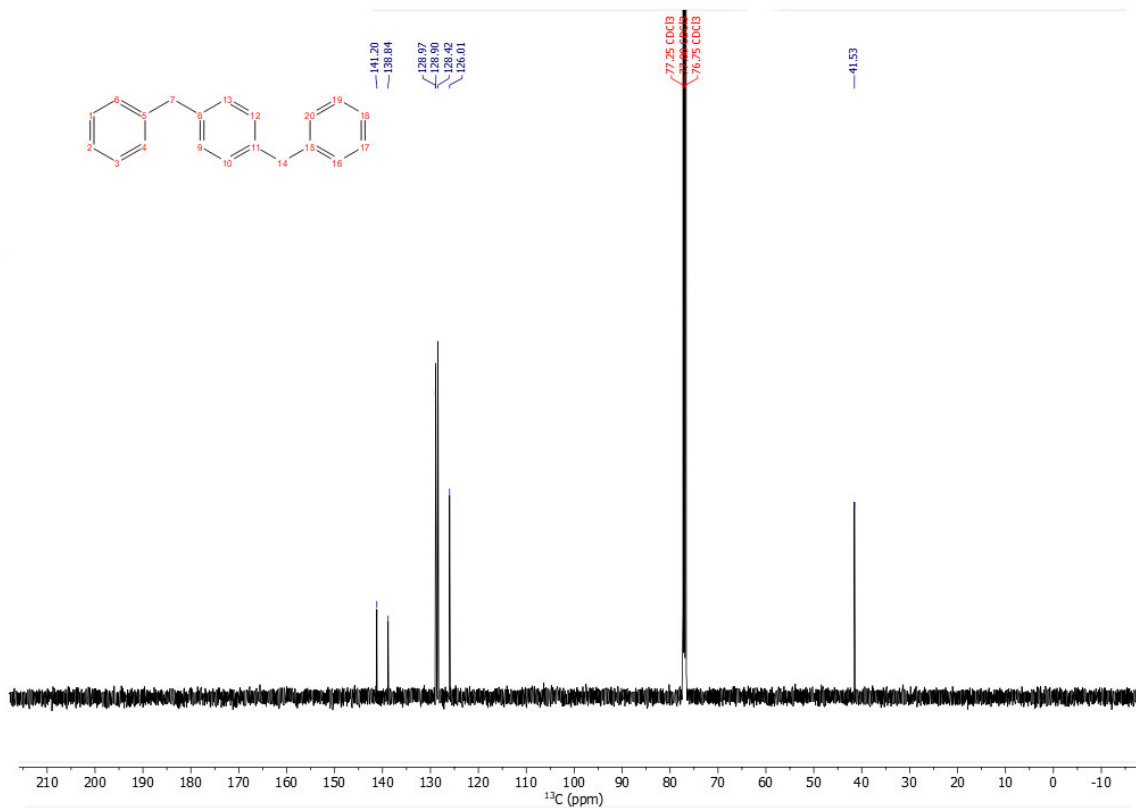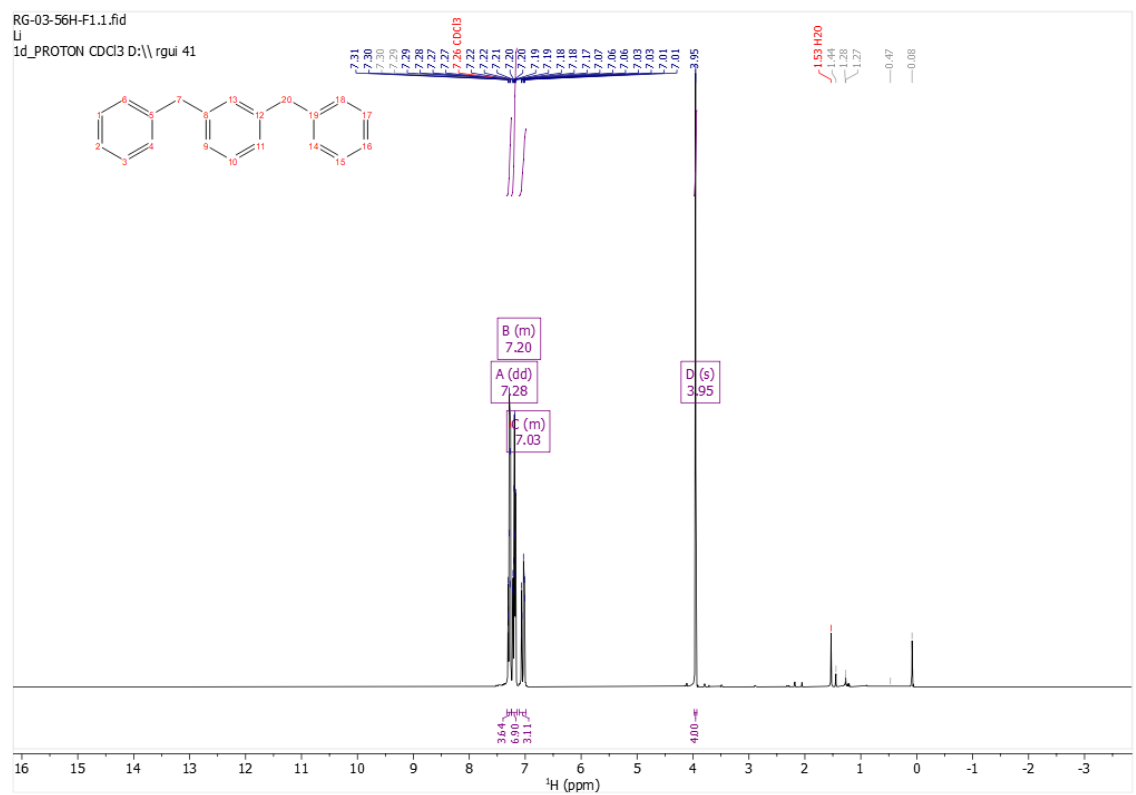

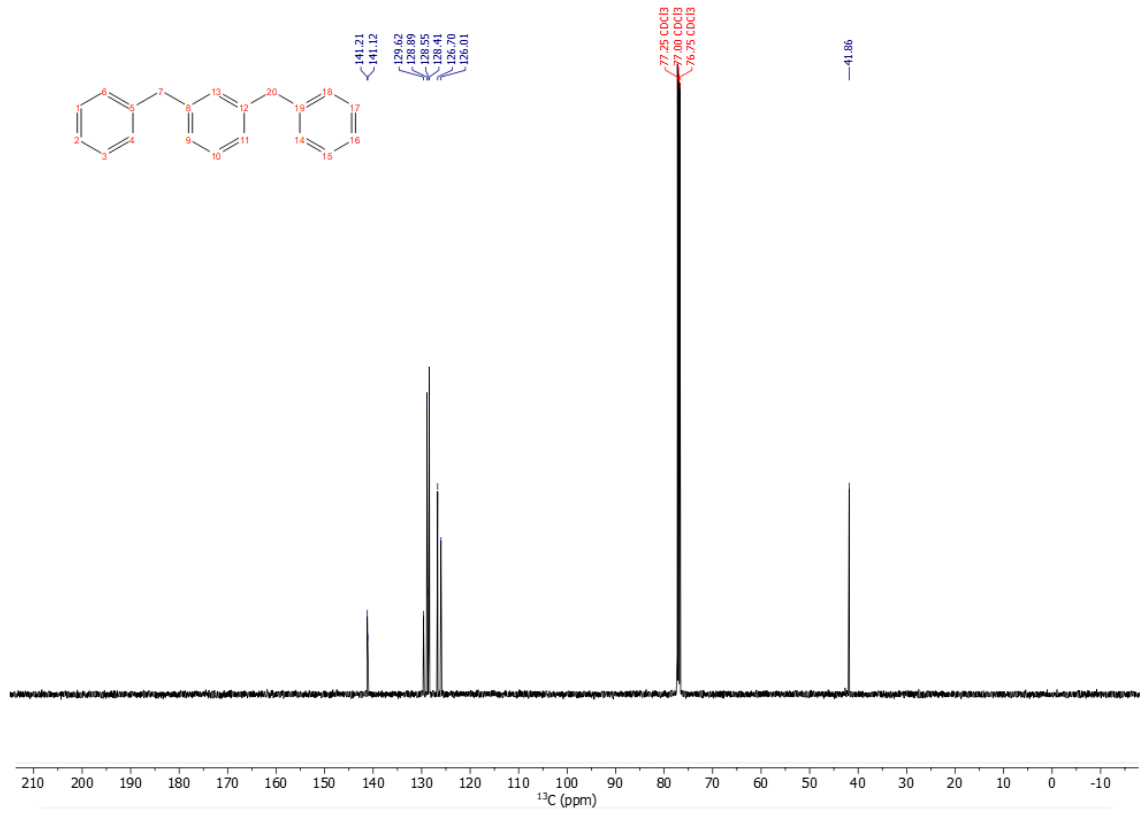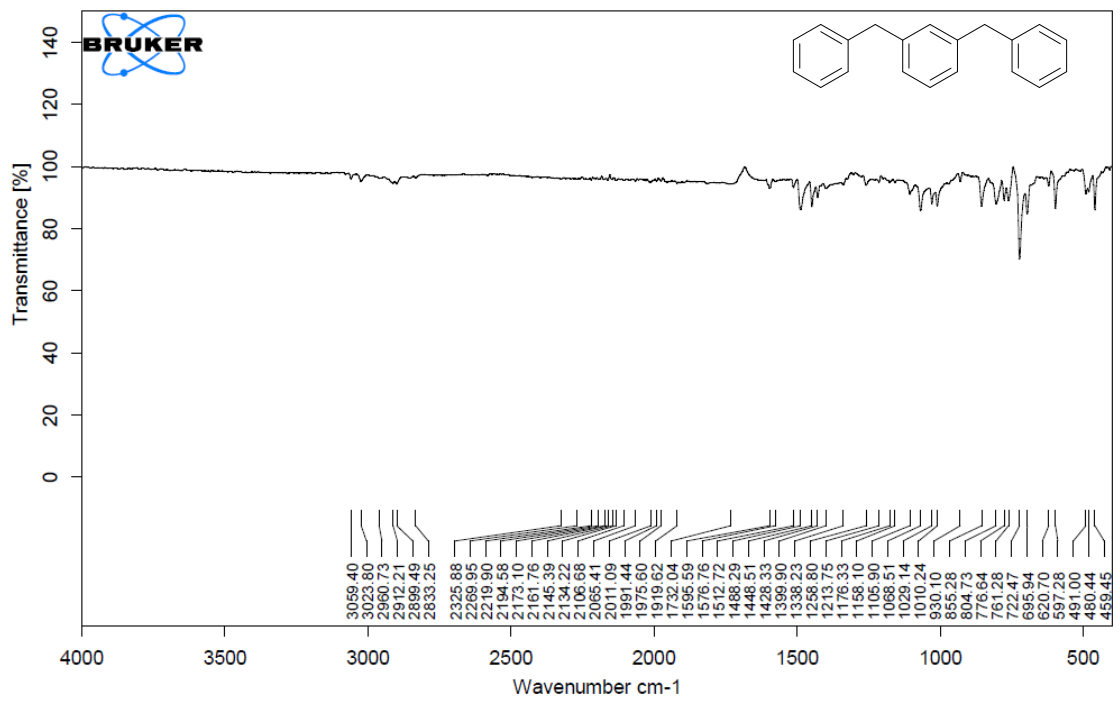

220426-04APCI HRMS-Li-Ruohua Gui-RG-03-56H#176-184 RT: 0.41-0.43 AV: 9 NL: 1.1629  
T: FTMS + p APCI corona Full ms [150.0000-500.0000]

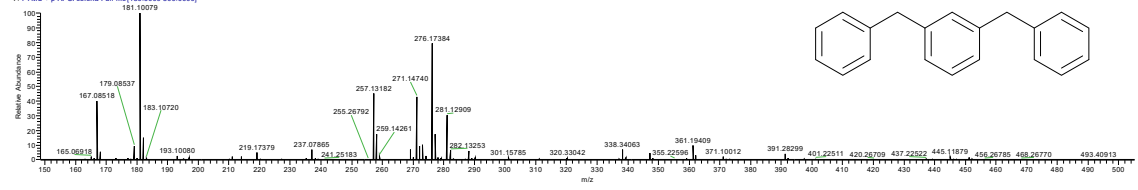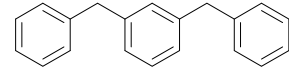

220426-04APCI HRMS-Li-Ruohua Gui-RG-03-56H#176-184 RT: 0.41-0.43 AV: 9

T: FTMS + p APCI corona Full ms [150.0000-500.0000]

m/z= 281.11114-281.13894

| m/z       | Intensity   | Relative Resolution | Charge   | Theo. Mass | Delta (ppm) | RDB equiv. | Composition                                                        |
|-----------|-------------|---------------------|----------|------------|-------------|------------|--------------------------------------------------------------------|
| 281.12909 | 359434112.0 | 100.00              | 31789.59 | 1.00       | 281.12845   | 2.27       | 10.5 C <sub>17</sub> H <sub>17</sub> O <sub>2</sub> N <sub>2</sub> |
|           |             |                     |          |            | 281.13007   | -3.49      | 11.5 C <sub>20</sub> H <sub>18</sub> Na                            |

220426-04APCI HRMS-Li-Ruohua Gui-RG-03-56H#176-184 RT: 0.41-0.43 AV: 9

T: FTMS + p APCI corona Full ms [150.0000-500.0000]

m/z= 257.12449-257.13669

| m/z       | Intensity   | Relative Resolution | Charge   | Theo. Mass | Delta (ppm) | RDB equiv. | Composition                          |
|-----------|-------------|---------------------|----------|------------|-------------|------------|--------------------------------------|
| 257.13182 | 540994112.0 | 100.00              | 32786.08 | 1.00       | 257.13248   | -2.57      | 12.5 C <sub>20</sub> H <sub>17</sub> |

RG-03-60A-F1\_PROTON\_01

RG-03-60A-F1

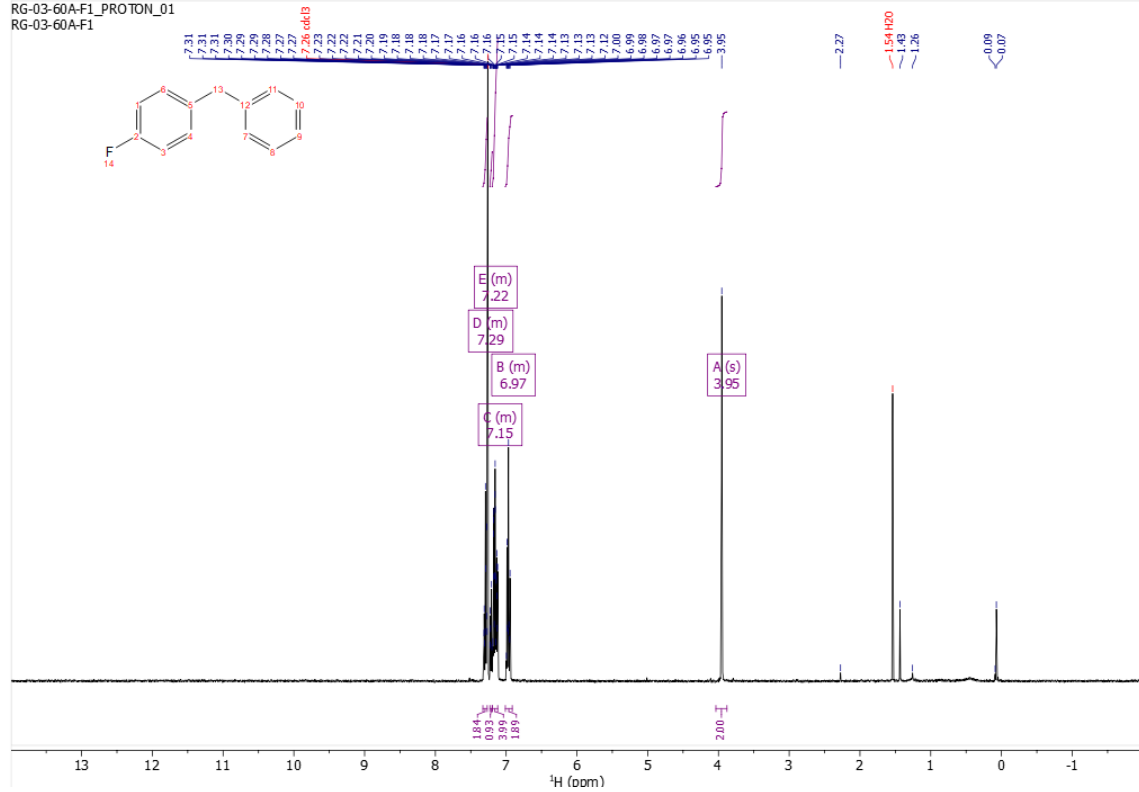



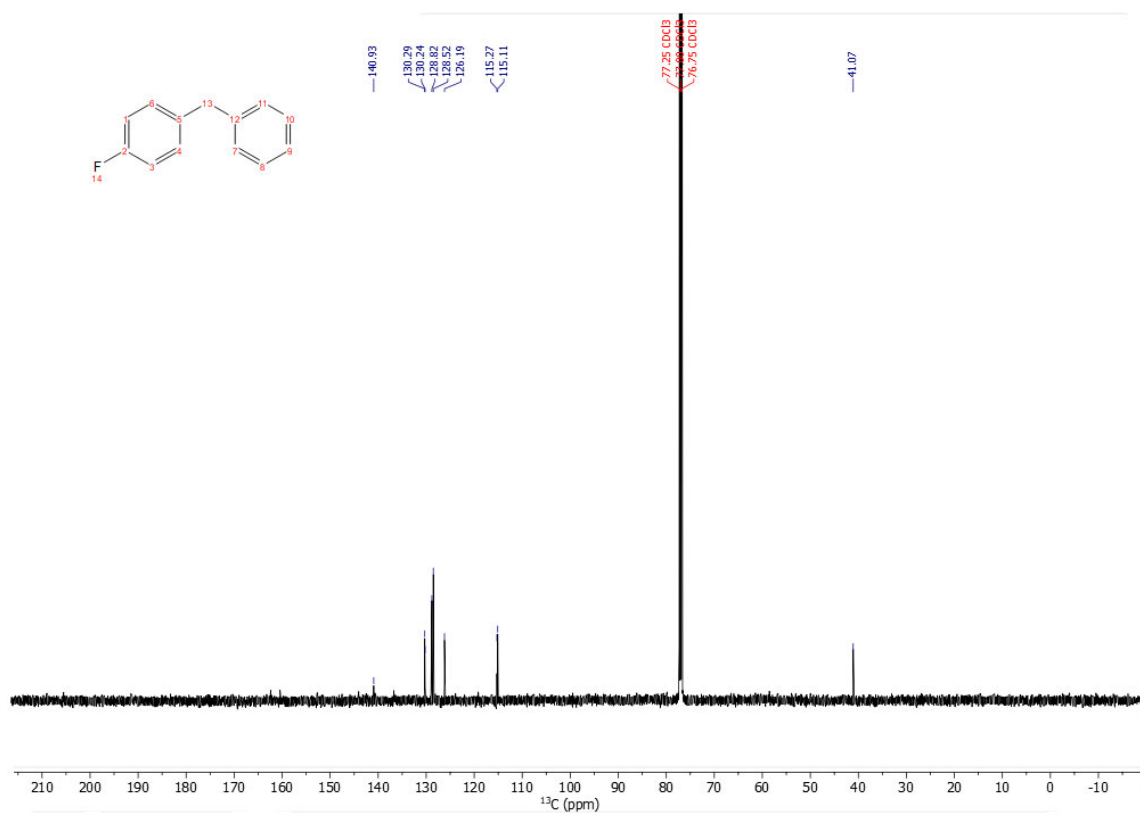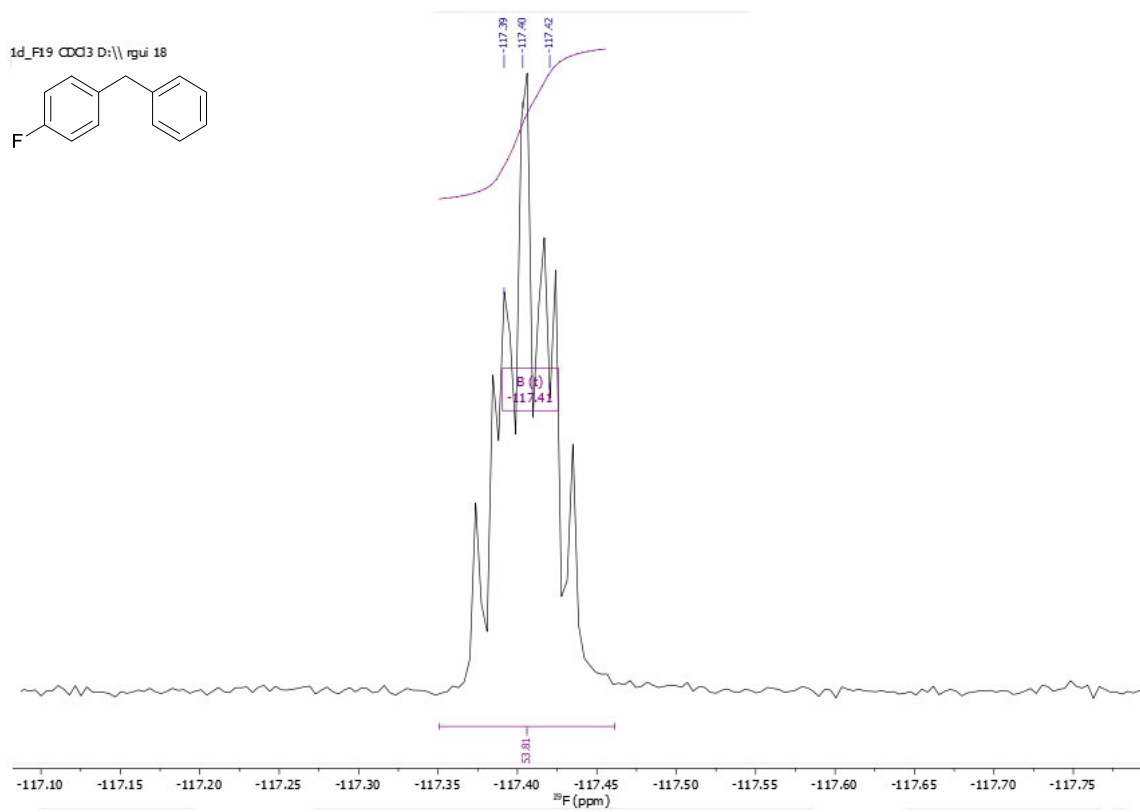

20220321\_RG-03-57C-F1\_PROTON\_01  
RG-03-57C-F1

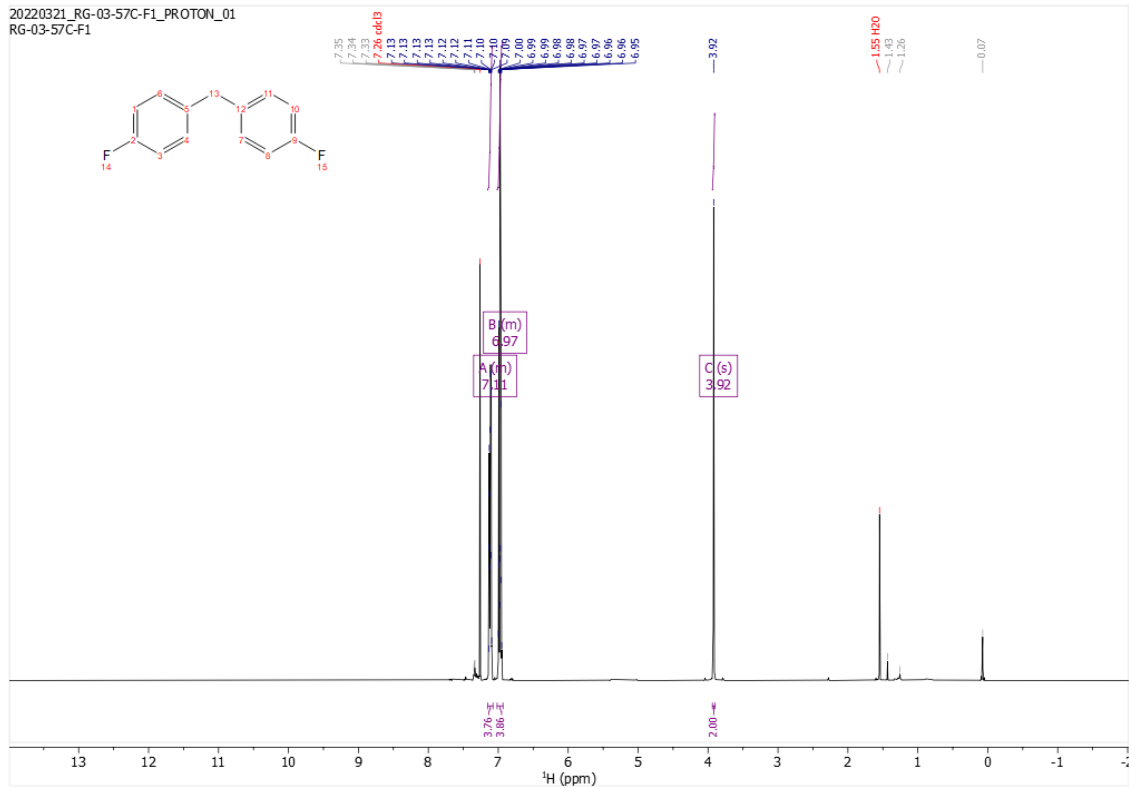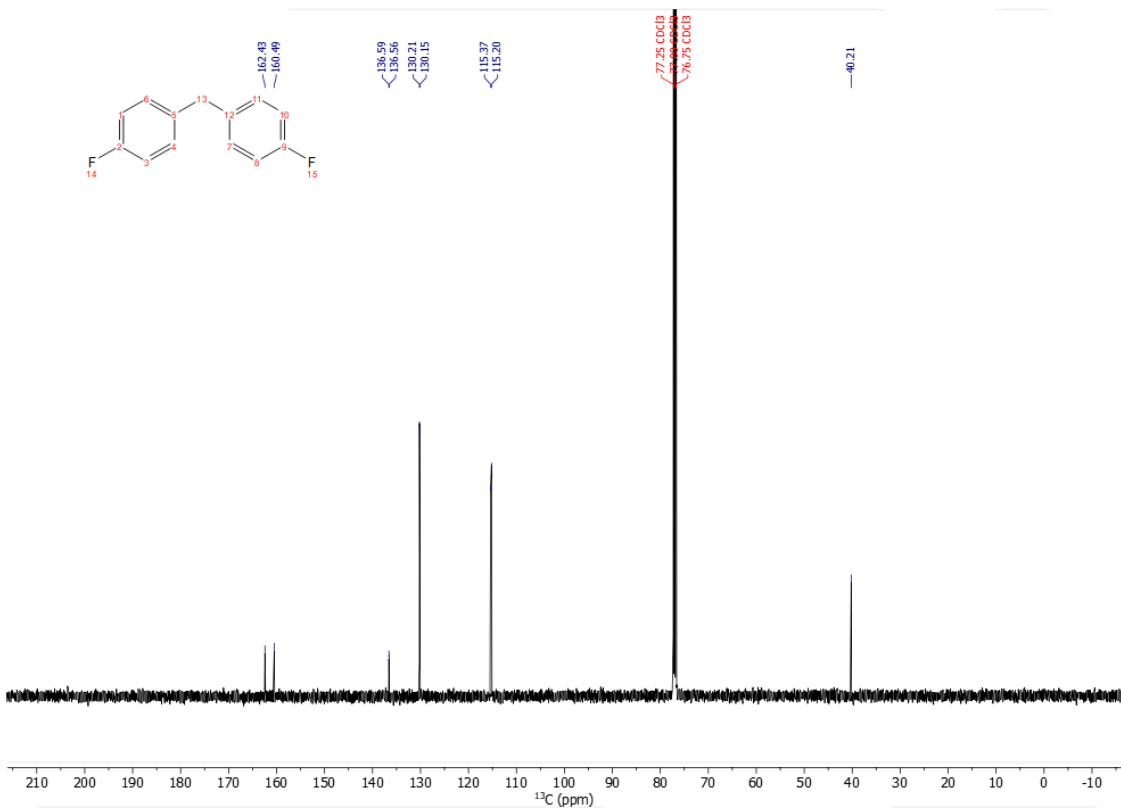

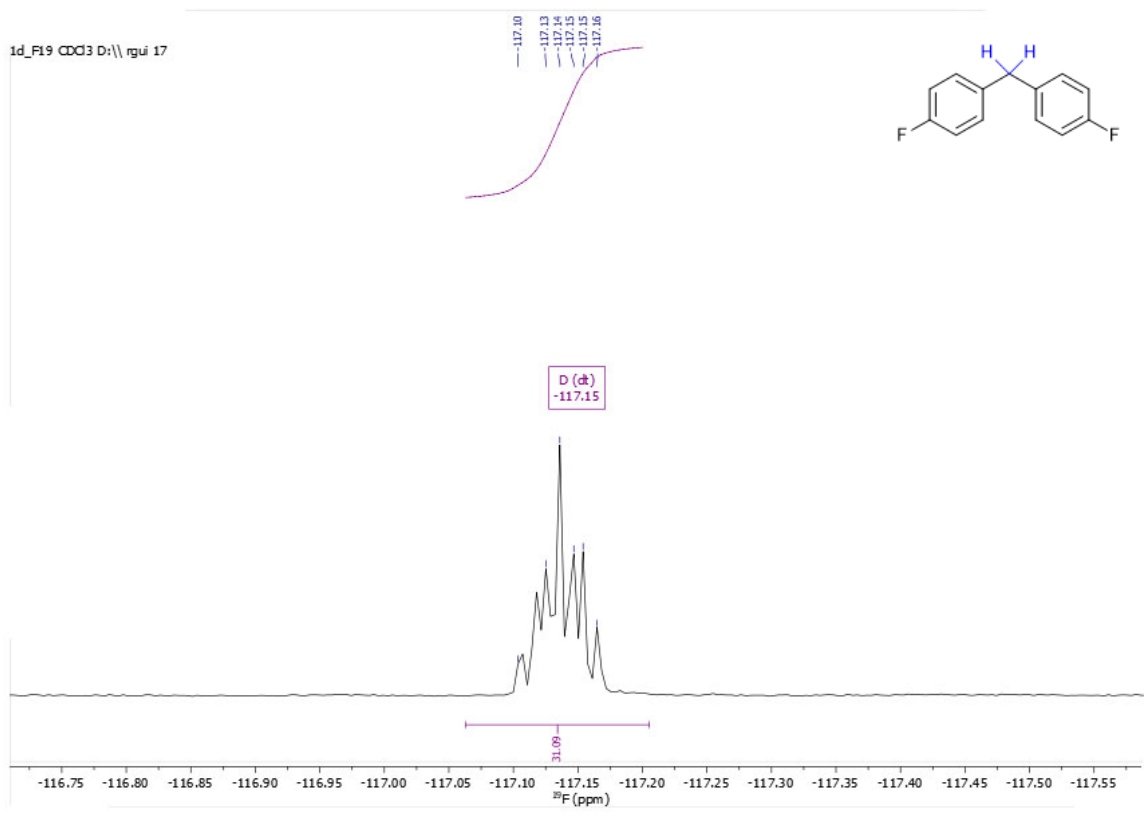

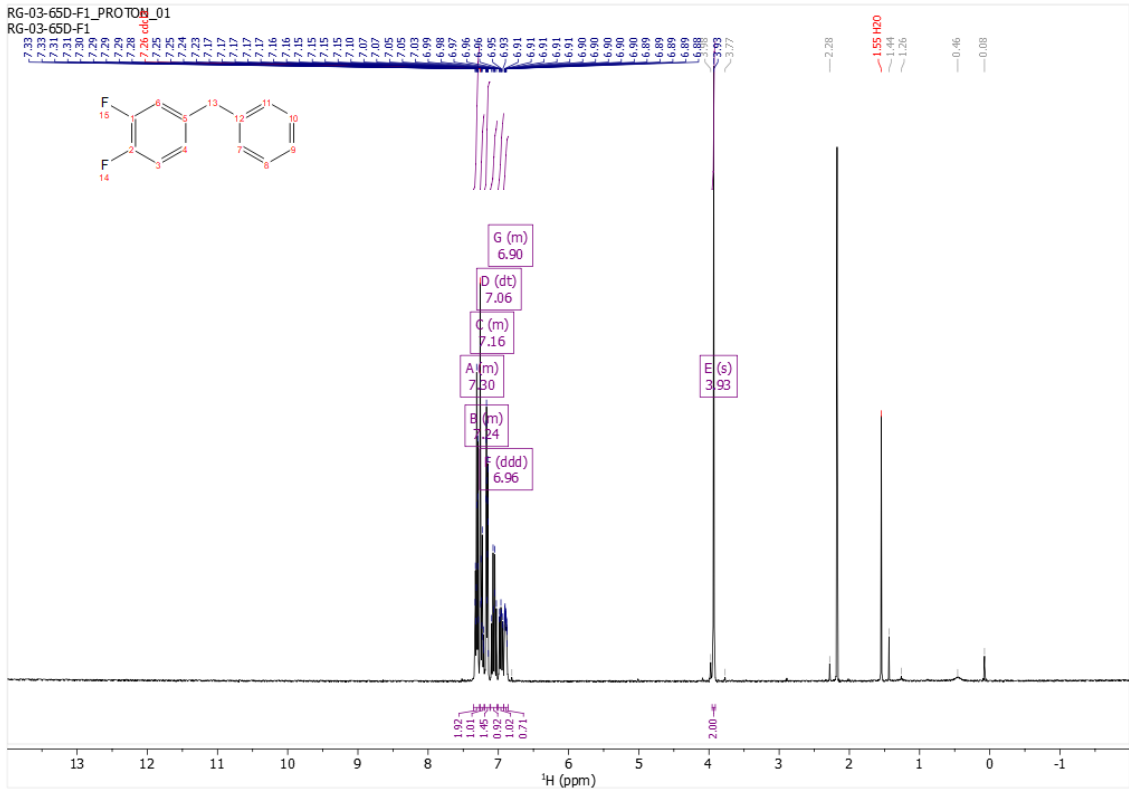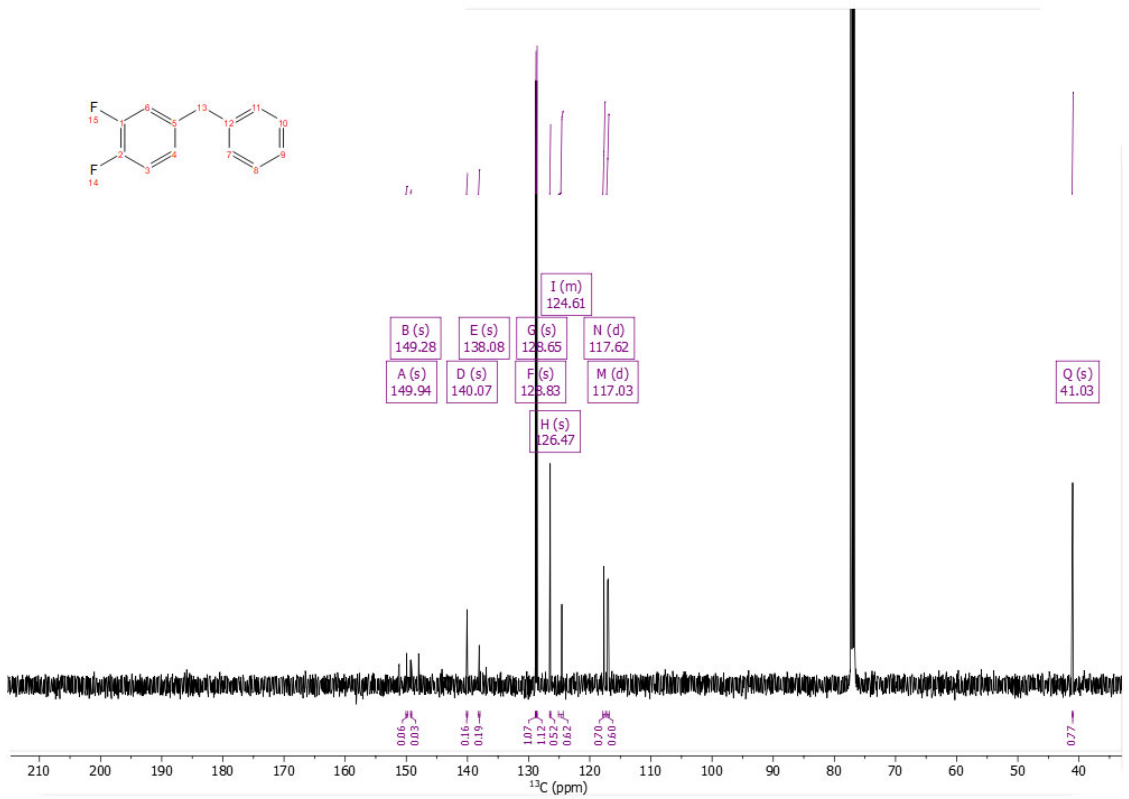

RG-03-125G-F3\_FLUORINE\_01  
RG-03-125G-F3

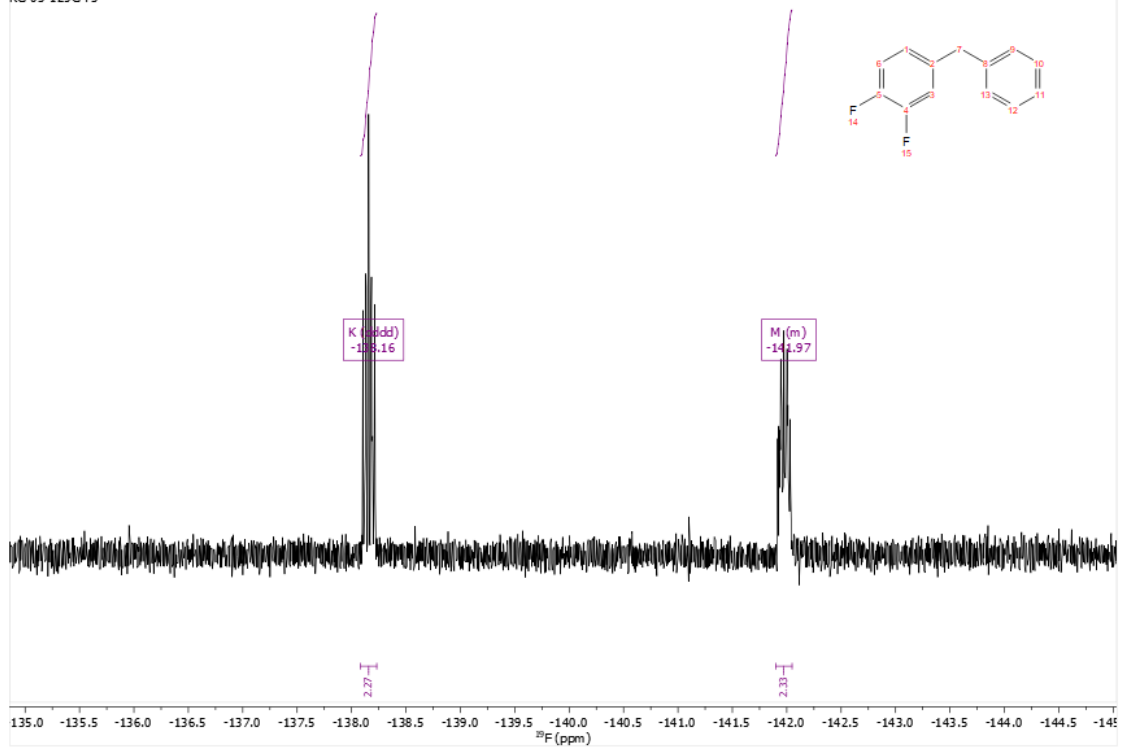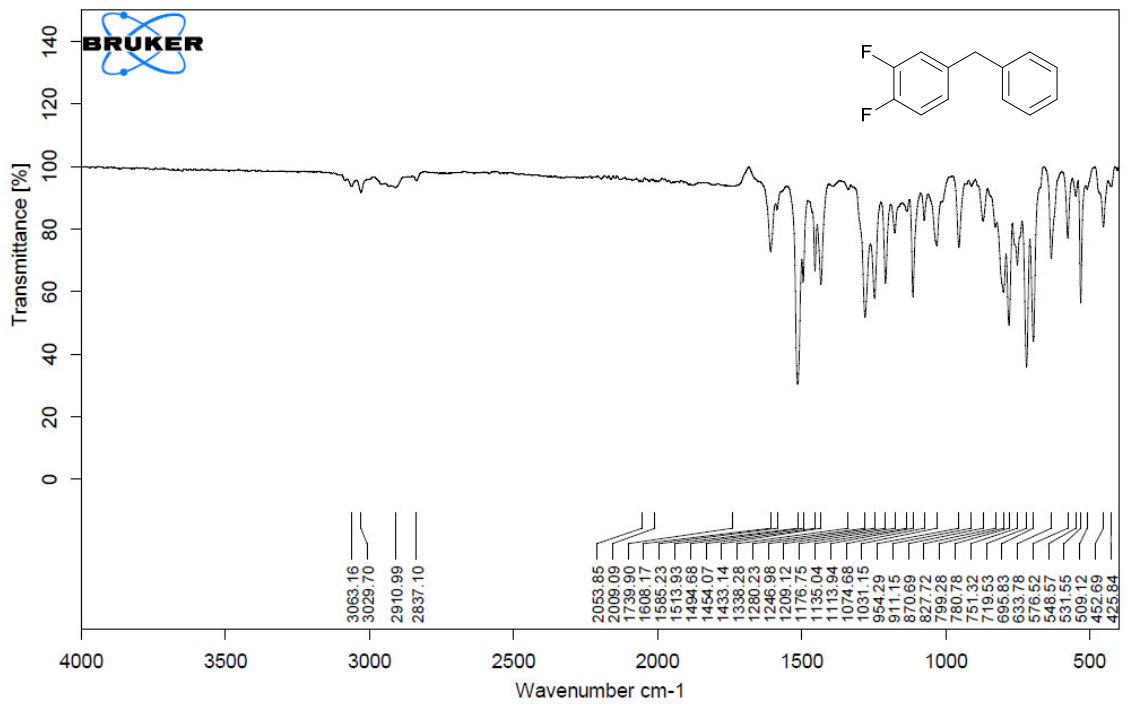

220426-02APCI HRMS-Li-Ruohua Gui-RG-03-65D#887-818 RT: 3.81-3.87 AV: 25 NL: 1.31E7  
T: FTMS - p APCI corona Full ms [150.0000-500.0000]

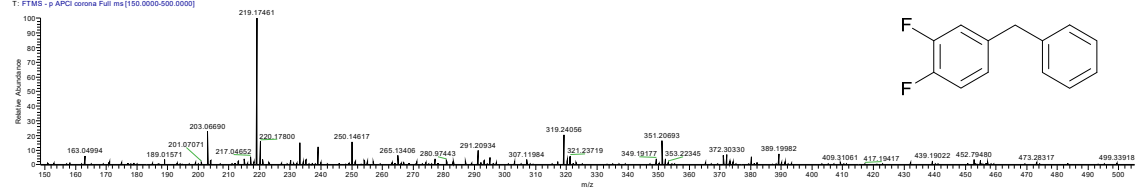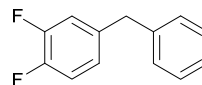

220426-02APCI HRMS-Li-Ruohua Gui-RG-03-65D#794-818 RT: 3.81-3.87 AV: 25 NL: 2.99E6  
T: FTMS - p APCI corona Full ms [150.0000-500.0000]

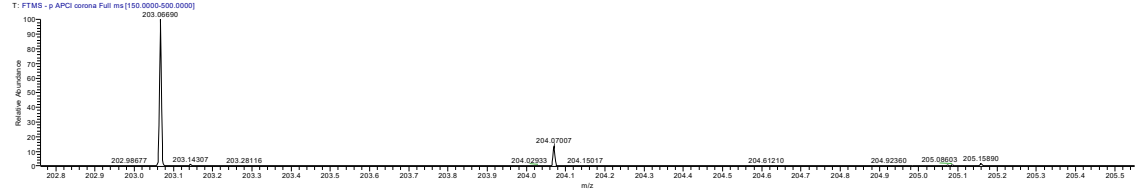

220426-02APCI HRMS-Li-Ruohua Gui-RG-03-65D#794-818 RT: 3.81-3.87 AV: 25

T: FTMS - p APCI corona Full ms [150.0000-500.0000]

m/z = 203.06677-203.07653

| m/z       | Intensity | Relative | Resolution | Charge | Theo. Mass | Delta (ppm) | RDB equiv. | Composition                                   |
|-----------|-----------|----------|------------|--------|------------|-------------|------------|-----------------------------------------------|
| 203.06690 | 3029890.3 | 100.00   | 37057.96   | 1.00   | 203.06778  | -4.36       | 8.5        | C <sub>13</sub> H <sub>9</sub> F <sub>2</sub> |

20220321\_RG-03-57B-F1\_PROTON\_01  
RG-03-57B-F1

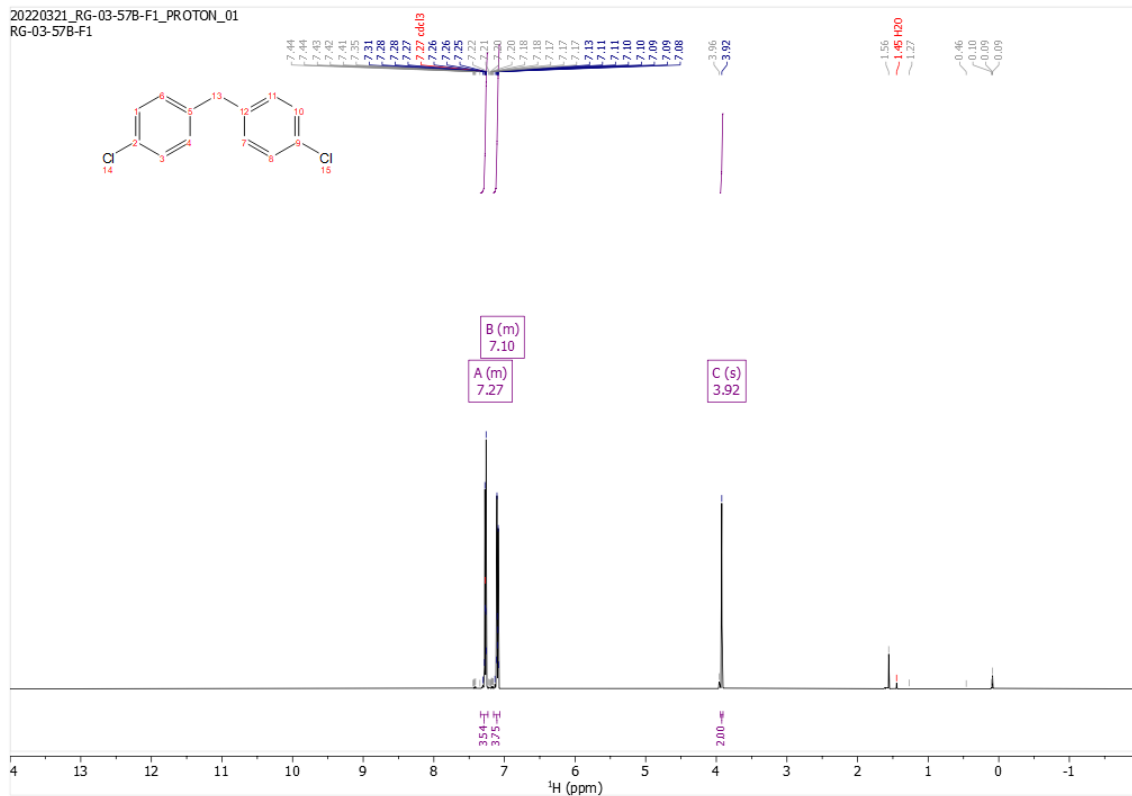

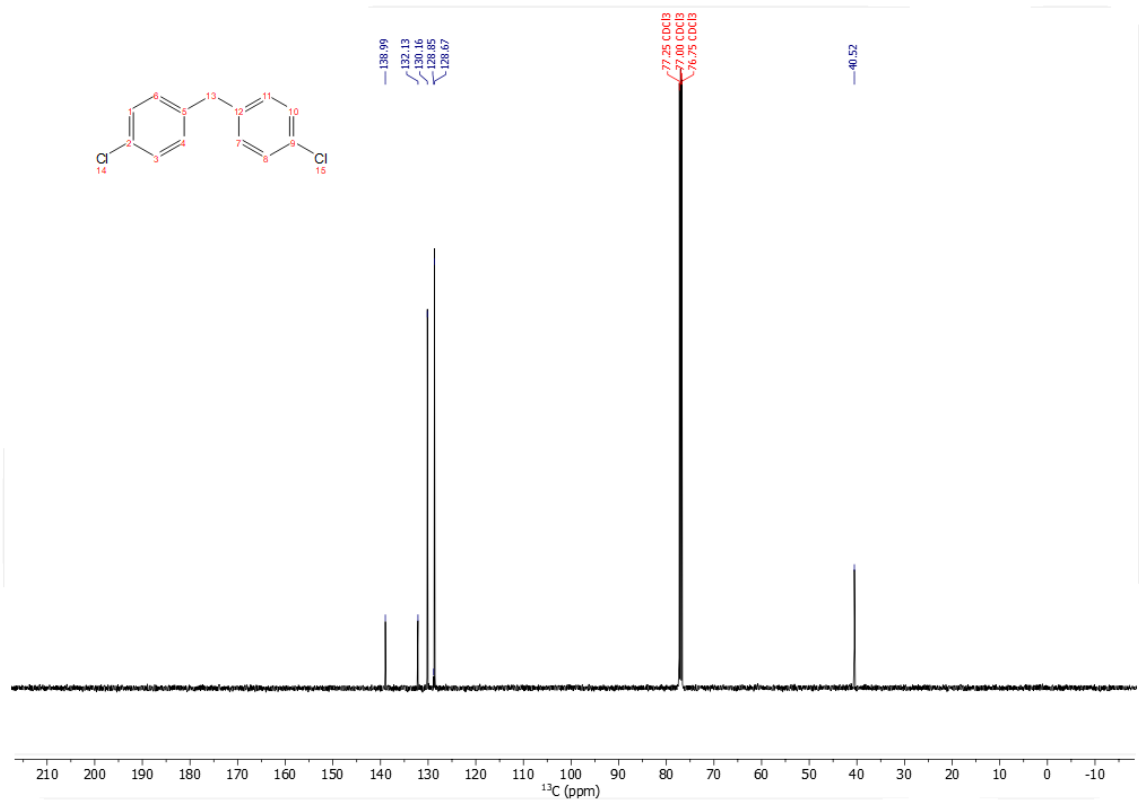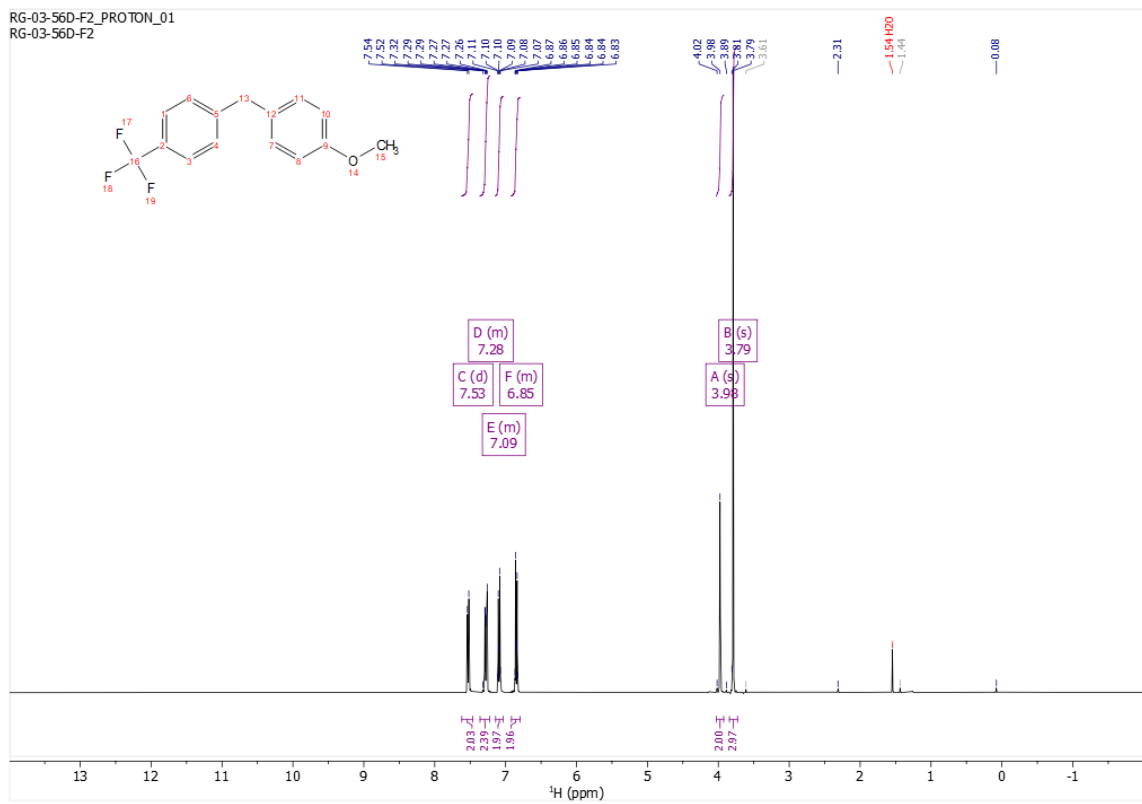

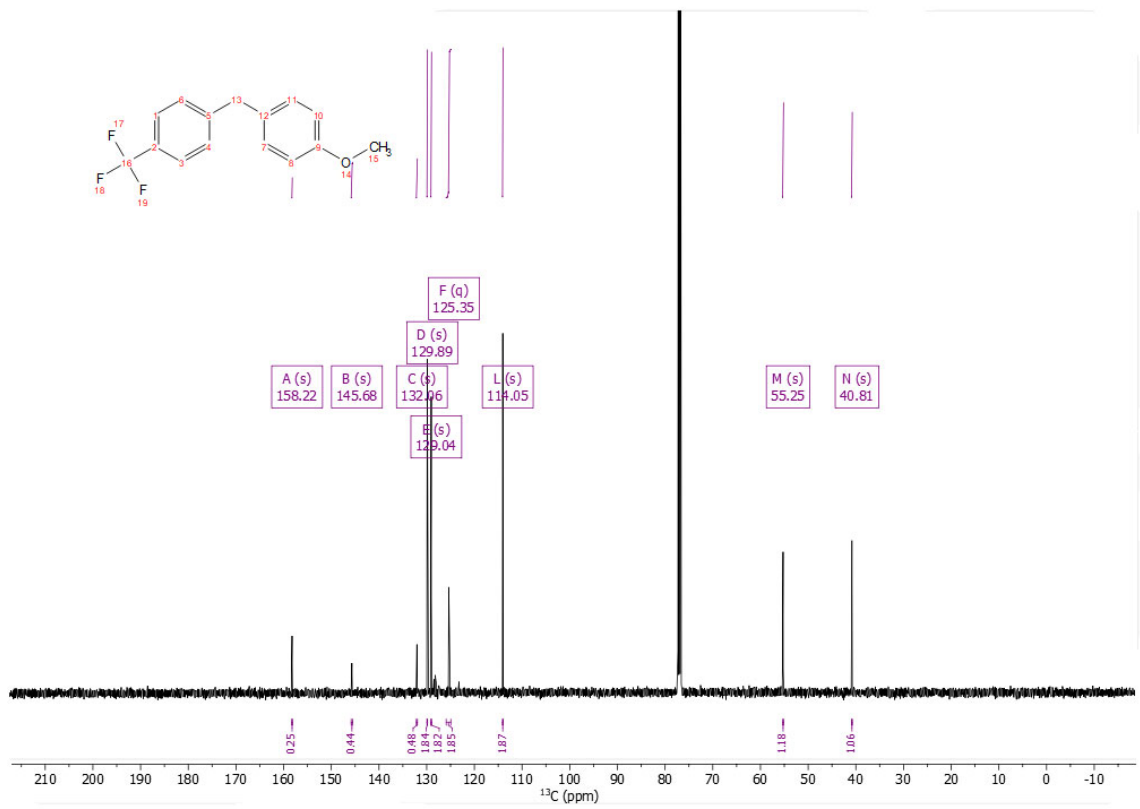

RG-03-123A-F5\_FLUORINE\_01  
RG-03-123A-F5

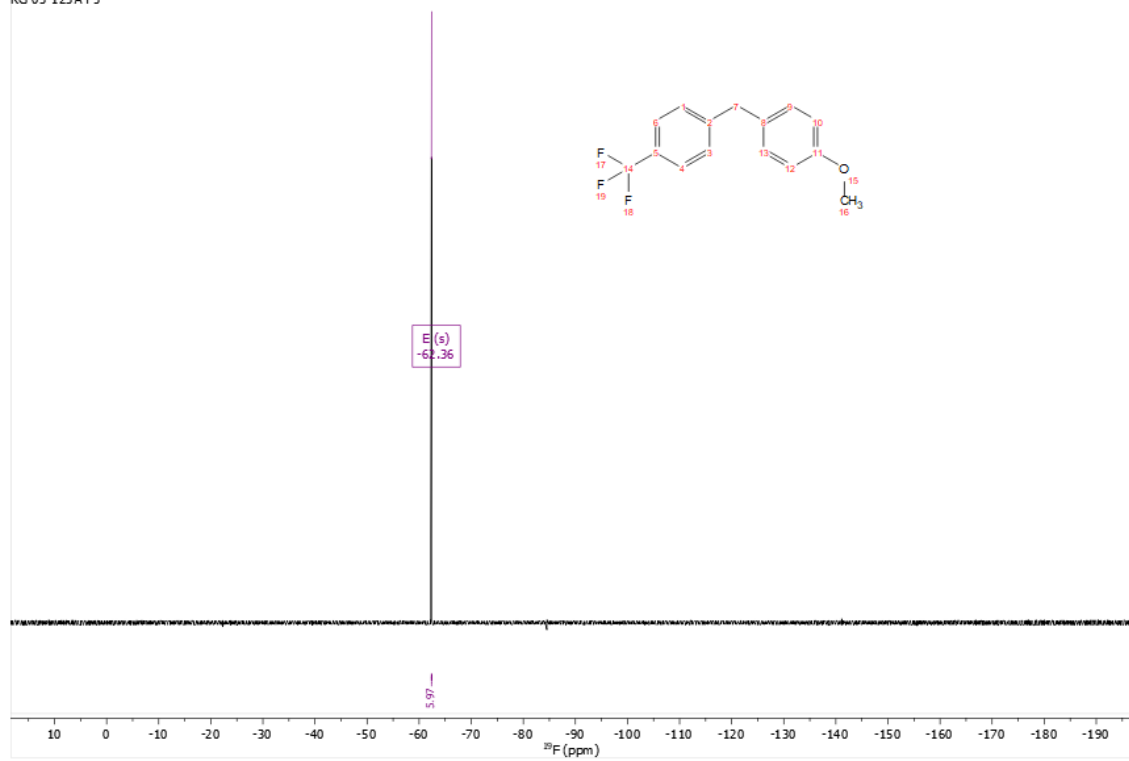



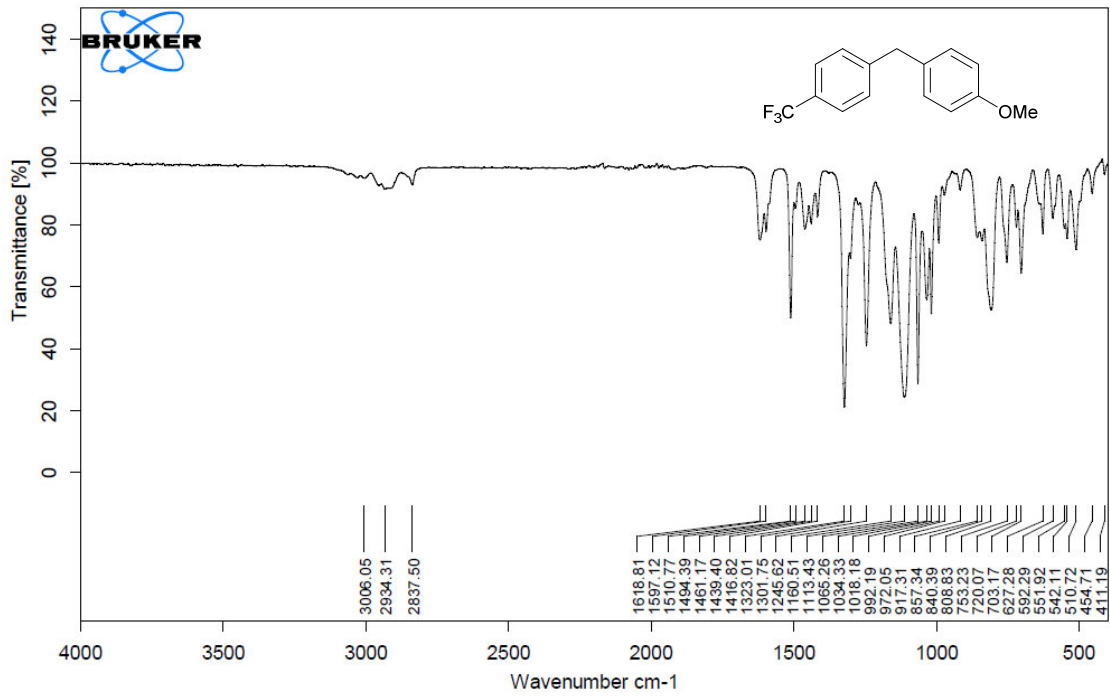

220426-01APCI HRMS-Li-Ruohua Gui-RG-0... 04/26/22 09:16:23

220426-01APCI HRMS-Li-Ruohua Gui-RG-03-56D #265-283 RT: 0.64-0.68 AV: 19 NL: 1.17E7  
T: FTMS - p APCI corona Full ms [200.0000-500.0000]

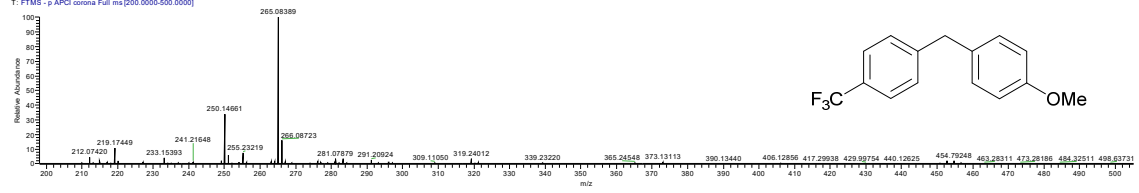

220426-01APCI HRMS-Li-Ruohua Gui-RG-03-56D #265-283 RT: 0.64-0.68 AV: 19 NL: 1.17E7  
T: FTMS - p APCI corona Full ms [200.0000-500.0000]

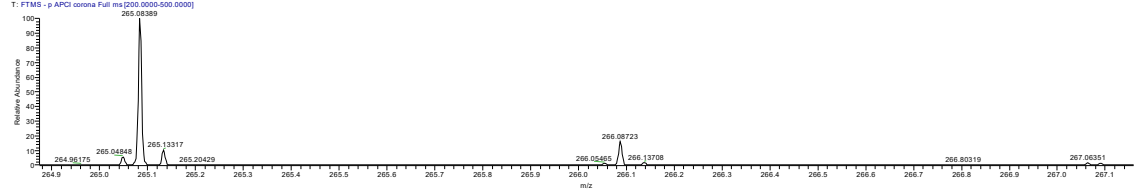

220426-01APCI HRMS-Li-Ruohua Gui-RG-03-56D #265-283 RT: 0.64-0.68 AV: 19  
T: FTMS - p APCI corona Full ms [200.0000-500.0000]

| m/z       | Intensity  | Relative | Resolution | Charge | Theo. Mass | Delta (ppm) | RDB equiv. | Composition                                      |
|-----------|------------|----------|------------|--------|------------|-------------|------------|--------------------------------------------------|
| 265.08389 | 11671075.0 | 100.00   | 33269.82   | 1.00   | 265.08457  | -2.56       | 8.5        | C <sub>15</sub> H <sub>12</sub> O F <sub>3</sub> |

20220404\_RG-03-66G-F1\_PROTON\_01  
RG-03-66G-F1

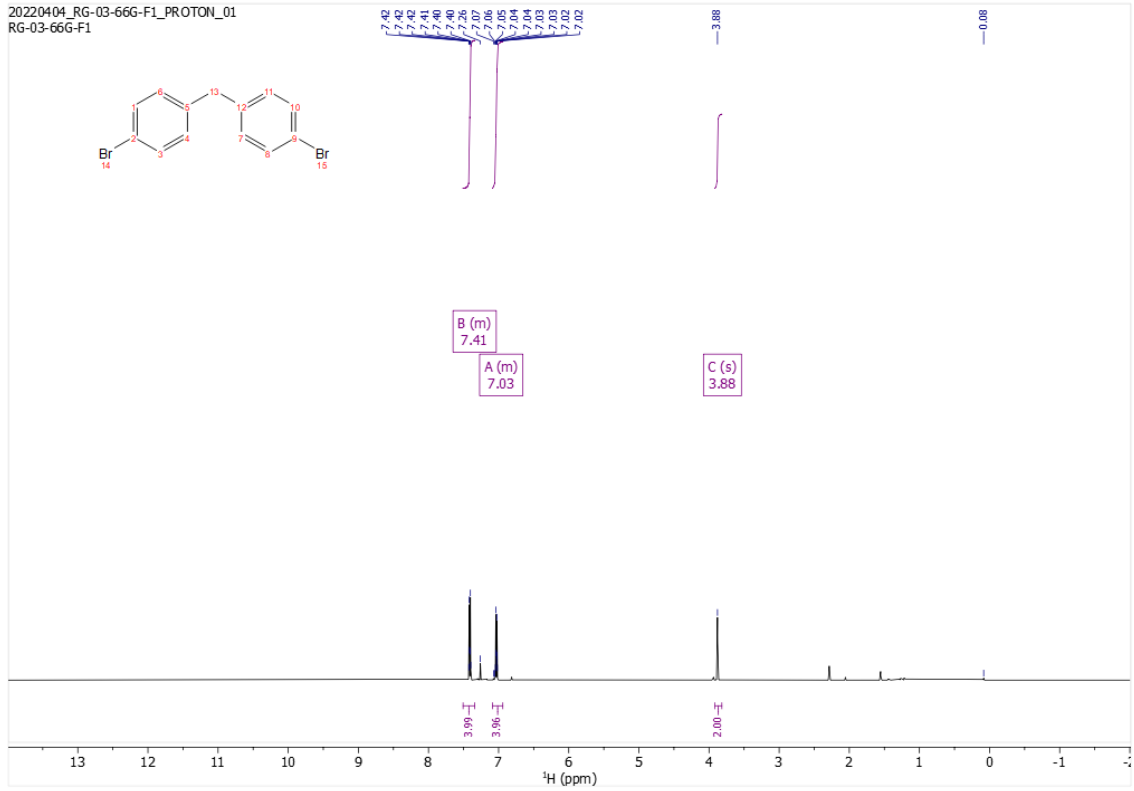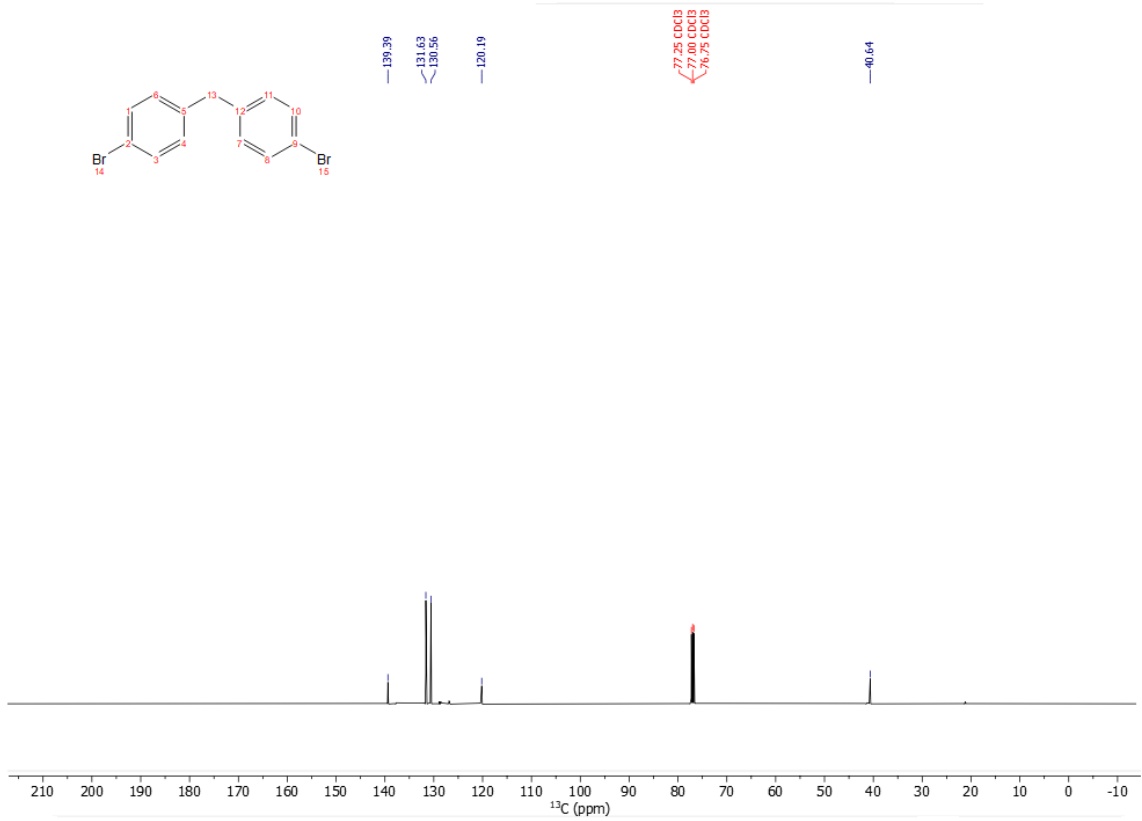

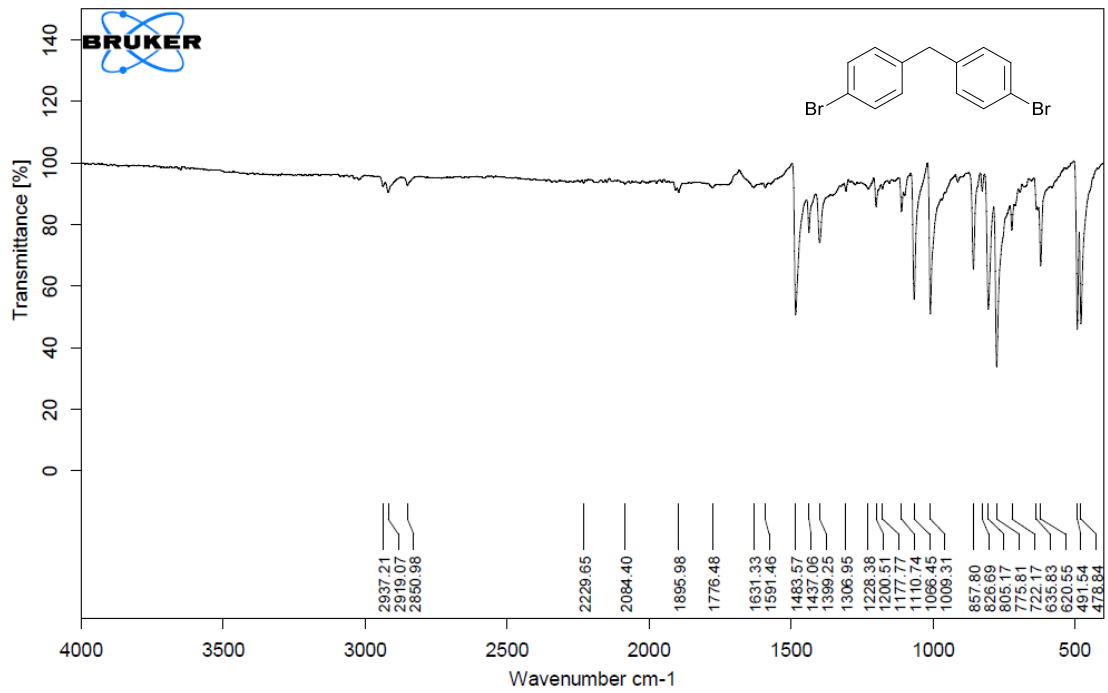

220427-06APCI HRMS-Li-Ruohua Gui-RG-0... 04/27/22 13:33:03

220427-06APCI HRMS-Li-Ruohua Gui-RG-03-73C#738-768 RT: 3.83-3.87 AV: 20 NL: 1.26E7  
T: FTMS - p APCI corona #d=30.00 Full ms [200.0000-500.0000]

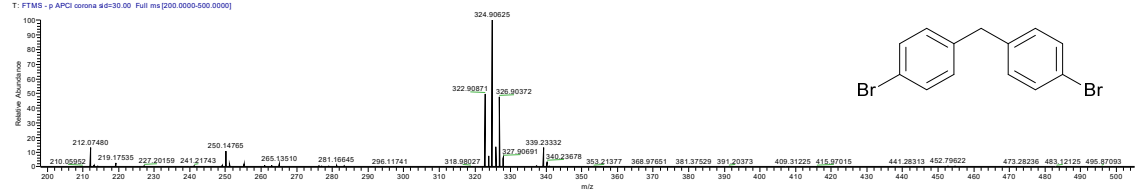

220427-06APCI HRMS-Li-Ruohua Gui-RG-03-73C#738-768 RT: 3.83-3.87 AV: 20 NL: 1.26E7  
T: FTMS - p APCI corona #d=30.00 Full ms [200.0000-500.0000]

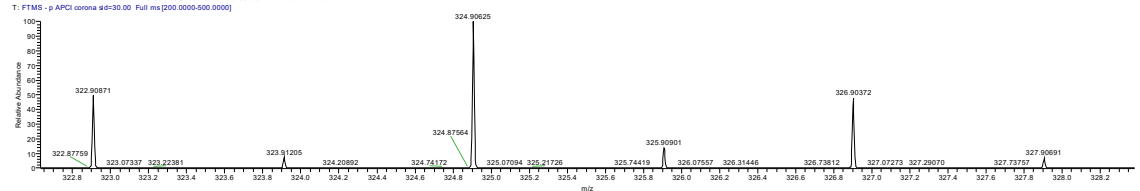

220427-06APCI HRMS-Li-Ruohua Gui-RG-03-73C#738-757 RT: 3.83-3.87 AV: 20

T: FTMS - p APCI corona sid=30.00 Full ms [200.0000-500.0000]

| m/z       | Intensity | Relative | Resolution | Charge | Theo. Mass | Delta (ppm) | RDB equiv. | Composition                                    |
|-----------|-----------|----------|------------|--------|------------|-------------|------------|------------------------------------------------|
| 322.90871 | 6347600.0 | 100.00   | 29559.04   | 1.00   | 322.90655  | 2.16        | 8.5        | C <sub>13</sub> H <sub>9</sub> Br <sub>2</sub> |

RG-03-65F-F2\_PROTON\_01  
RG-03-65F-F2

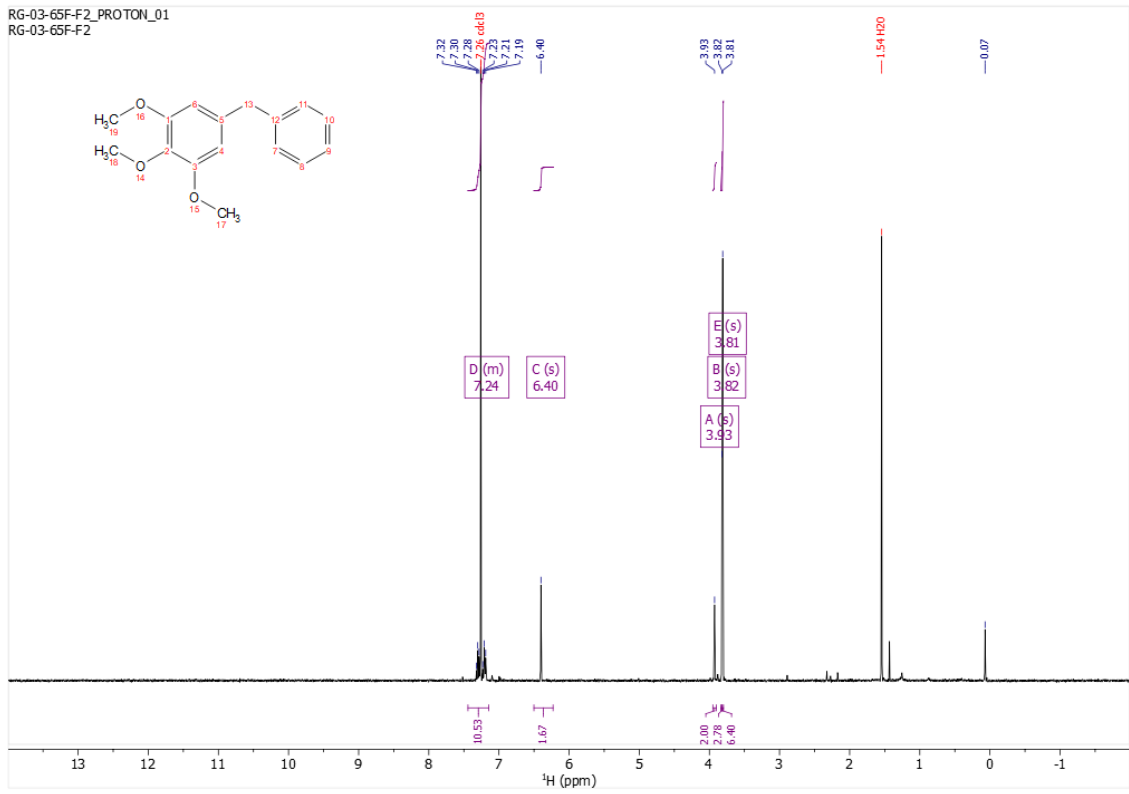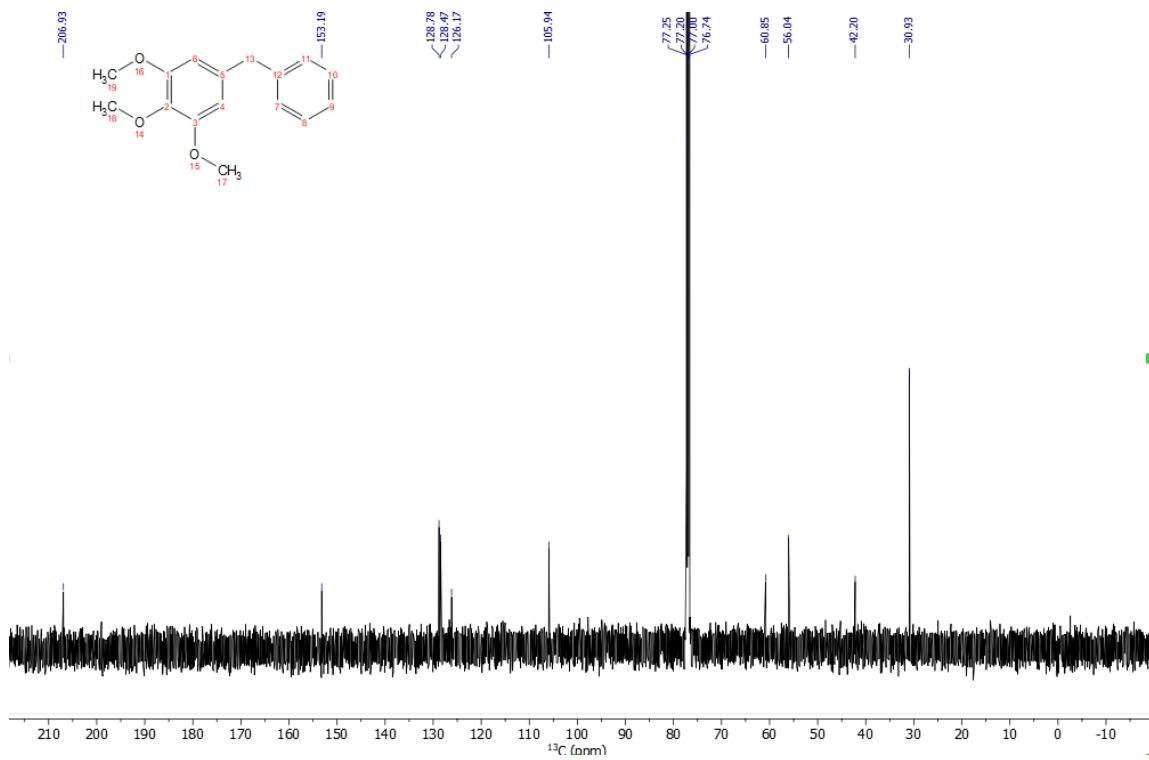

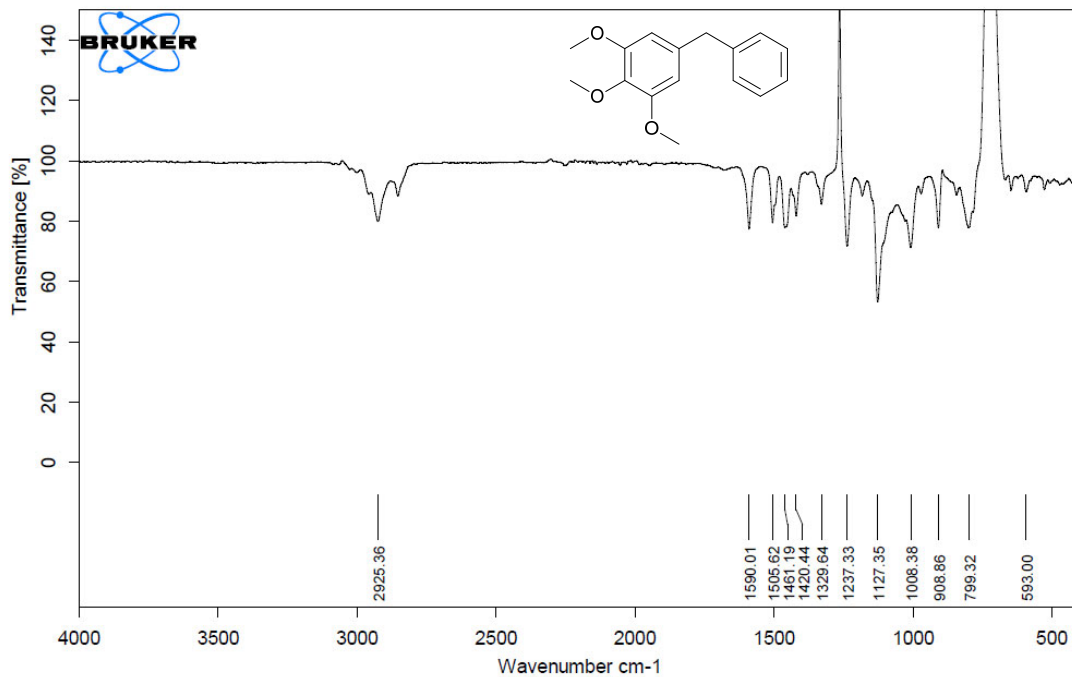

220427-05ESI HRMS-Li-Ruohua Gui-RG-03...

04/27/22 11:12:41

220427-05ESI HRMS-Li-Ruohua Gui-RG-03-73A #405-412 RT: 0.96-0.98 AV: 8 SB: 15 0.01-0.04 NL: 2.85E8  
T: FTMS + p ESI Full ms [150.0000-500.0000]

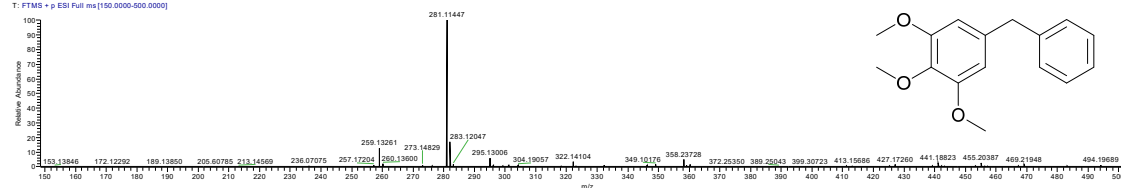

220427-05ESI HRMS-Li-Ruohua Gui-RG-03-73A#405-412 RT: 0.96-0.98 AV: 8  
SB: 15 0.01-0.04  
T: FTMS + p ESI Full ms [150.0000-500.0000]

| m/z       | Intensity  | Relative | Resolution | Charge | Theo. Mass | Delta (ppm) | RDB equiv. | Composition                                    |
|-----------|------------|----------|------------|--------|------------|-------------|------------|------------------------------------------------|
| 259.13261 | 37041412.0 | 100.00   | 34239.50   | 1.00   | 259.13287  | -1.00       | 7.5        | C <sub>16</sub> H <sub>19</sub> O <sub>3</sub> |

220427-05ESI HRMS-Li-Ruohua Gui-RG-03-73A#405-412 RT: 0.96-0.98 AV: 8  
SB: 15 0.01-0.04  
T: FTMS + p ESI Full ms [150.0000-500.0000]

| m/z       | Intensity   | Relative | Resolution | Charge | Theo. Mass | Delta (ppm) | RDB equiv. | Composition                                       |
|-----------|-------------|----------|------------|--------|------------|-------------|------------|---------------------------------------------------|
| 281.11447 | 285351200.0 | 100.00   | 32858.57   | 1.00   | 281.11482  | -1.22       | 7.5        | C <sub>16</sub> H <sub>18</sub> O <sub>3</sub> Na |

RG-03-83D-F6-recheck\_PROTON\_01  
RG-03-83D-F6-recheck

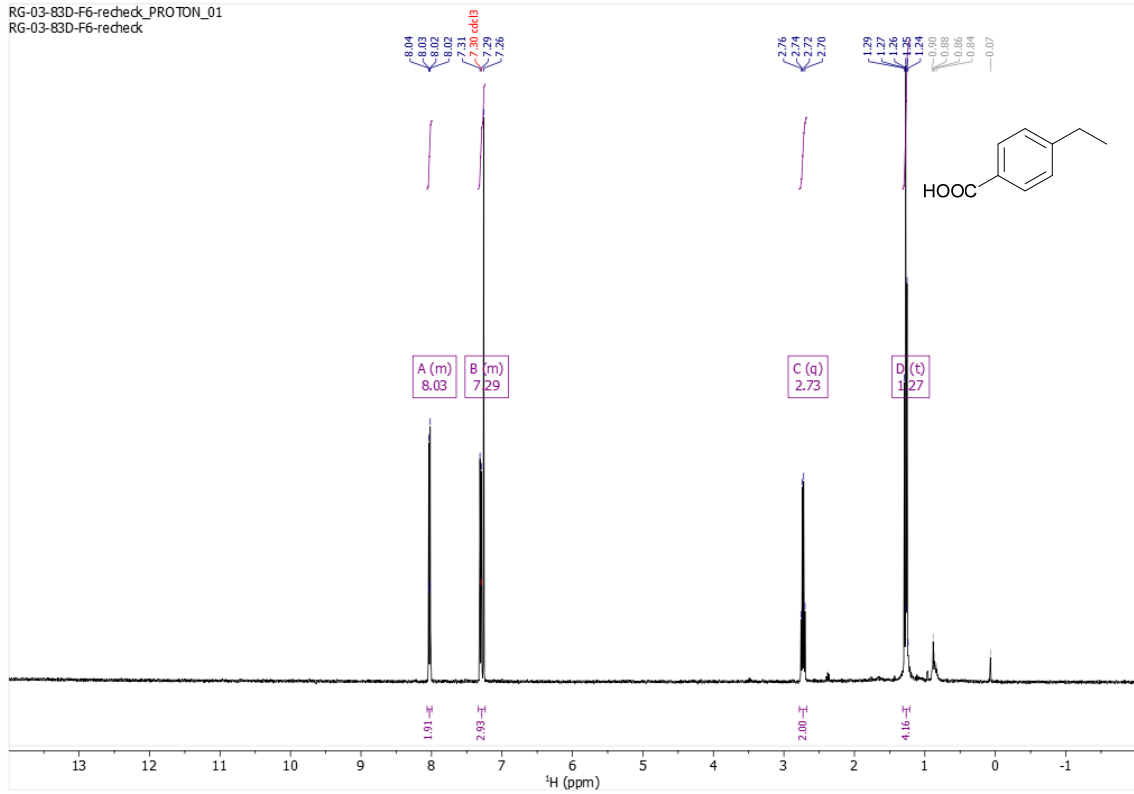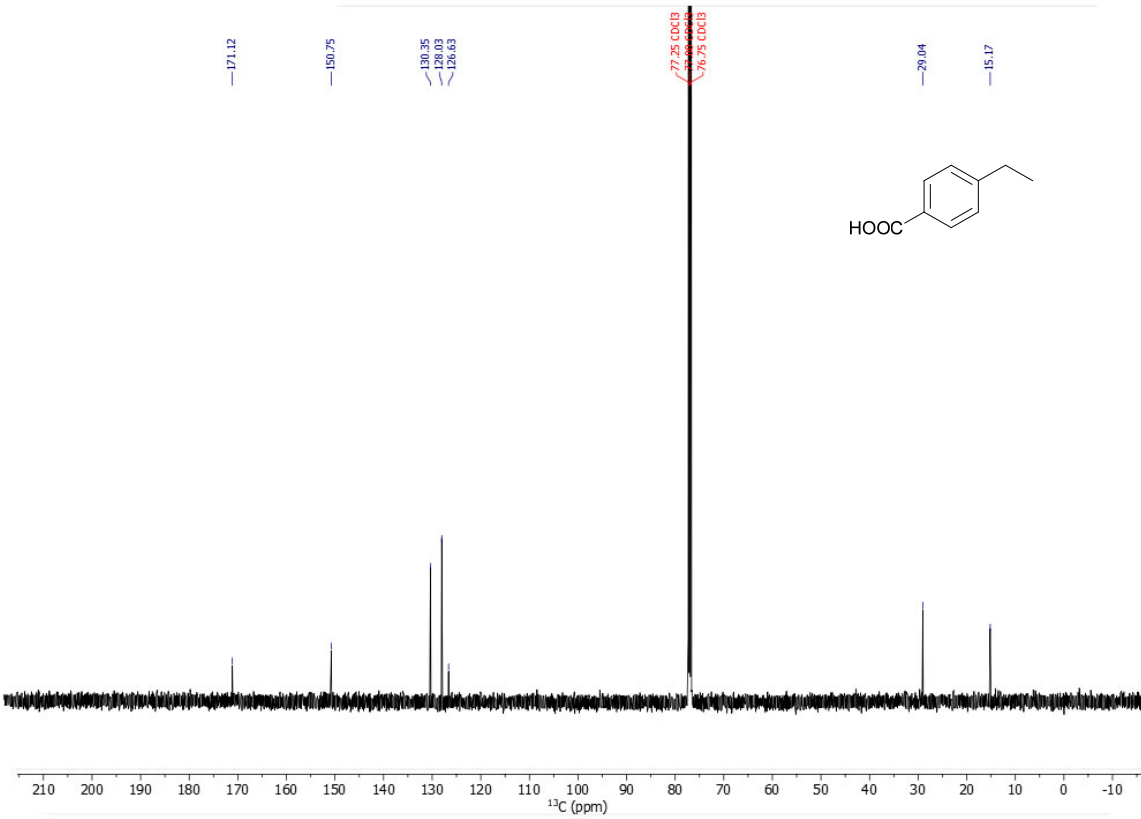

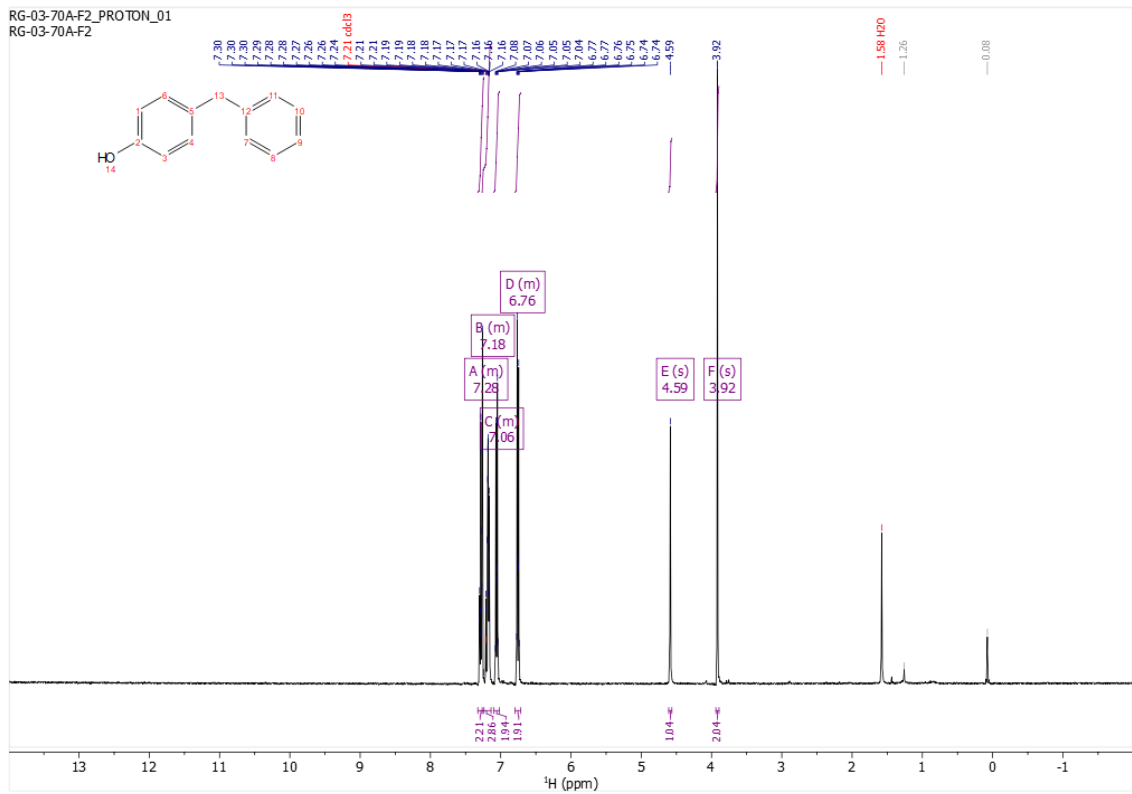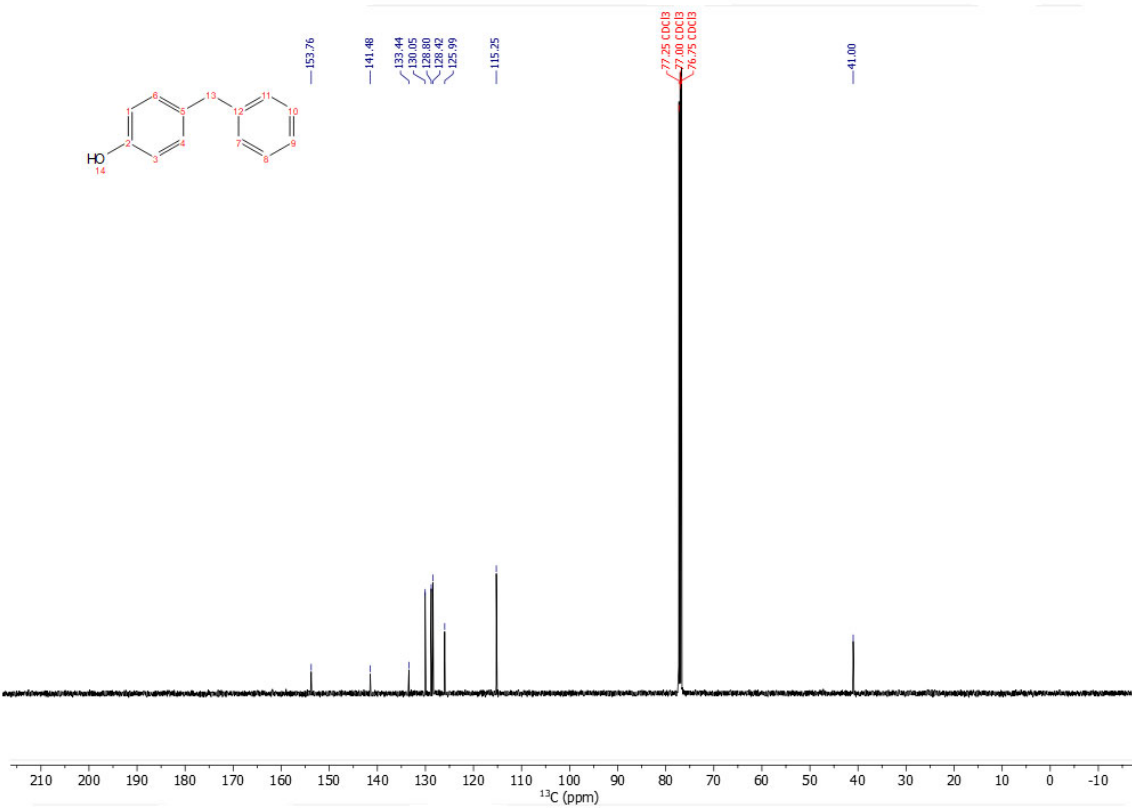

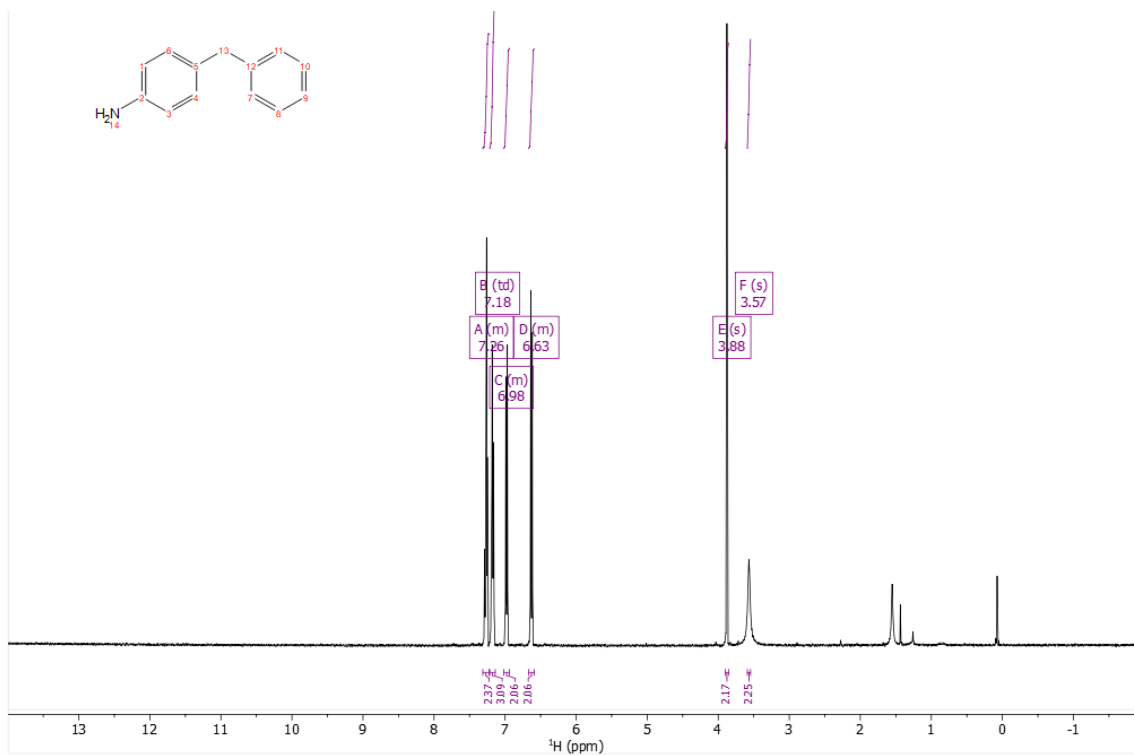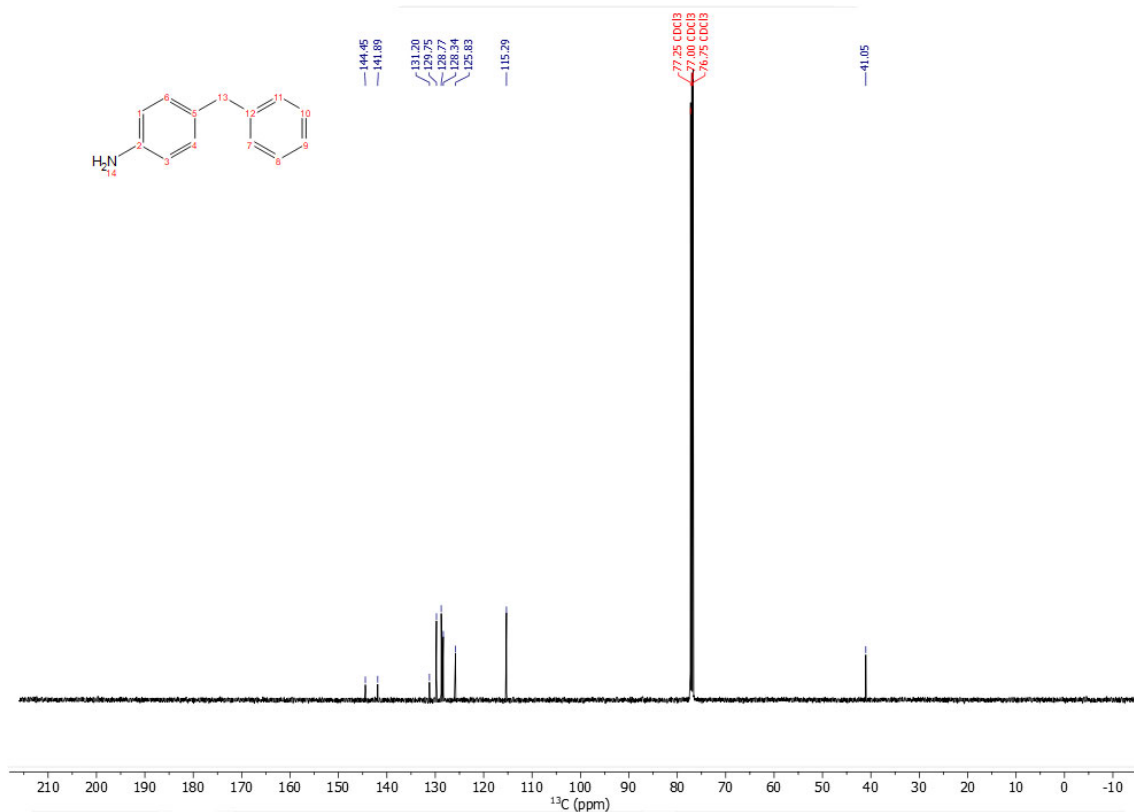



RG-03-65H-F1\_PROTON\_01  
RG-03-65H-F1

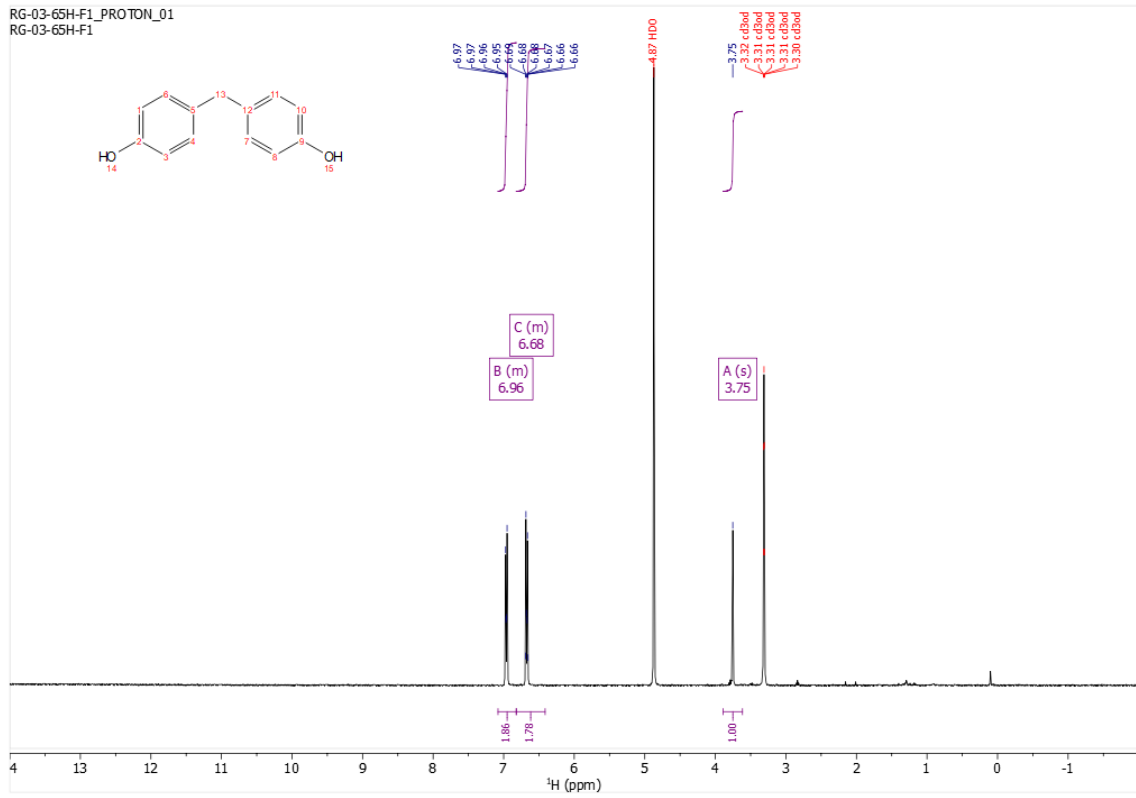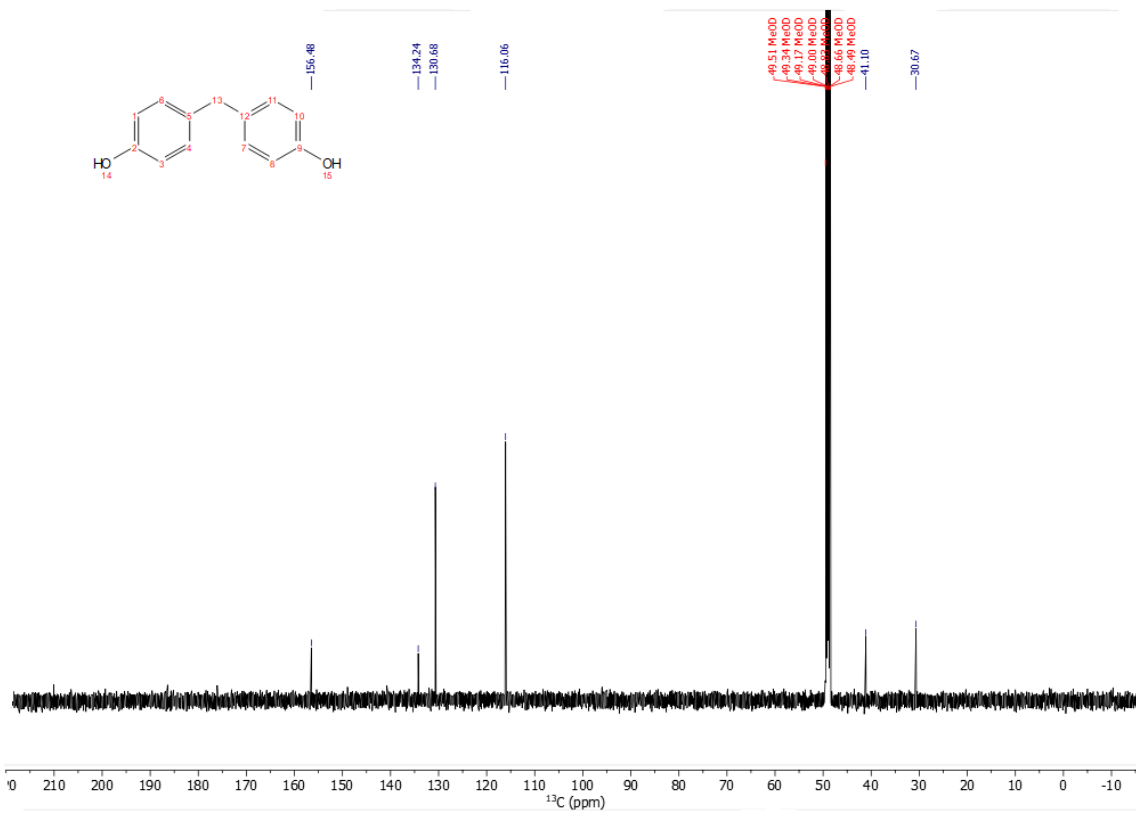



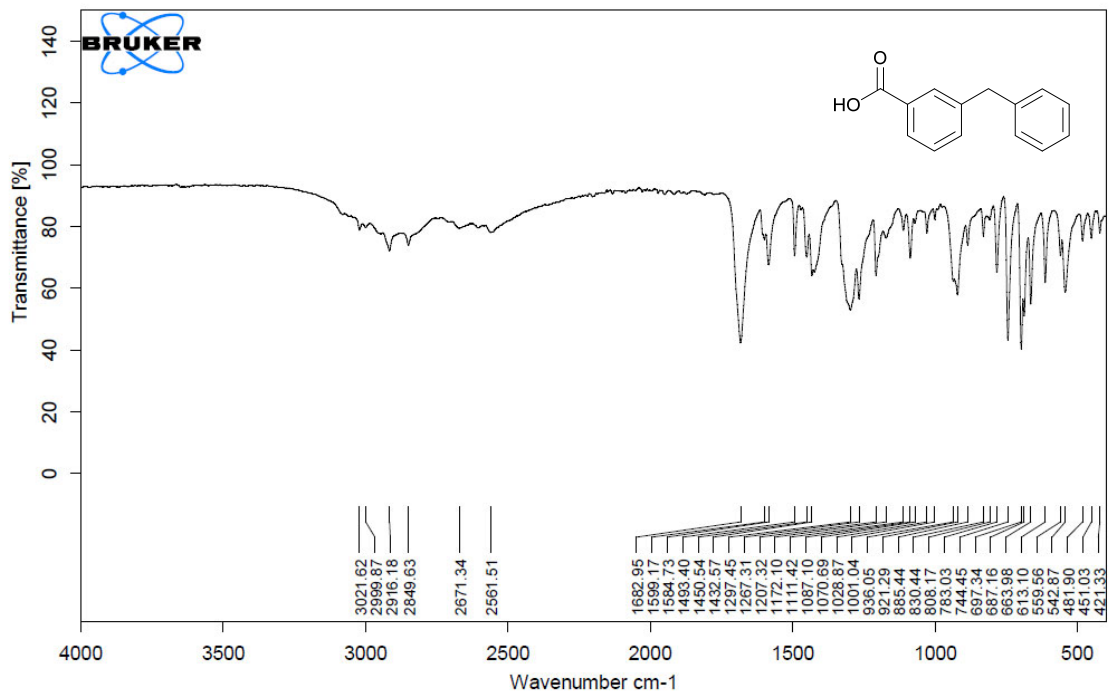

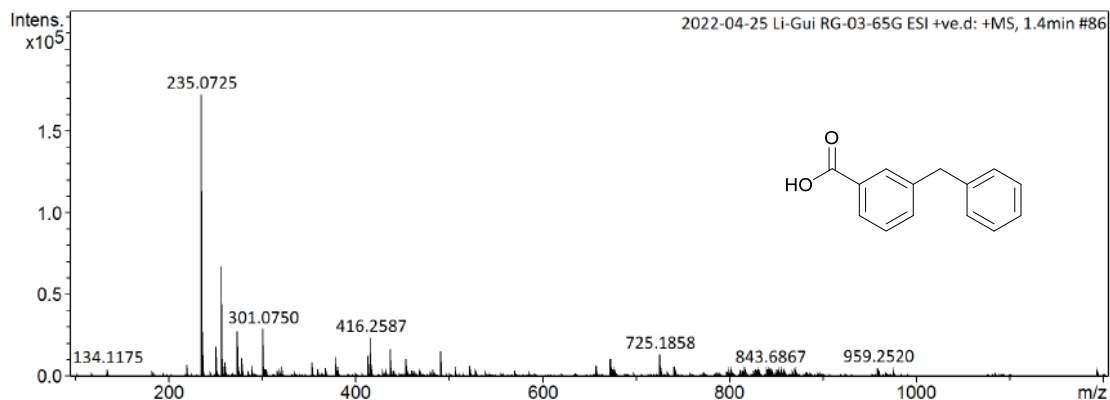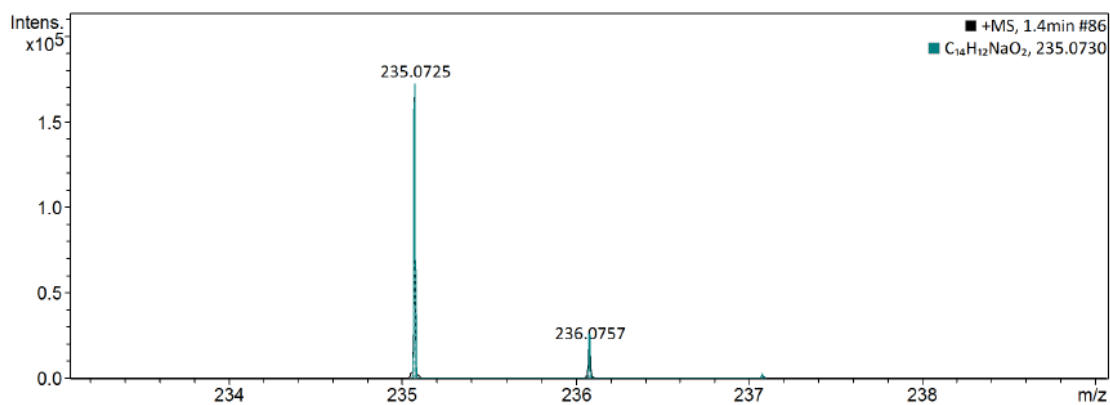

| Meas. m/z | # | Ion Formula                                                    | m/z      | err [ppm] | mSigma | # mSigma | Score  | rdb  | e <sup>-</sup> Conf | N-Rule |
|-----------|---|----------------------------------------------------------------|----------|-----------|--------|----------|--------|------|---------------------|--------|
| 235.0725  | 1 | C <sub>12</sub> H <sub>7</sub> N <sub>6</sub>                  | 235.0727 | 0.6       | 22.4   | 1        | 100.00 | 12.5 | even                | ok     |
|           | 1 | C <sub>14</sub> H <sub>12</sub> NaO <sub>2</sub>               | 235.0730 | 1.8       | 23.1   | 1        | 100.00 | 8.5  | even                | ok     |
| 257.0545  | 1 | C <sub>12</sub> H <sub>6</sub> N <sub>6</sub> Na               | 257.0546 | 0.4       | 14.6   | 1        | 100.00 | 12.5 | even                | ok     |
|           | 1 | C <sub>12</sub> H <sub>6</sub> N <sub>6</sub> Na               | 257.0546 | 0.4       | 14.6   | 1        | 100.00 | 12.5 | even                | ok     |
|           | 2 | C <sub>14</sub> H <sub>11</sub> Na <sub>2</sub> O <sub>2</sub> | 257.0549 | 1.5       | 15.1   | 2        | 87.61  | 8.5  | even                | ok     |

## IX. Mechanism study

### Scheme 5. Reaction in d-methanol

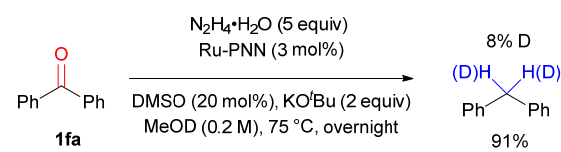

### <sup>1</sup>H NMR data

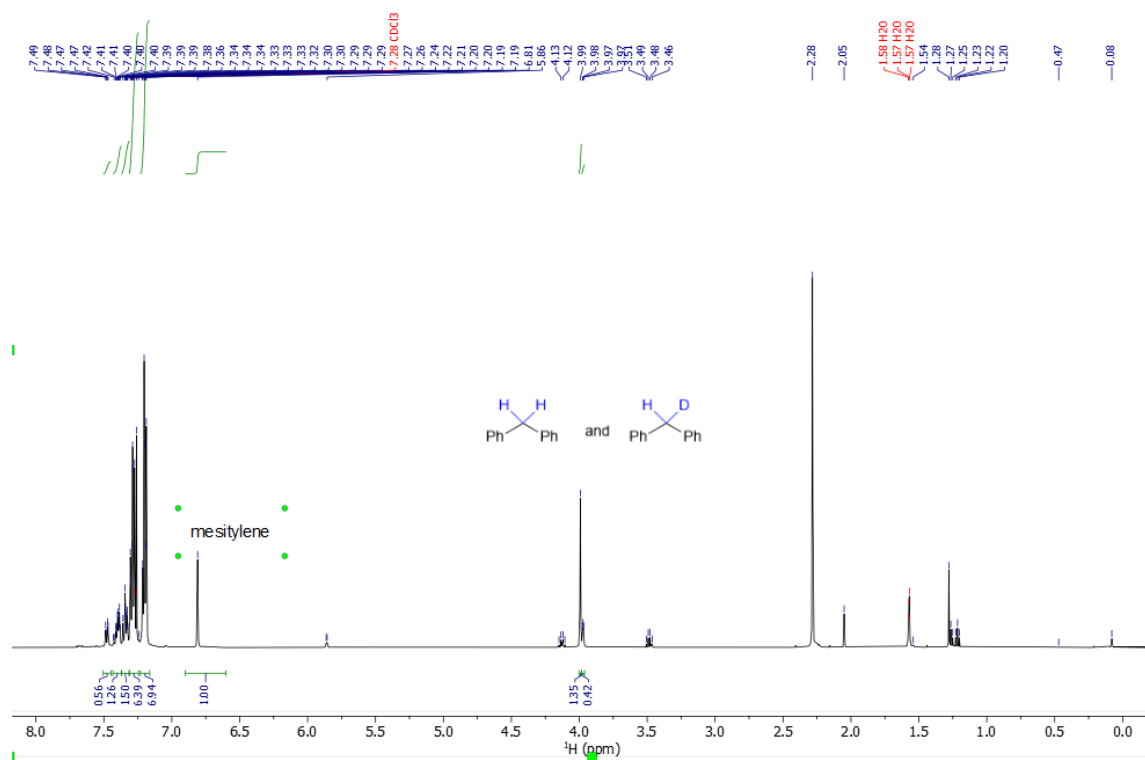

**<sup>2</sup>D NMR data**

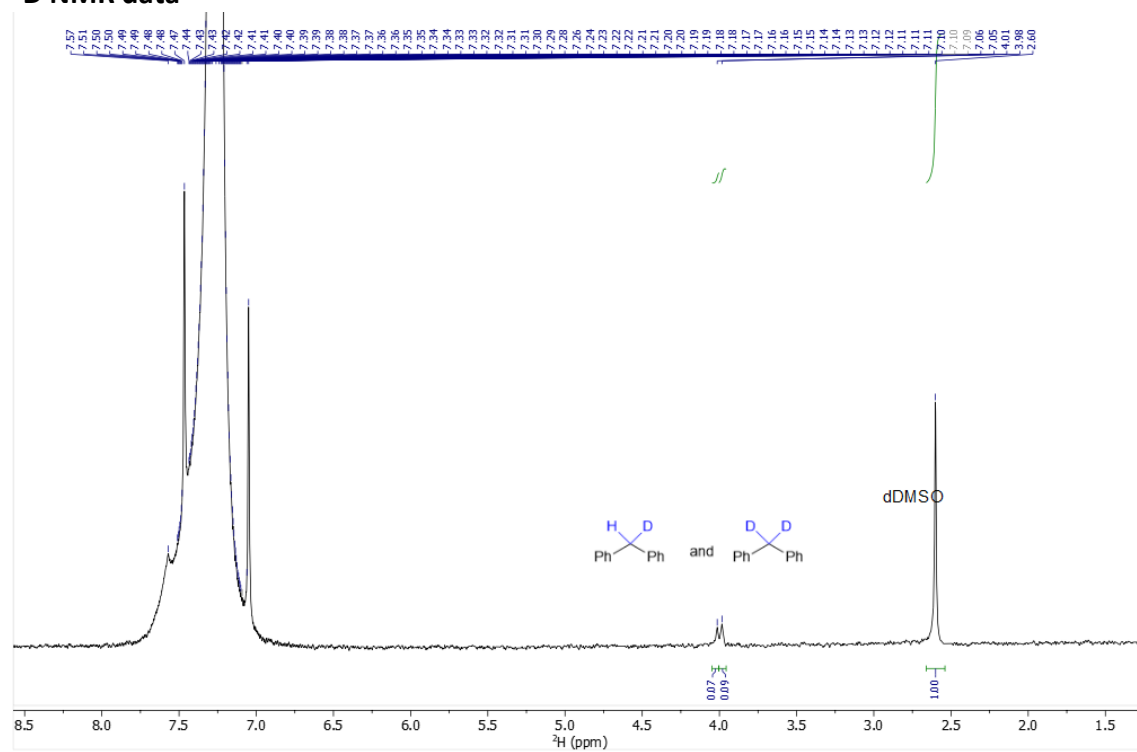

Scheme 6. Reaction in d-methanol

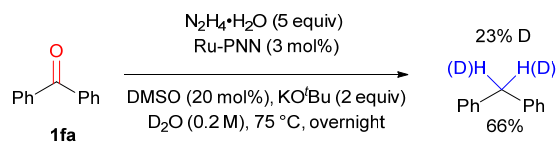

<sup>1</sup>H NMR data

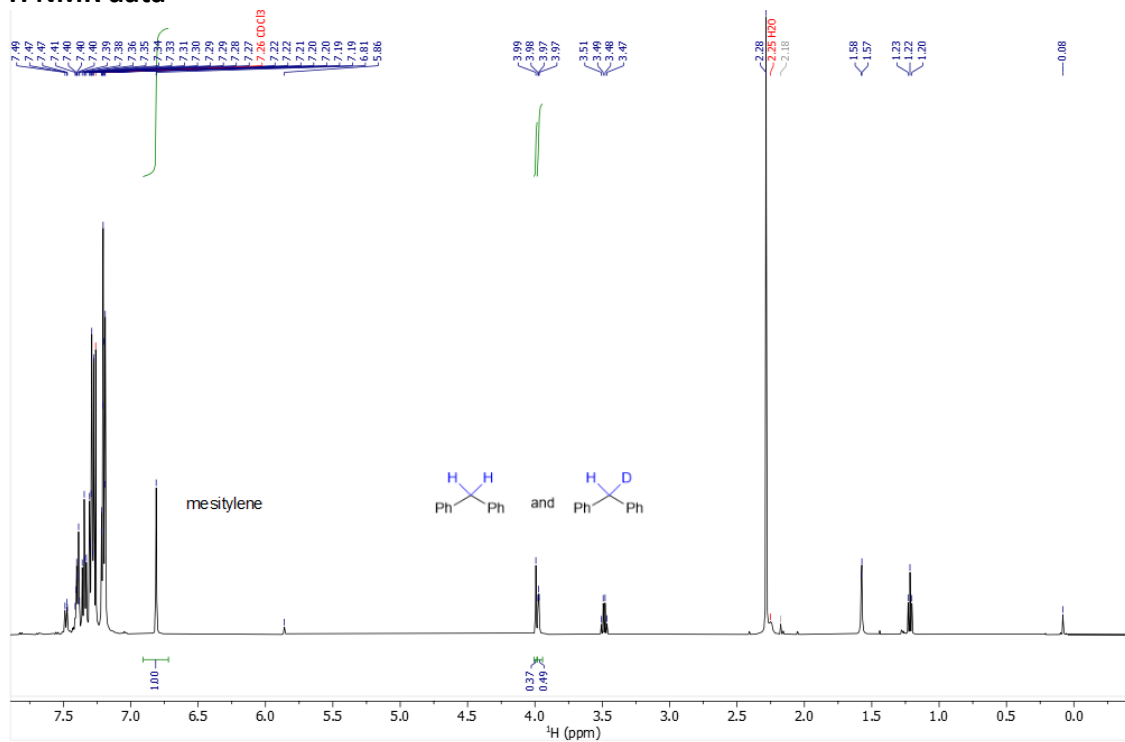

## <sup>2</sup>D NMR data

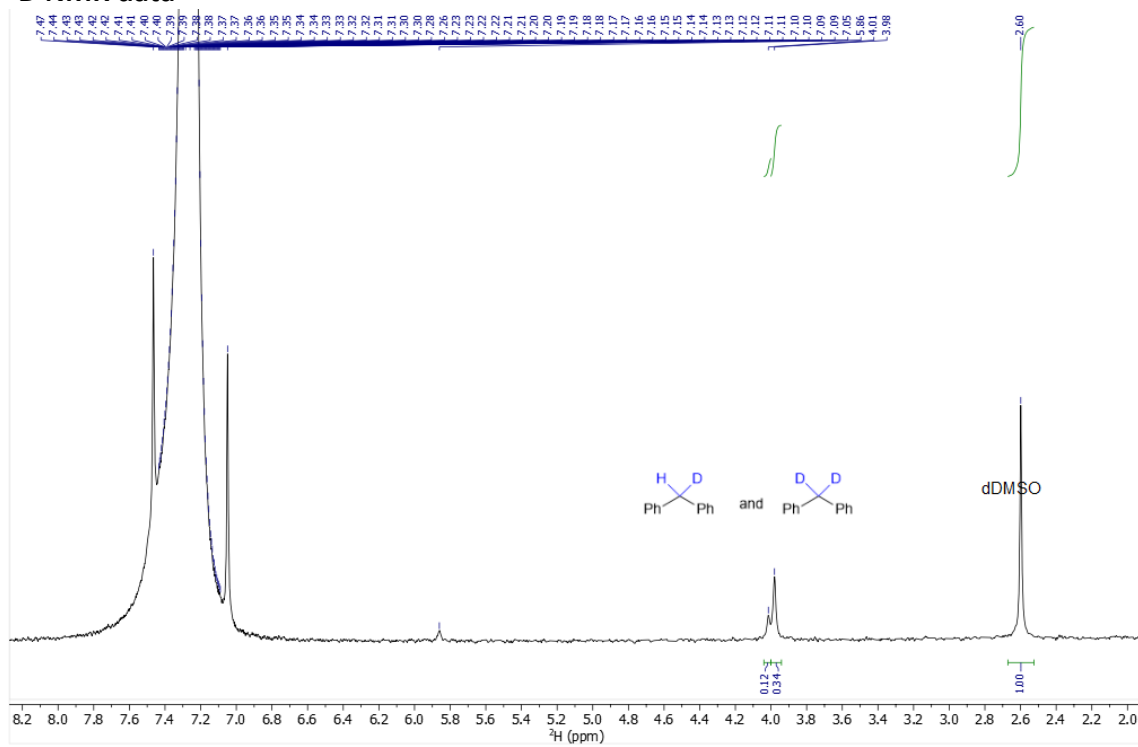

## Scheme 7. In situ <sup>1</sup>H NMR of Ru-H species

20220511\_RG-03-79A-rerun\_PROTON\_01  
RG-03-79A-rerun

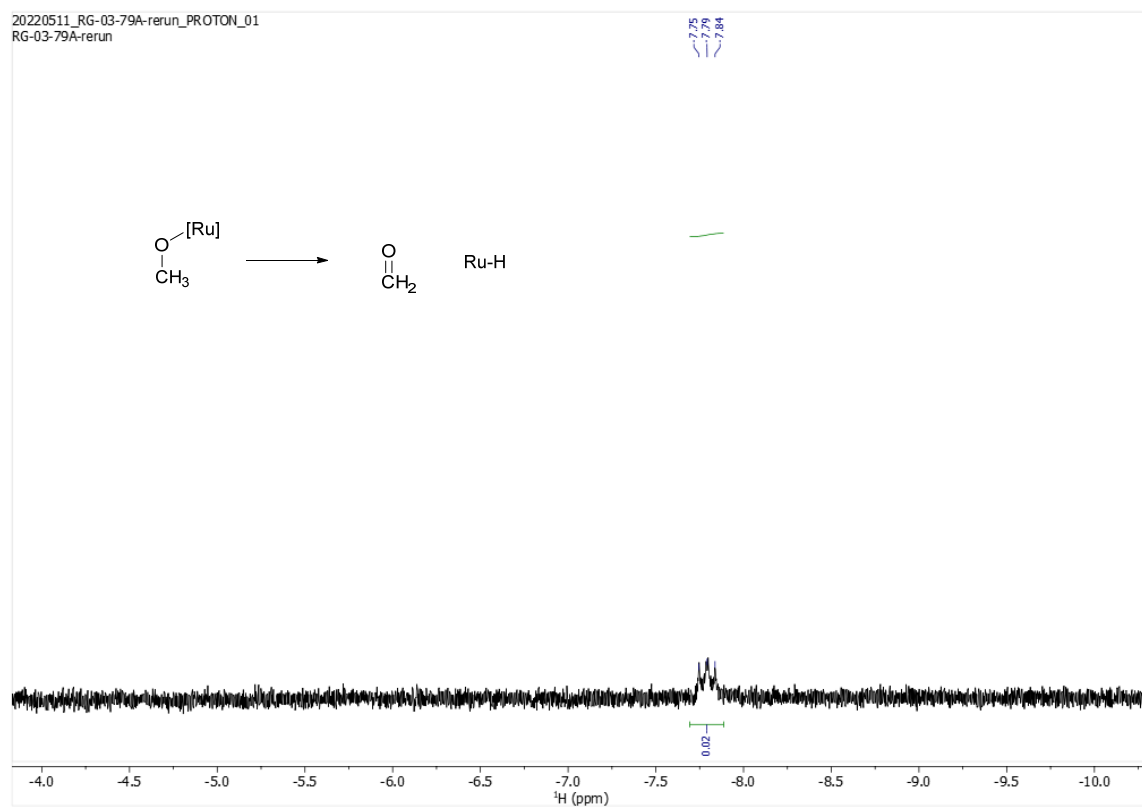



### Scheme 8. Control Experiments

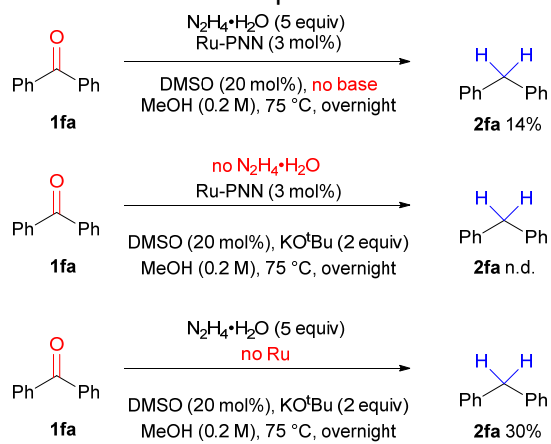

Supplement: d2cc03326g1.pdf [file d2cc03326g1.pdf]
